# Supplementary material for: Chloroaluminate Ionic Liquid Immobilized on Magnetic Nanoparticles as a Heterogeneous Lewis Acidic Catalyst for the Friedel–Crafts Sulfonylation of Aromatic Compounds
Source: MDPI journal article supplement (doi:10.3390/molecules27051644), 2022-03-02
Supplement: s1 [file s1]

*Supplementary*

## **Chloroaluminate ionic liquid immobilized on magnetic nanoparticle as a heterogeneous Lewis acidic catalyst for the Friedel–Crafts sulfonylation of aromatic compounds**

Ngoc-Lan Thi Nguyen<sup>1</sup>, Quoc-Anh Nguyen<sup>1</sup>, Tien Khoa Le<sup>1</sup>, Thi Xuan Thi Luu<sup>\*1,2</sup>, Kim-Ngan Thi Tran<sup>1</sup> and Phuoc-Bao Pham<sup>1</sup>

---

<sup>1</sup> Ngoc-Lan Thi Nguyen, Quoc- Anh Nguyen, Tien Khoa Le, Thi Xuan Thi Luu, Kim-Ngan Thi Tran and Phuoc-Bao Pham

Faculty of Chemistry, University of Science

227 Nguyen Van Cu St, Dist. 5, Ho Chi Minh City, Vietnam

<sup>2</sup> Vietnam National University of Hochiminh City, Vietnam

\* Correspondence: ltxthi@hcmus.edu.vn

| Contents                                                                                                 | Pages |
|----------------------------------------------------------------------------------------------------------|-------|
| Surface area of Fe <sub>3</sub> O <sub>4</sub> @O <sub>2</sub> Si[PrMIM]Cl·AlCl <sub>3</sub> (Figure S1) | 2     |
| NMR spectra and HRMS of unknown-products                                                                 | 3-72  |
| 1-((4-chlorophenyl)sulfonyl)-2-methylbenzene ( <b>3c'</b> ) (Figure S2-S4)                               | 3-5   |
| 1-methyl-2-((4-nitrophenyl)sulfonyl)benzene ( <b>3d'</b> ) (Figure S5-S7)                                | 6-8   |
| 1-((4-chlorophenyl)sulfonyl)-2-methoxybenzene ( <b>3h'</b> ) (Figure S8-S10)                             | 9-11  |
| 1-methoxy-2-((4-nitrophenyl)sulfonyl)benzene ( <b>3i'</b> ) (Figure S11-S13)                             | 12-14 |
| 1-(ethylsulfonyl)-4-methoxybenzene ( <b>3j</b> ) (Figure S14-S16)                                        | 15-17 |
| 1-(Ethylsulfonyl)-2-methoxybenzene ( <b>3j'</b> ) (Figure S17-S19)                                       | 18-20 |
| 1-(Isobutylsulfonyl)-4-methoxybenzene ( <b>3k</b> ) (Figure S20-S22)                                     | 21-23 |
| 1-(Isobutylsulfonyl)-2-methoxybenzene ( <b>3k'</b> ) (Figure S23-S25)                                    | 24-26 |
| 1-Methoxy-4-(octylsulfonyl)benzene ( <b>3l</b> ) (Figure S26-S28)                                        | 27-29 |
| 1-Methoxy-2-(octylsulfonyl)benzene ( <b>3l'</b> ) (Figure S29-S31)                                       | 30-32 |
| 2,3-dimethyl-1-tosylbenzene ( <b>3o'</b> ) (Figure S32-S34)                                              | 33-35 |
| 2,4-dimethoxy-1-tosylbenzene ( <b>3p</b> ) (Figure S35-S37)                                              | 36-38 |
| 1,3-dimethoxy-2-tosylbenzene ( <b>3p'</b> ) (Figure S38-S40)                                             | 39-41 |
| 1,4-dimethoxy-2-tosylbenzene ( <b>3q</b> ) (Figure S41-S43)                                              | 42-44 |
| 4-((4-chlorophenyl)sulfonyl)phenol ( <b>3r</b> ) (Figure S44-S46)                                        | 45-47 |
| 2-((4-chlorophenyl)sulfonyl)phenol ( <b>3r'</b> ) (Figure S47-S49)                                       | 48-50 |
| 2-(phenylsulfonyl)naphthalene ( <b>3s'</b> ) (Figure S50-S52)                                            | 51-53 |
| 4-(phenylsulfonyl)dibenzo[b,d]thiophene ( <b>3t'</b> ) (Figure S53-S55)                                  | 54-56 |
| 4-methoxy-2-methyl-1-tosylbenzene ( <b>3v</b> ) (Figure S56-S58)                                         | 57-59 |
| 2-methoxy-4-methyl-1-tosylbenzene ( <b>3v'</b> ) (Figure S59-S61)                                        | 60-62 |
| 1-methoxy-3-methyl-1-tosylbenzene ( <b>3v''</b> ) (Figure S62-S64)                                       | 63-65 |
| 1,2-dimethoxy-4-tosylbenzene ( <b>3w</b> ) (Figure S65-S67)                                              | 66-68 |
| 1,2-dimethoxy-3-tosylbenzene ( <b>3w'</b> ) (Figure S68-S70)                                             | 69-71 |

Surface area of  $\text{Fe}_3\text{O}_4@\text{O}_2\text{Si}[\text{PrMIM}]\text{Cl}\cdot\text{AlCl}_3$

### Multi-Point BET Plot

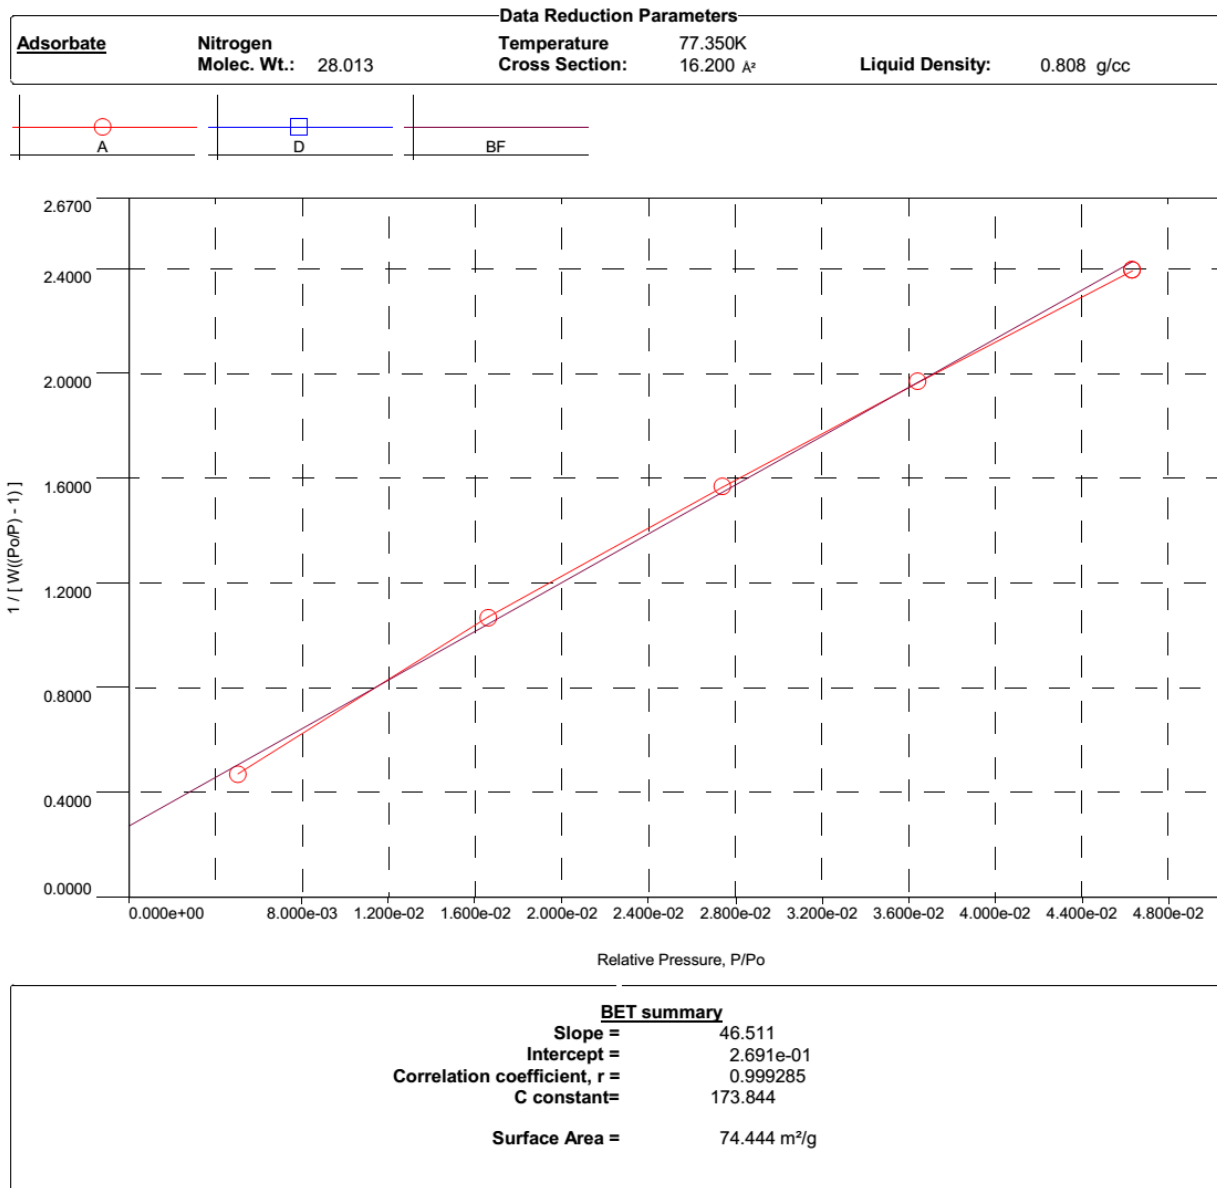

**Figure S1.** BET surface area of  $\text{Fe}_3\text{O}_4@\text{O}_2\text{Si}[\text{PrMIM}]\text{Cl}\cdot\text{AlCl}_3$

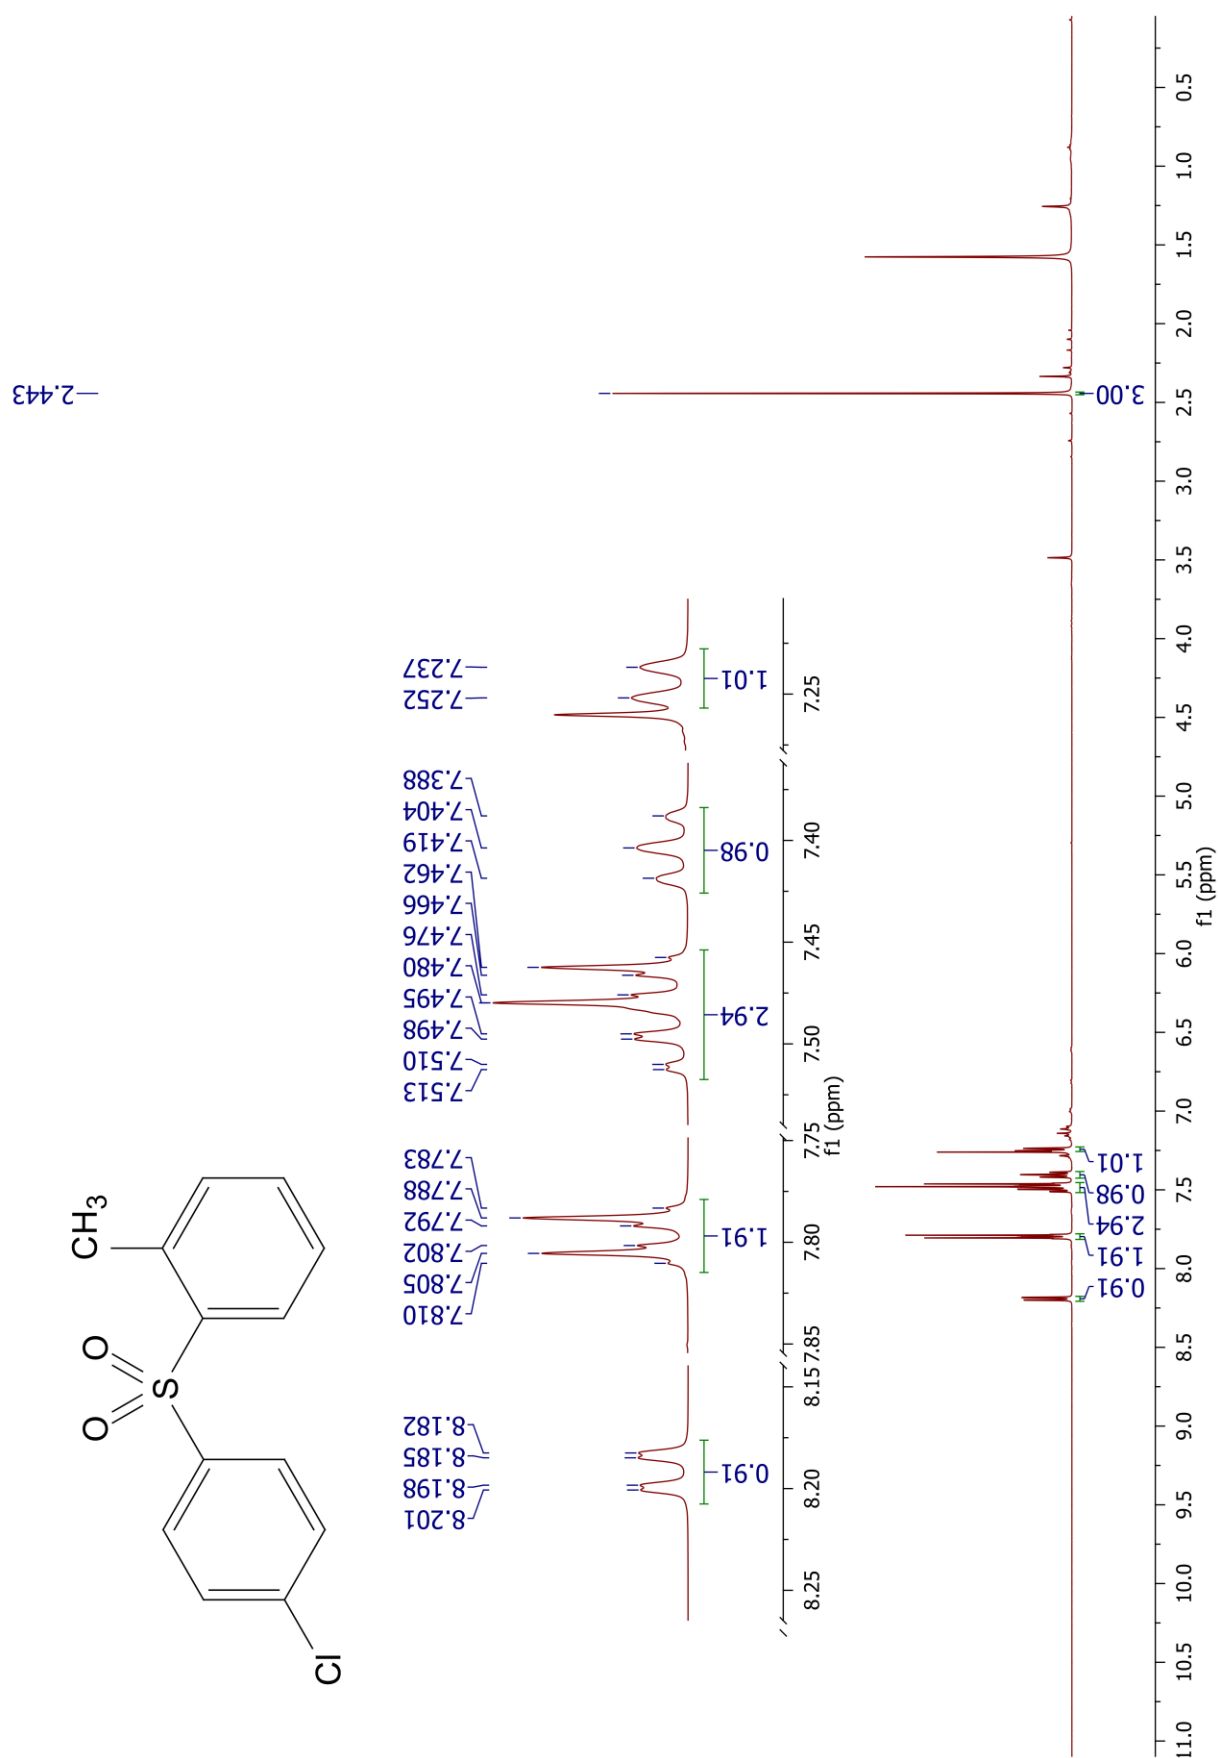

**Figure S2.** <sup>1</sup>H-NMR of 1-((4-chlorophenyl)sulfonyl)-2-methylbenzene (**3c'**)



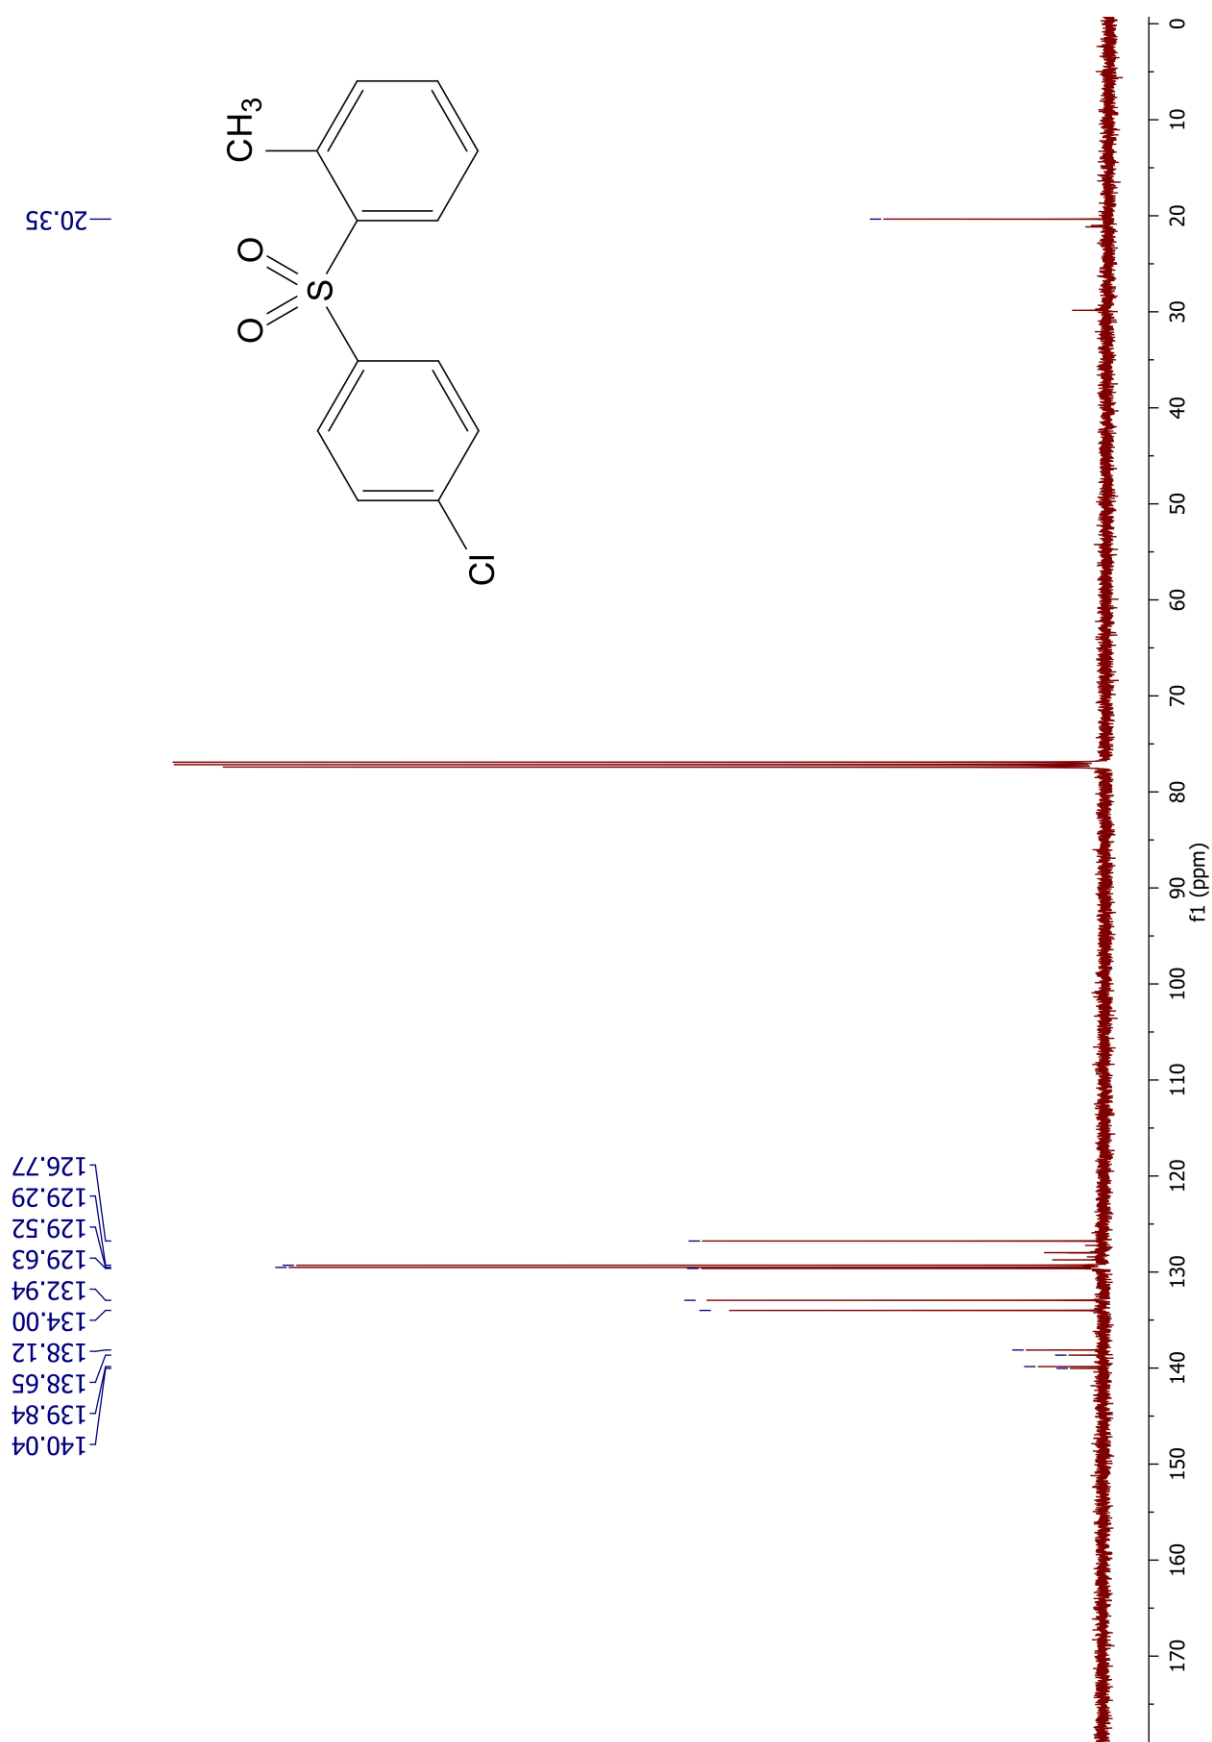

**Figure S3.** <sup>13</sup>C-NMR of 1-((4-chlorophenyl)sulfonyl)-2-methylbenzene (3c')

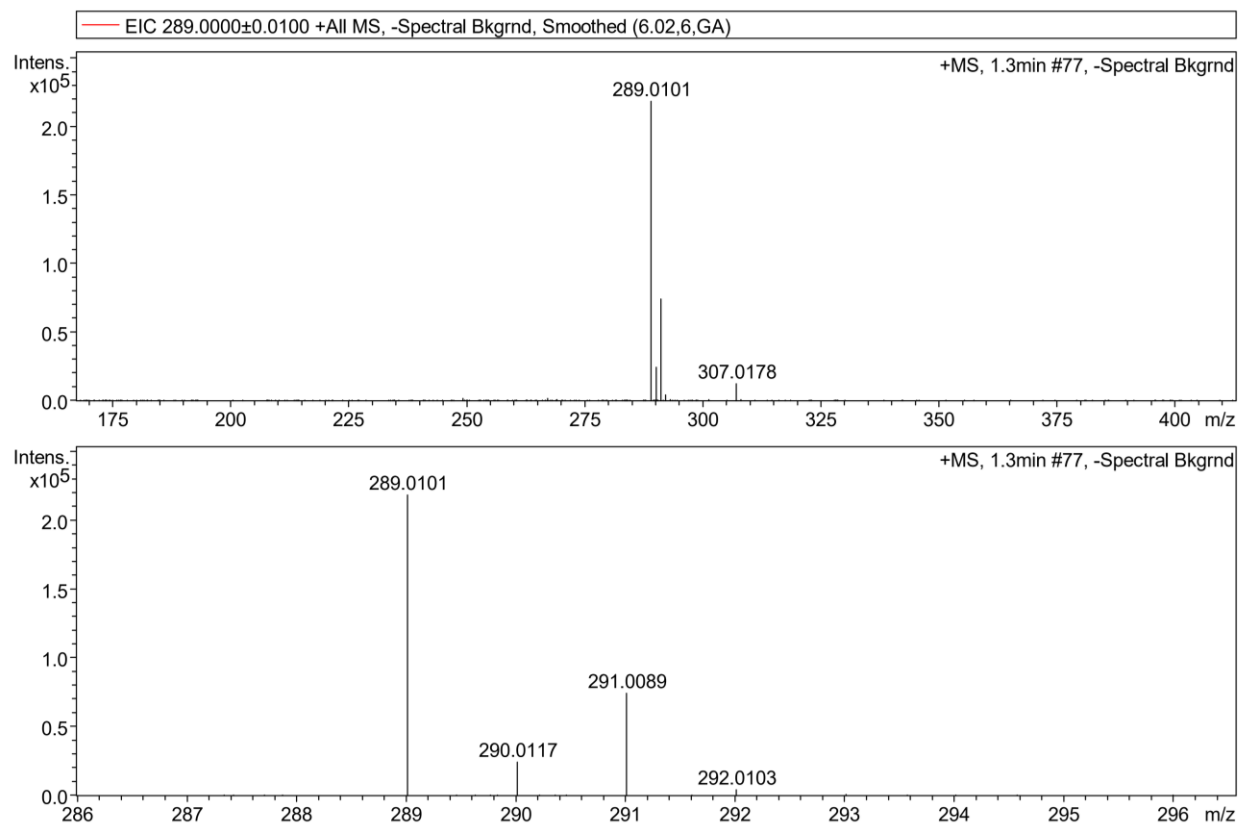

**Figure S4.** HRMS of 1-((4-chlorophenyl)sulfonyl)-2-methylbenzene (**3c'**)

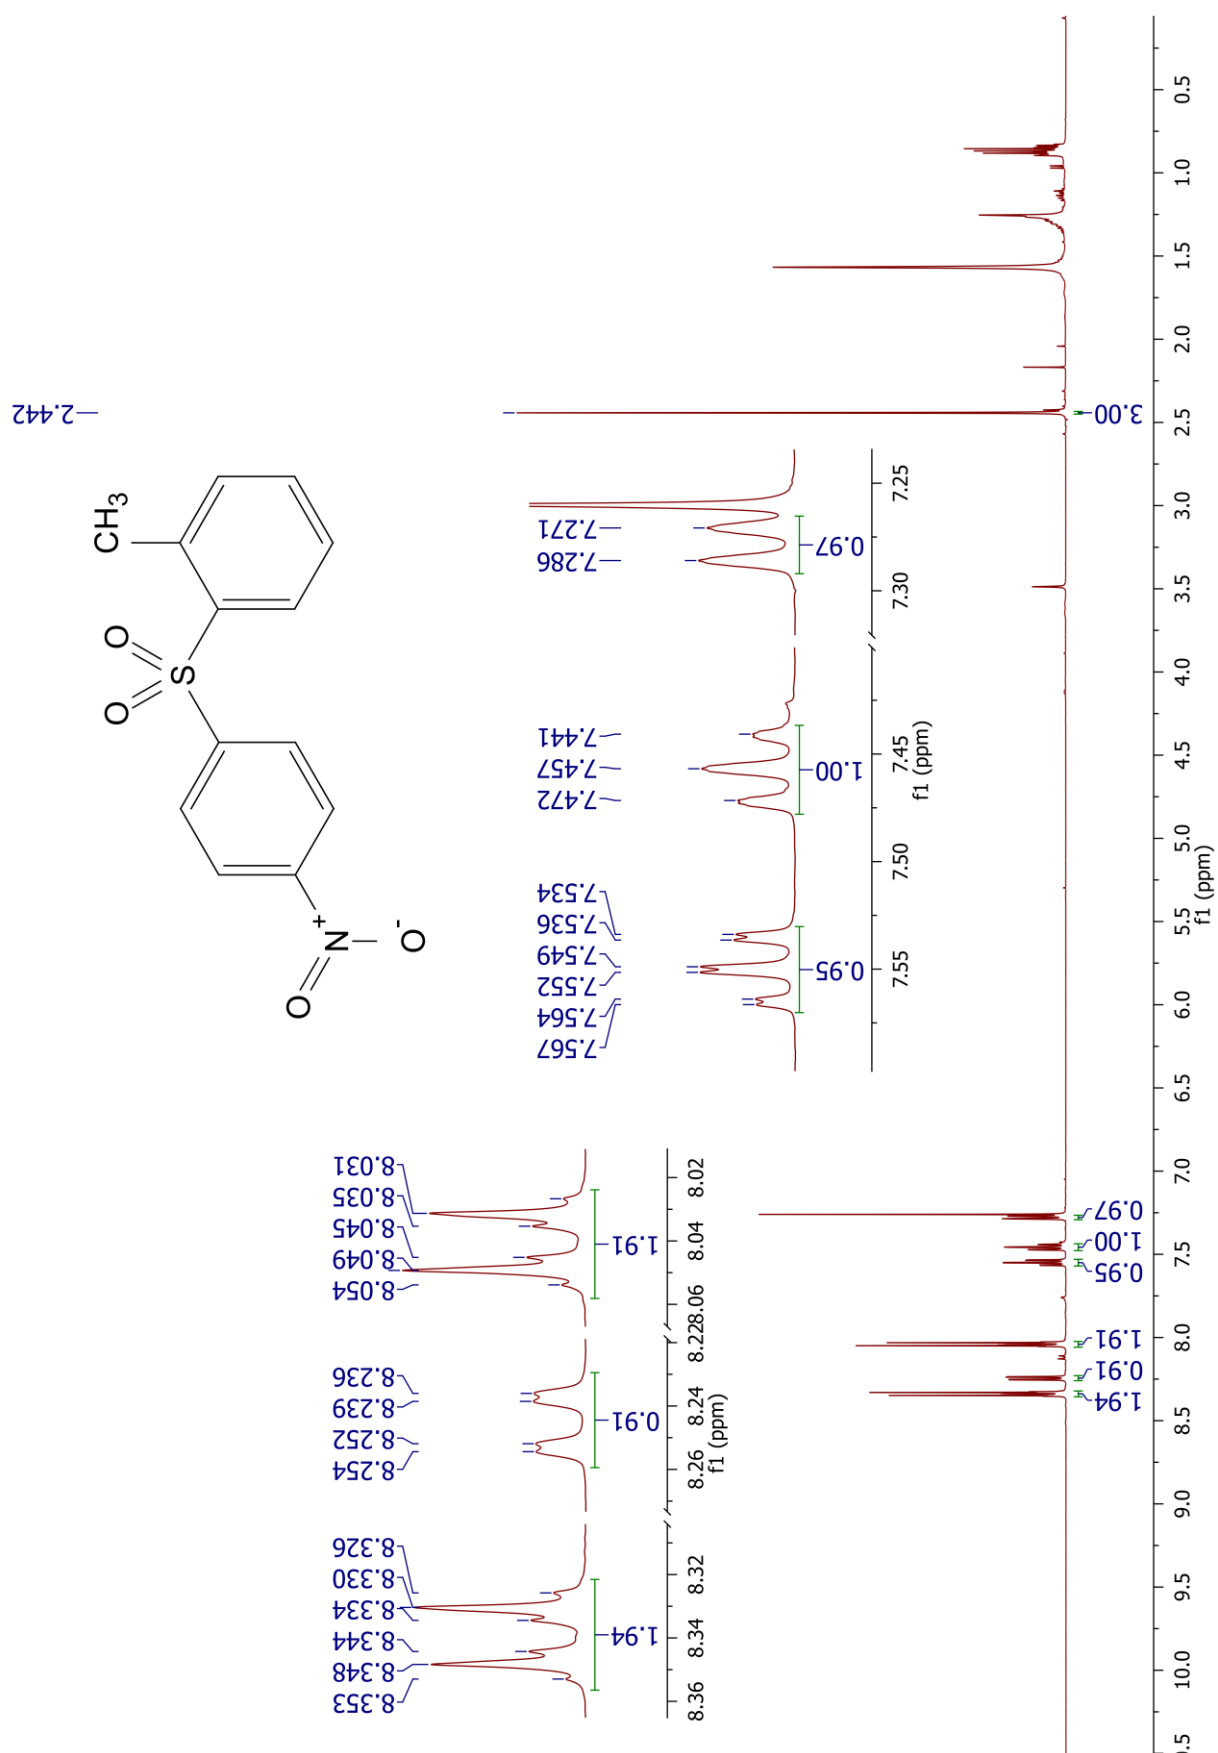

**Figure S5.** <sup>1</sup>H-NMR of 1-methyl-2-((4-nitrophenyl)sulfonyl)benzene (3d')

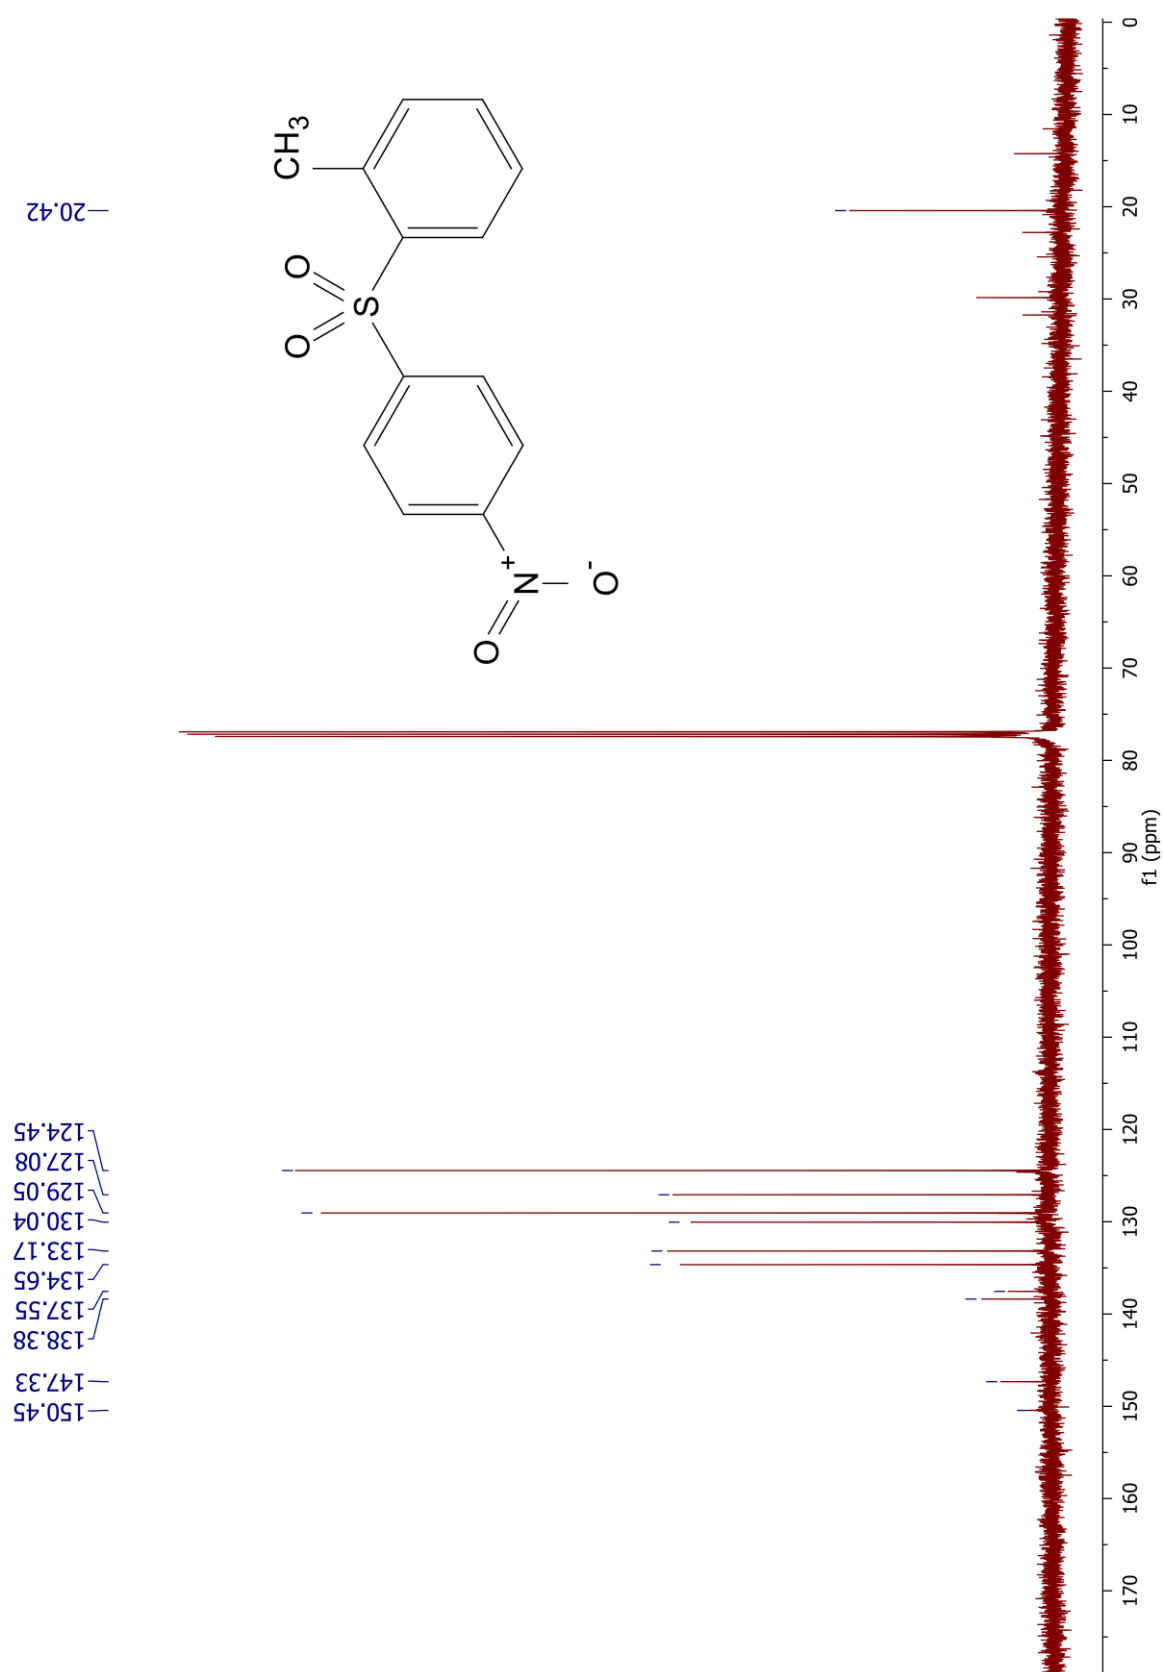

**Figure S6.** <sup>13</sup>C-NMR of 1-methyl-2-((4-nitrophenyl)sulfonyl)benzene (3d')

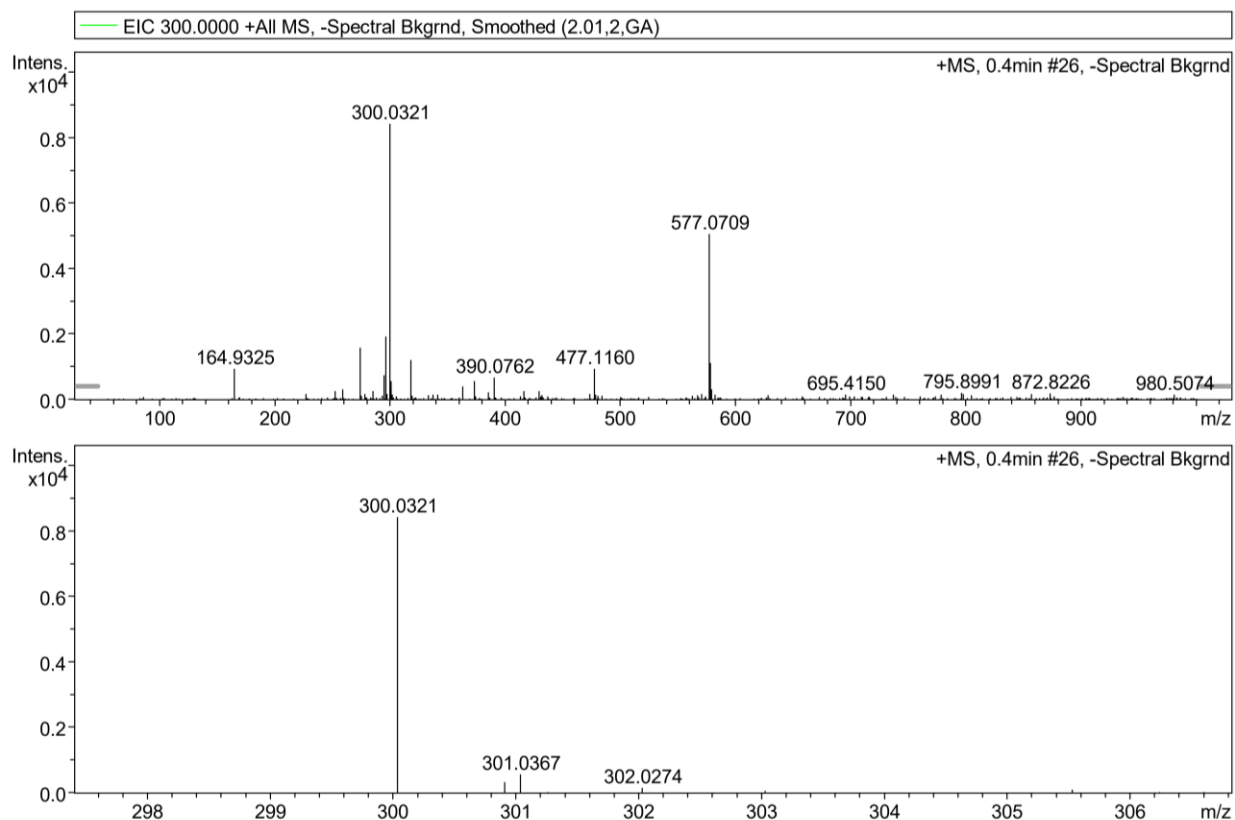

**Figure S7.** HRMS of 1-methyl-2-((4-nitrophenyl)sulfonyl)benzene (**3d'**)

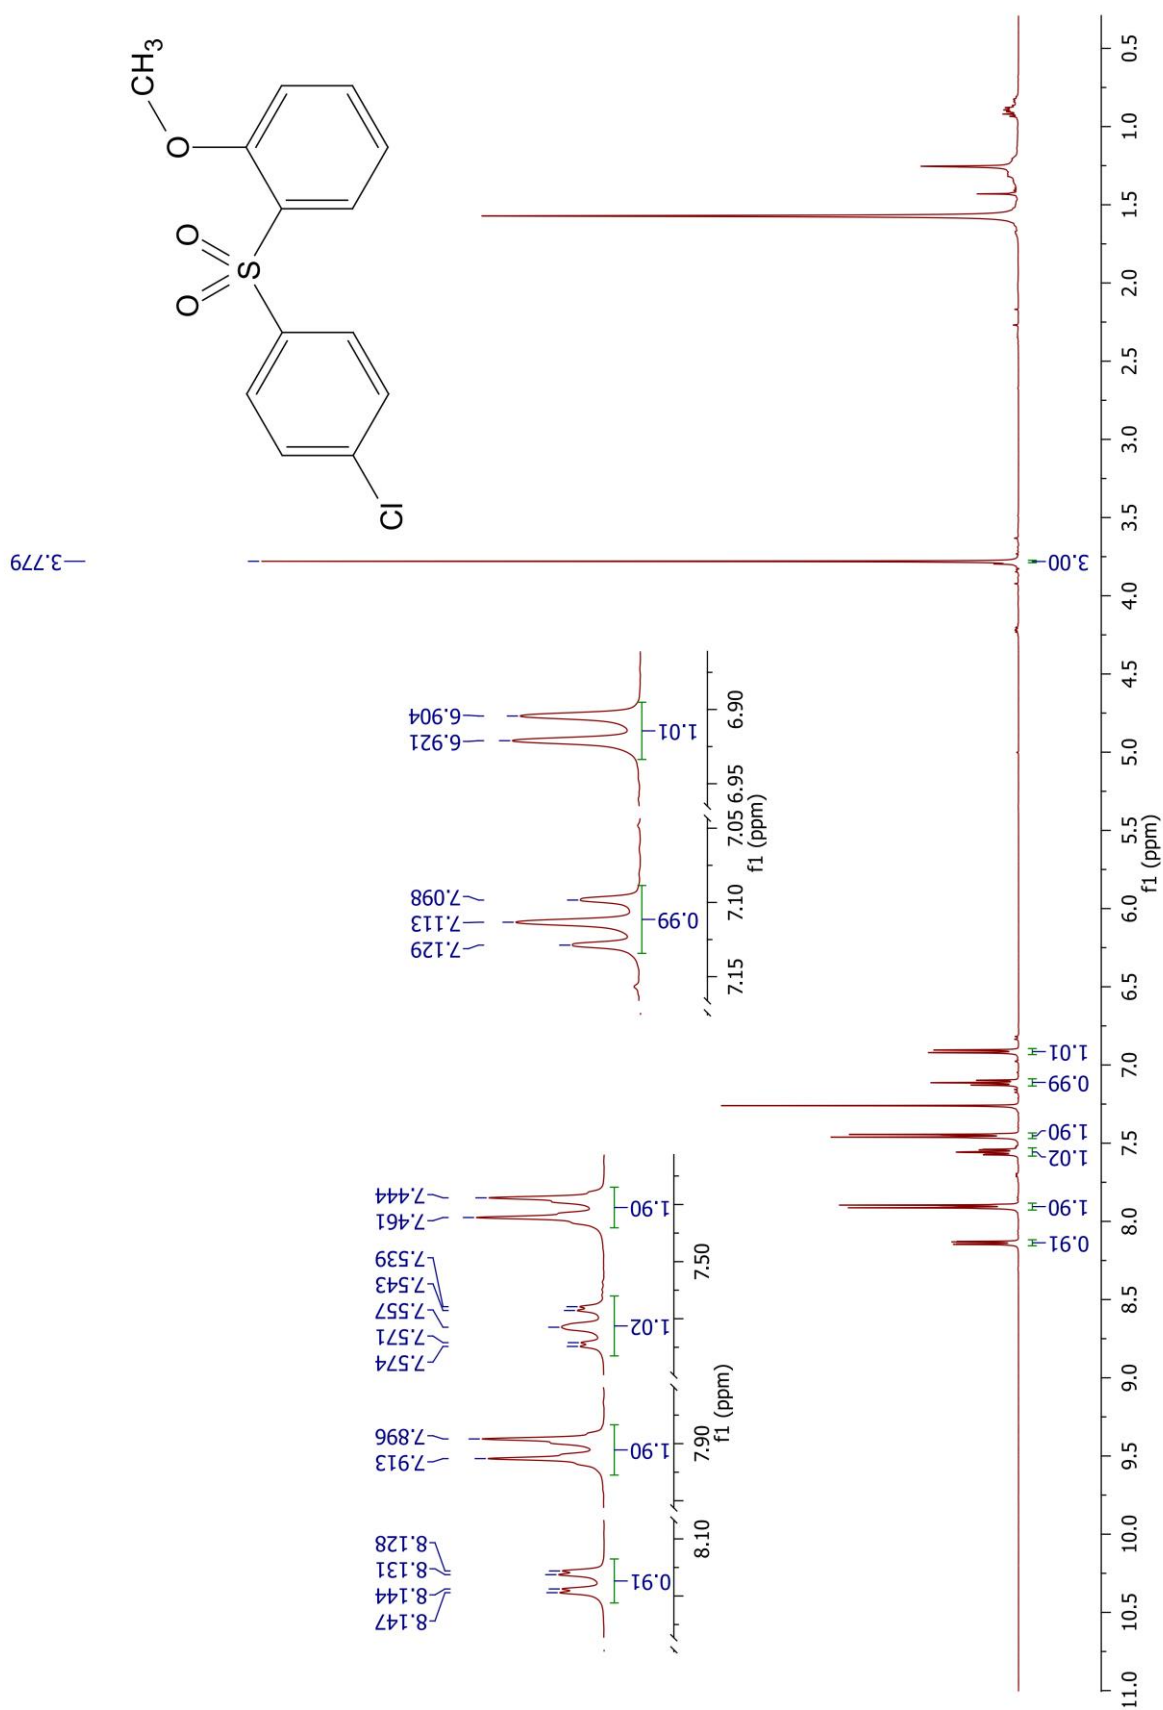

**Figure S8.** <sup>1</sup>H-NMR of 1-((4-chlorophenyl)sulfonyl)-2-methoxybenzene (3h')

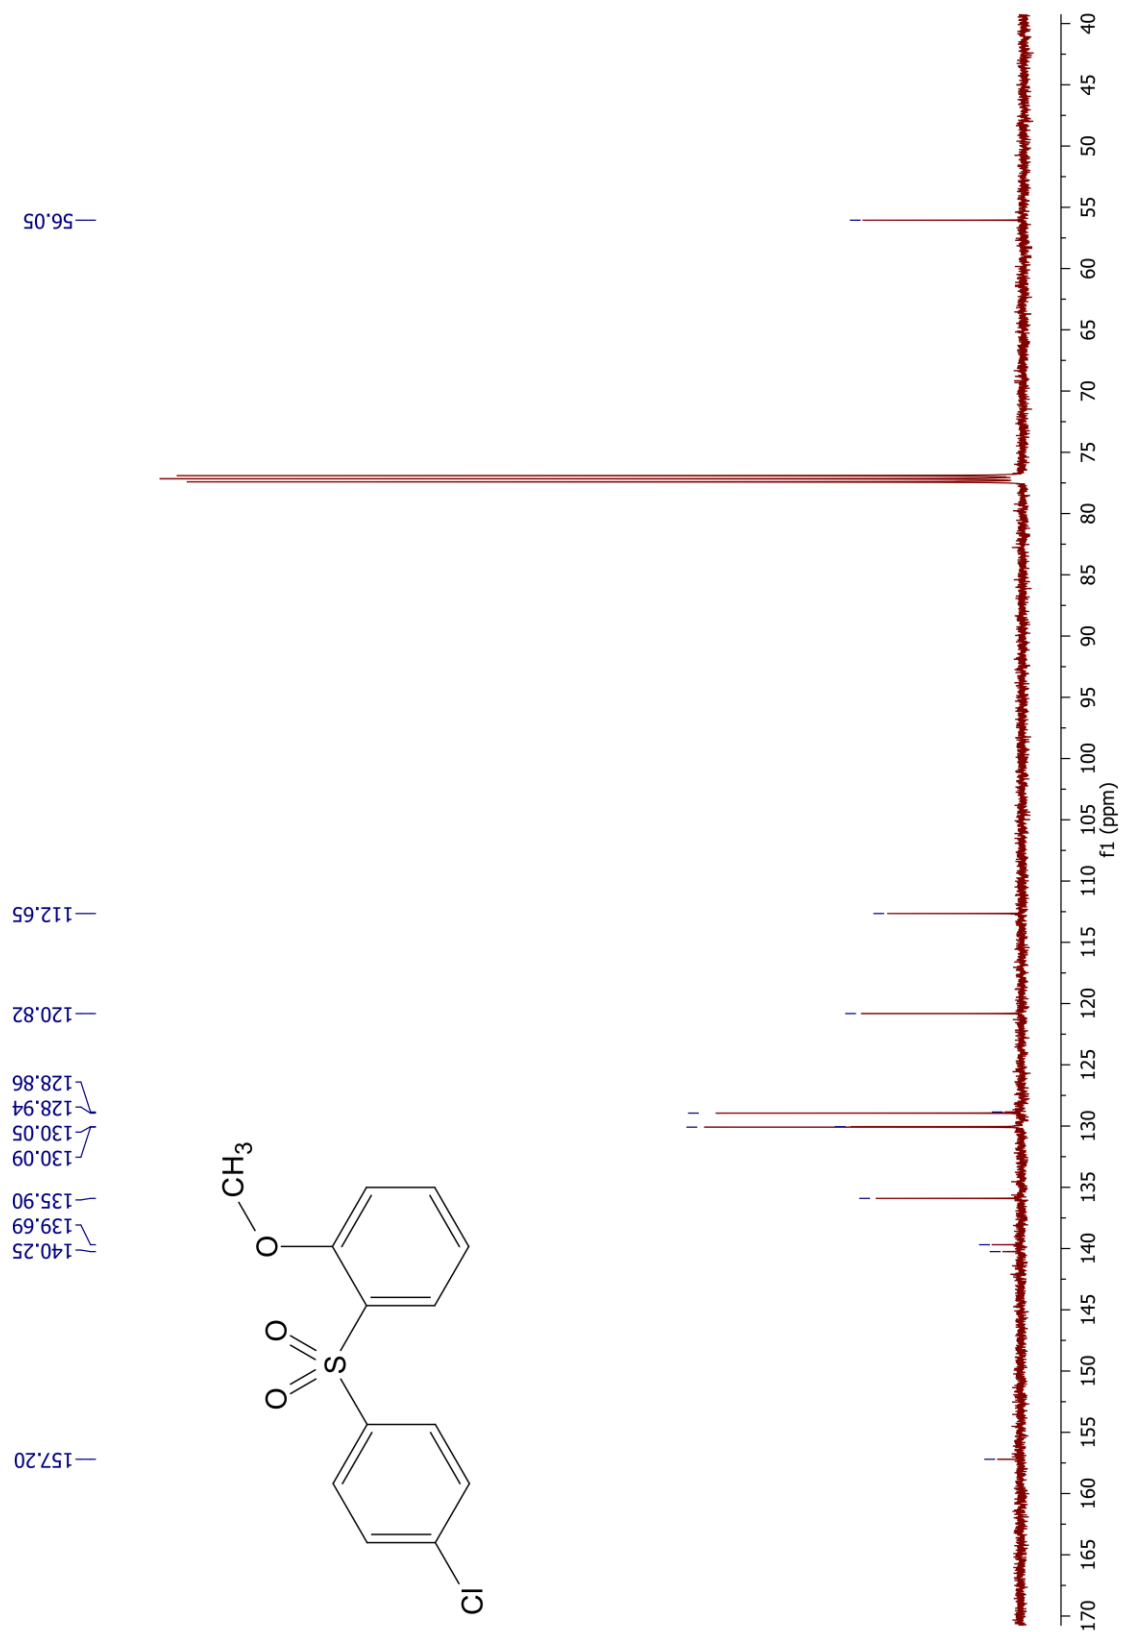

**Figure S9.**  $^{13}\text{C}$ -NMR of 1-((4-chlorophenyl)sulfonyl)-2-methoxybenzene (3h')

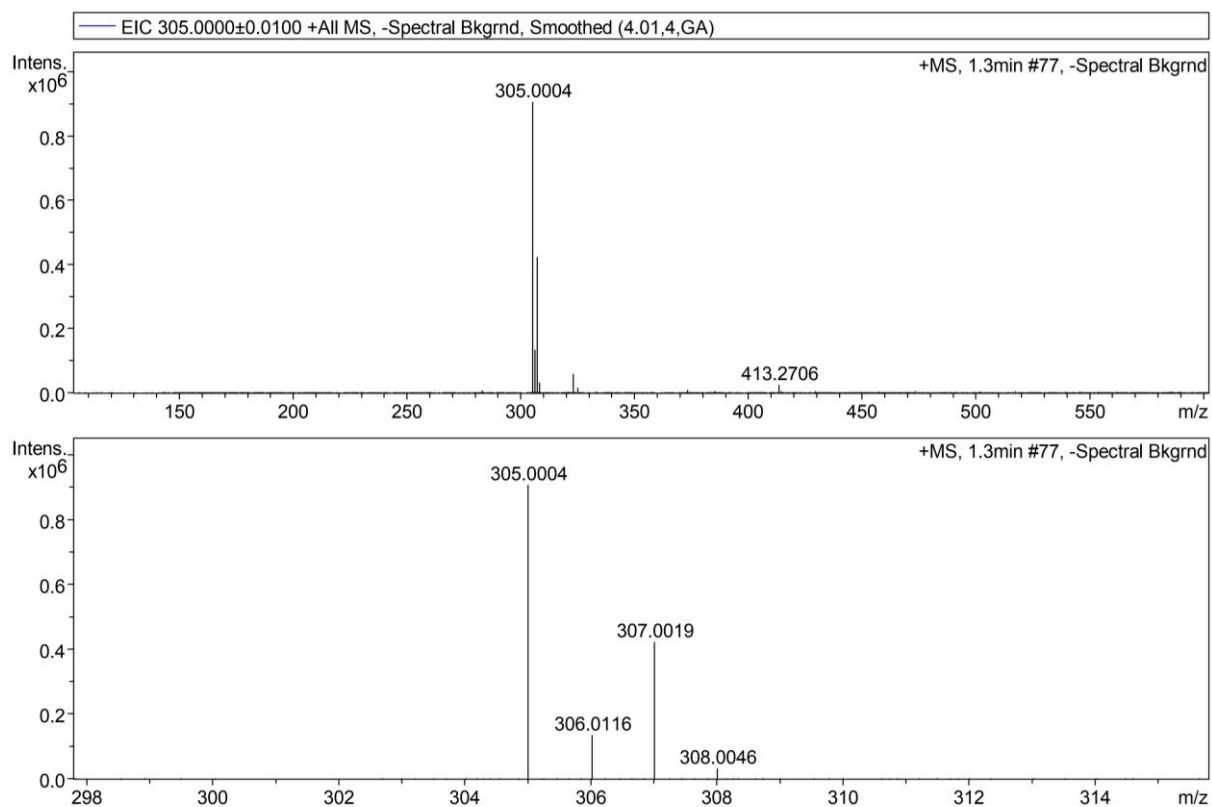

**Figure S10.** HRMS of 1-((4-chlorophenyl)sulfonyl)-2-methoxybenzene (**3h'**)



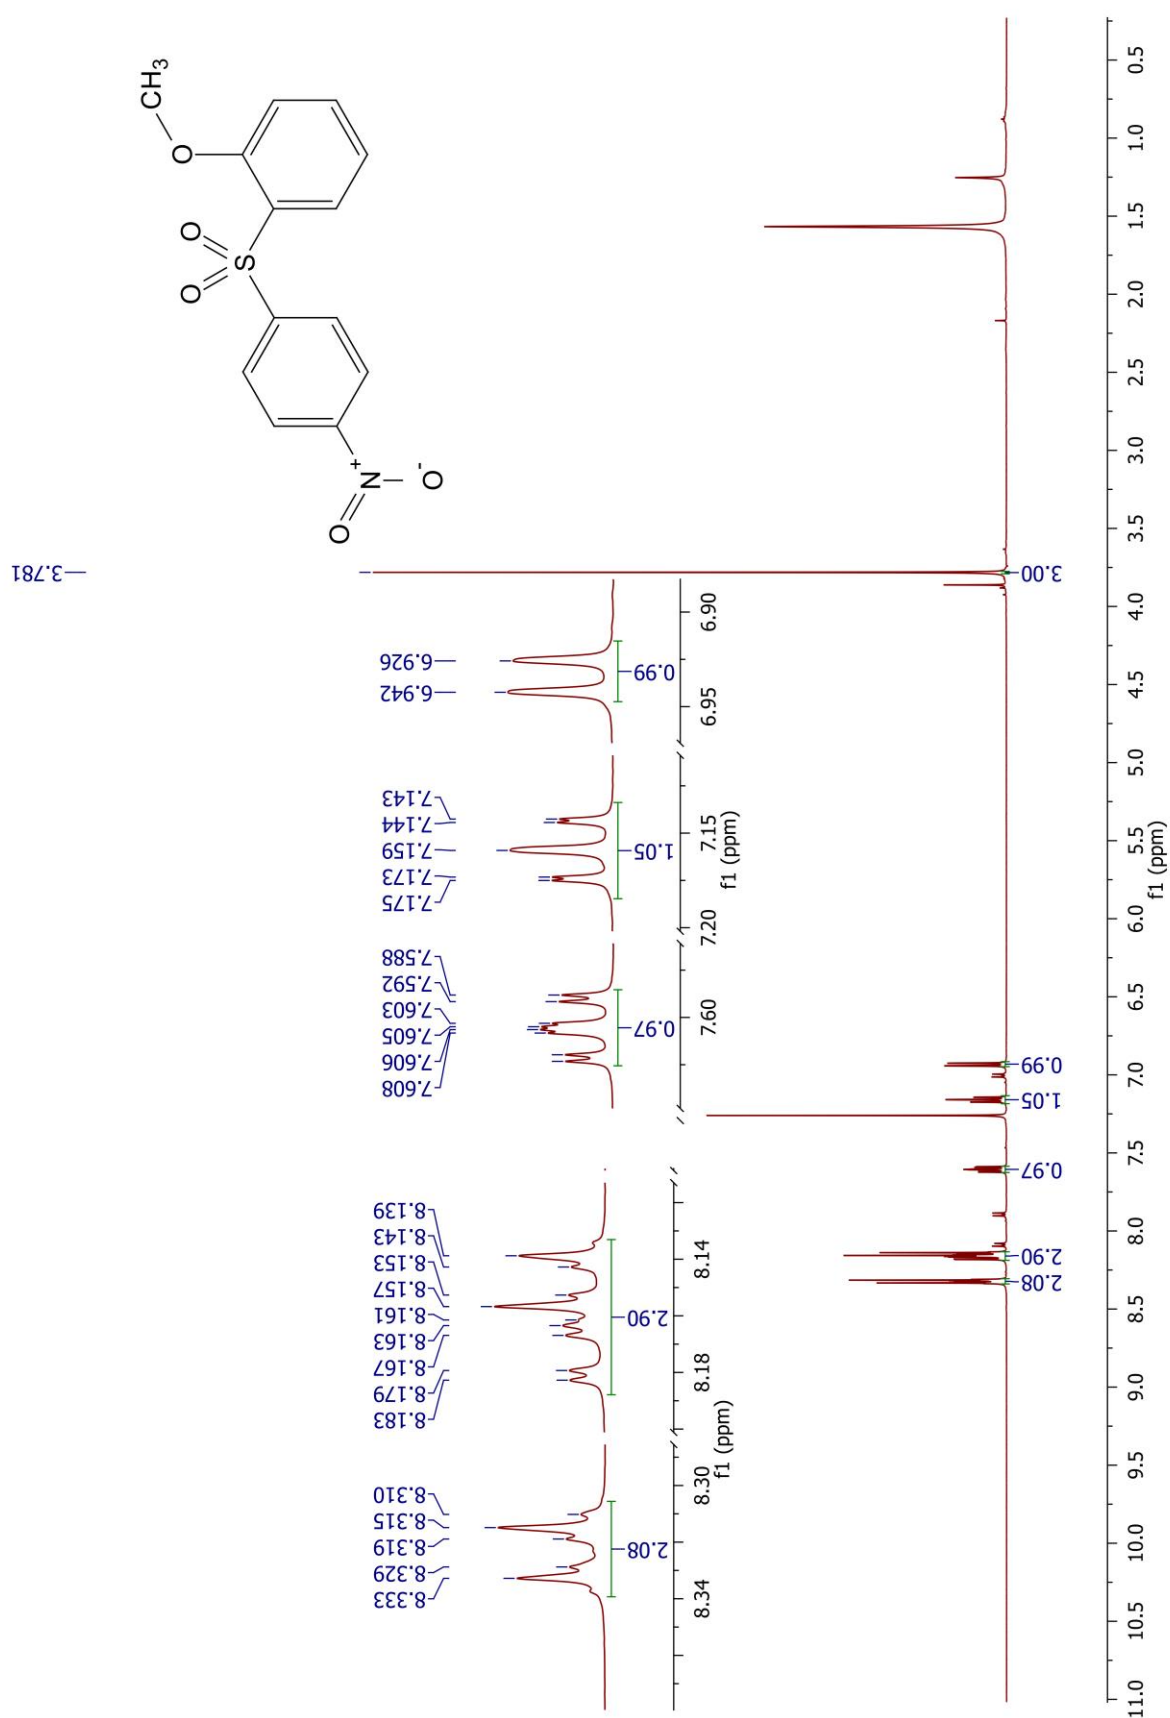

**Figure S11.** <sup>1</sup>H-NMR of 1-methoxy-2-((4-nitrophenyl)sulfonyl)benzene (**3i'**)

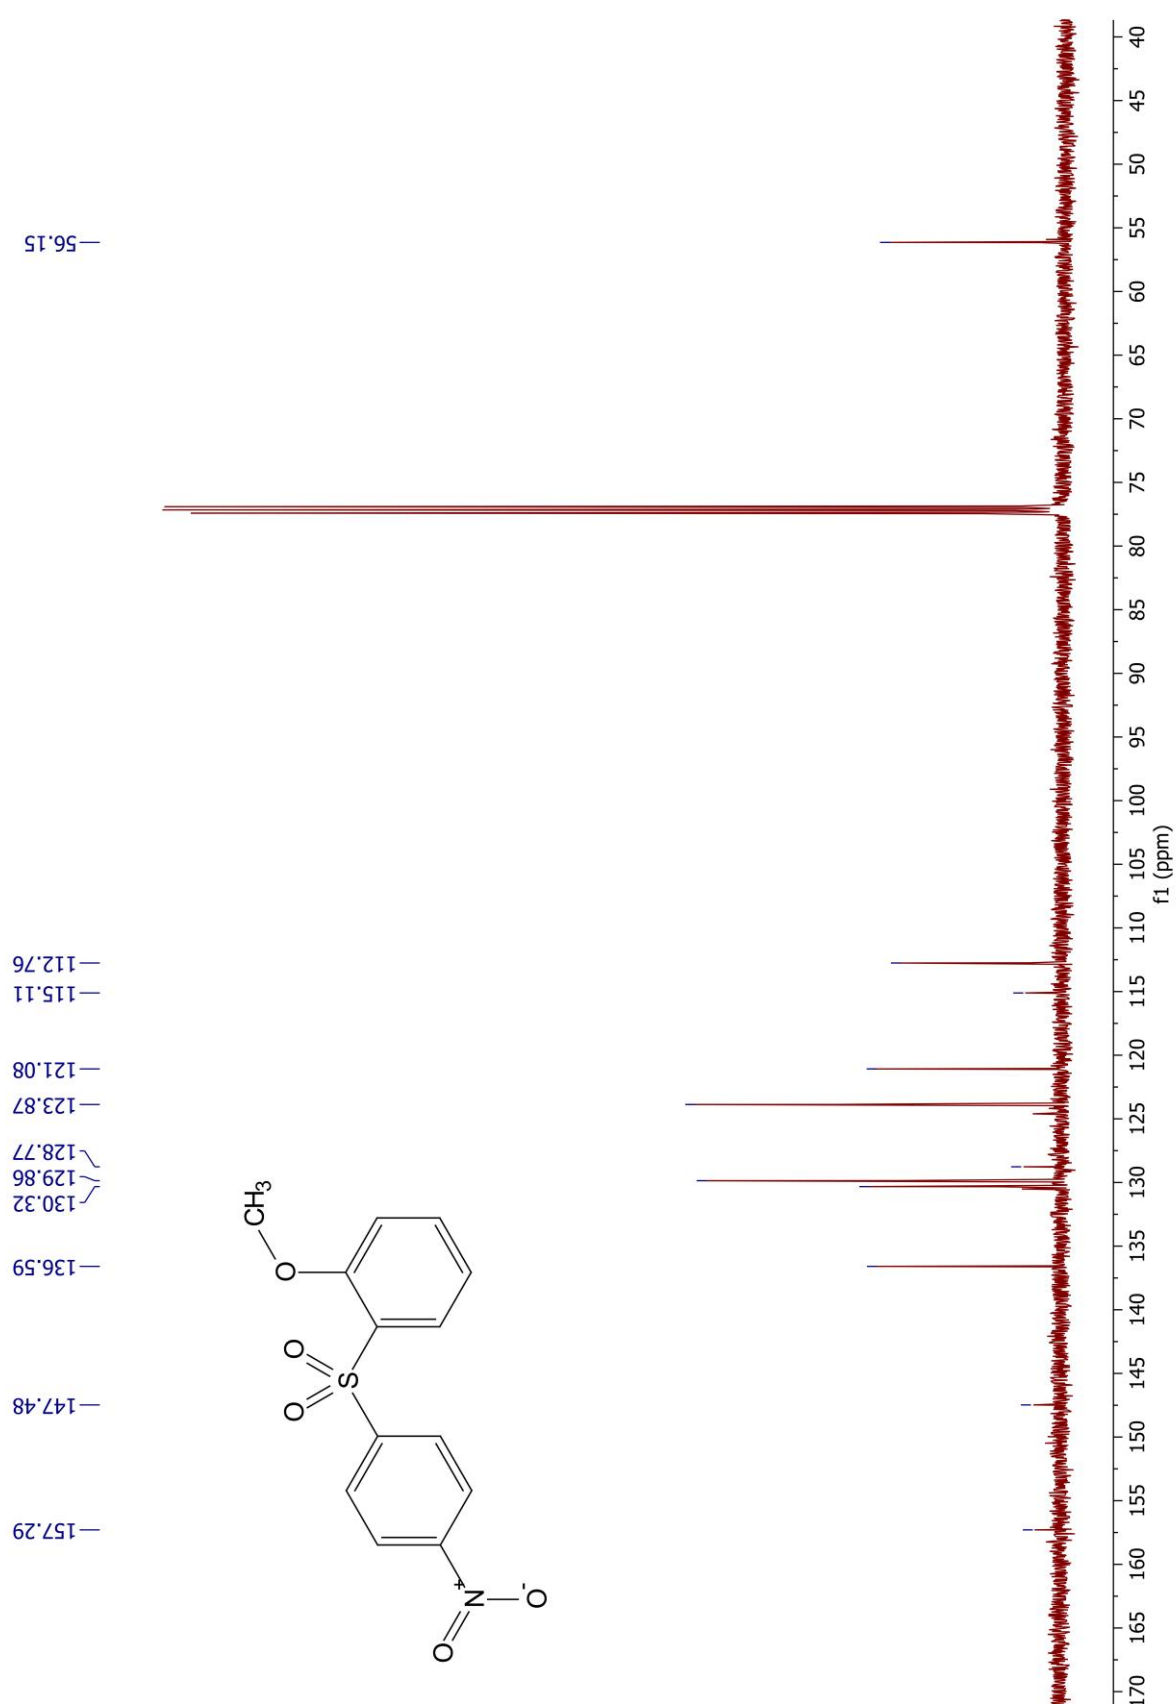

**Figure S12.**  $^{13}\text{C}$ -NMR of 1-methoxy-2-((4-nitrophenyl)sulfonyl)benzene (**3i'**)

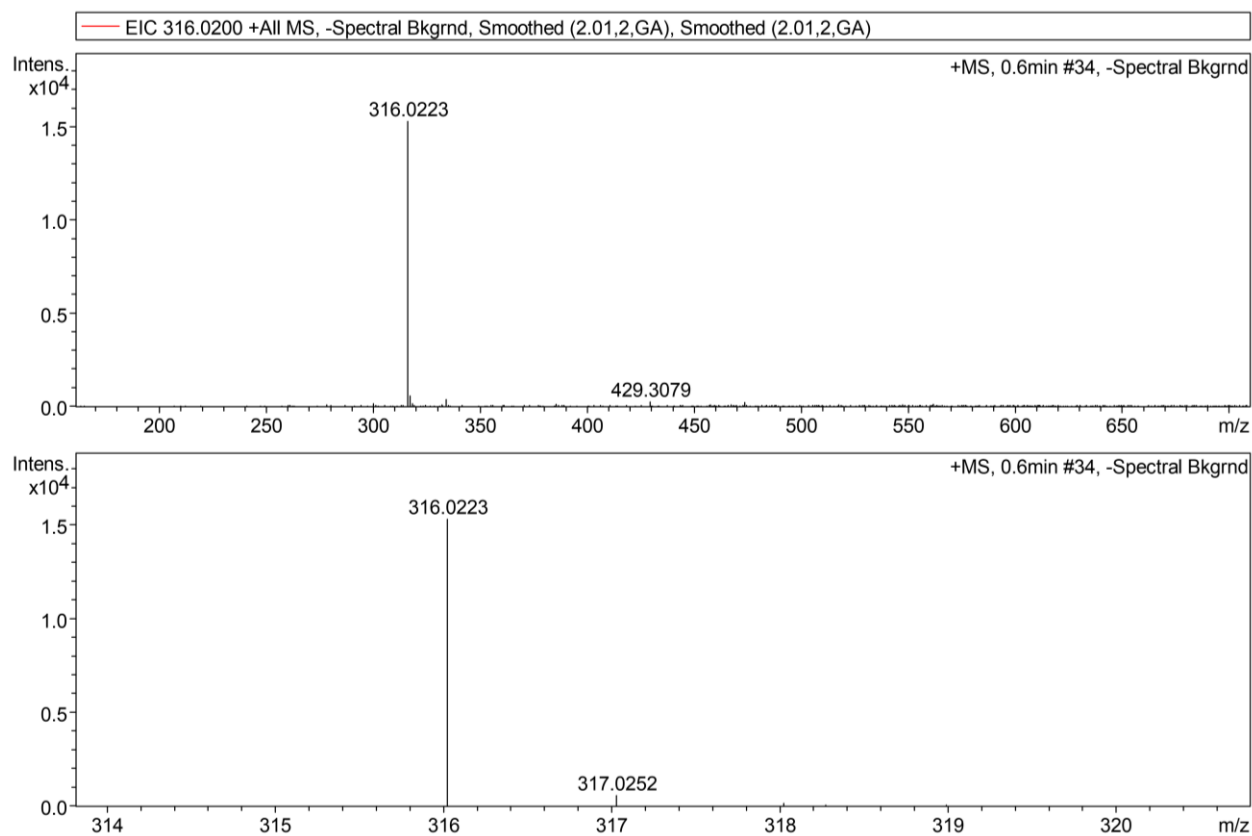

**Figure S13.** HRMS of 1-methoxy-2-((4-nitrophenyl)sulfonyl)benzene (**3i'**)

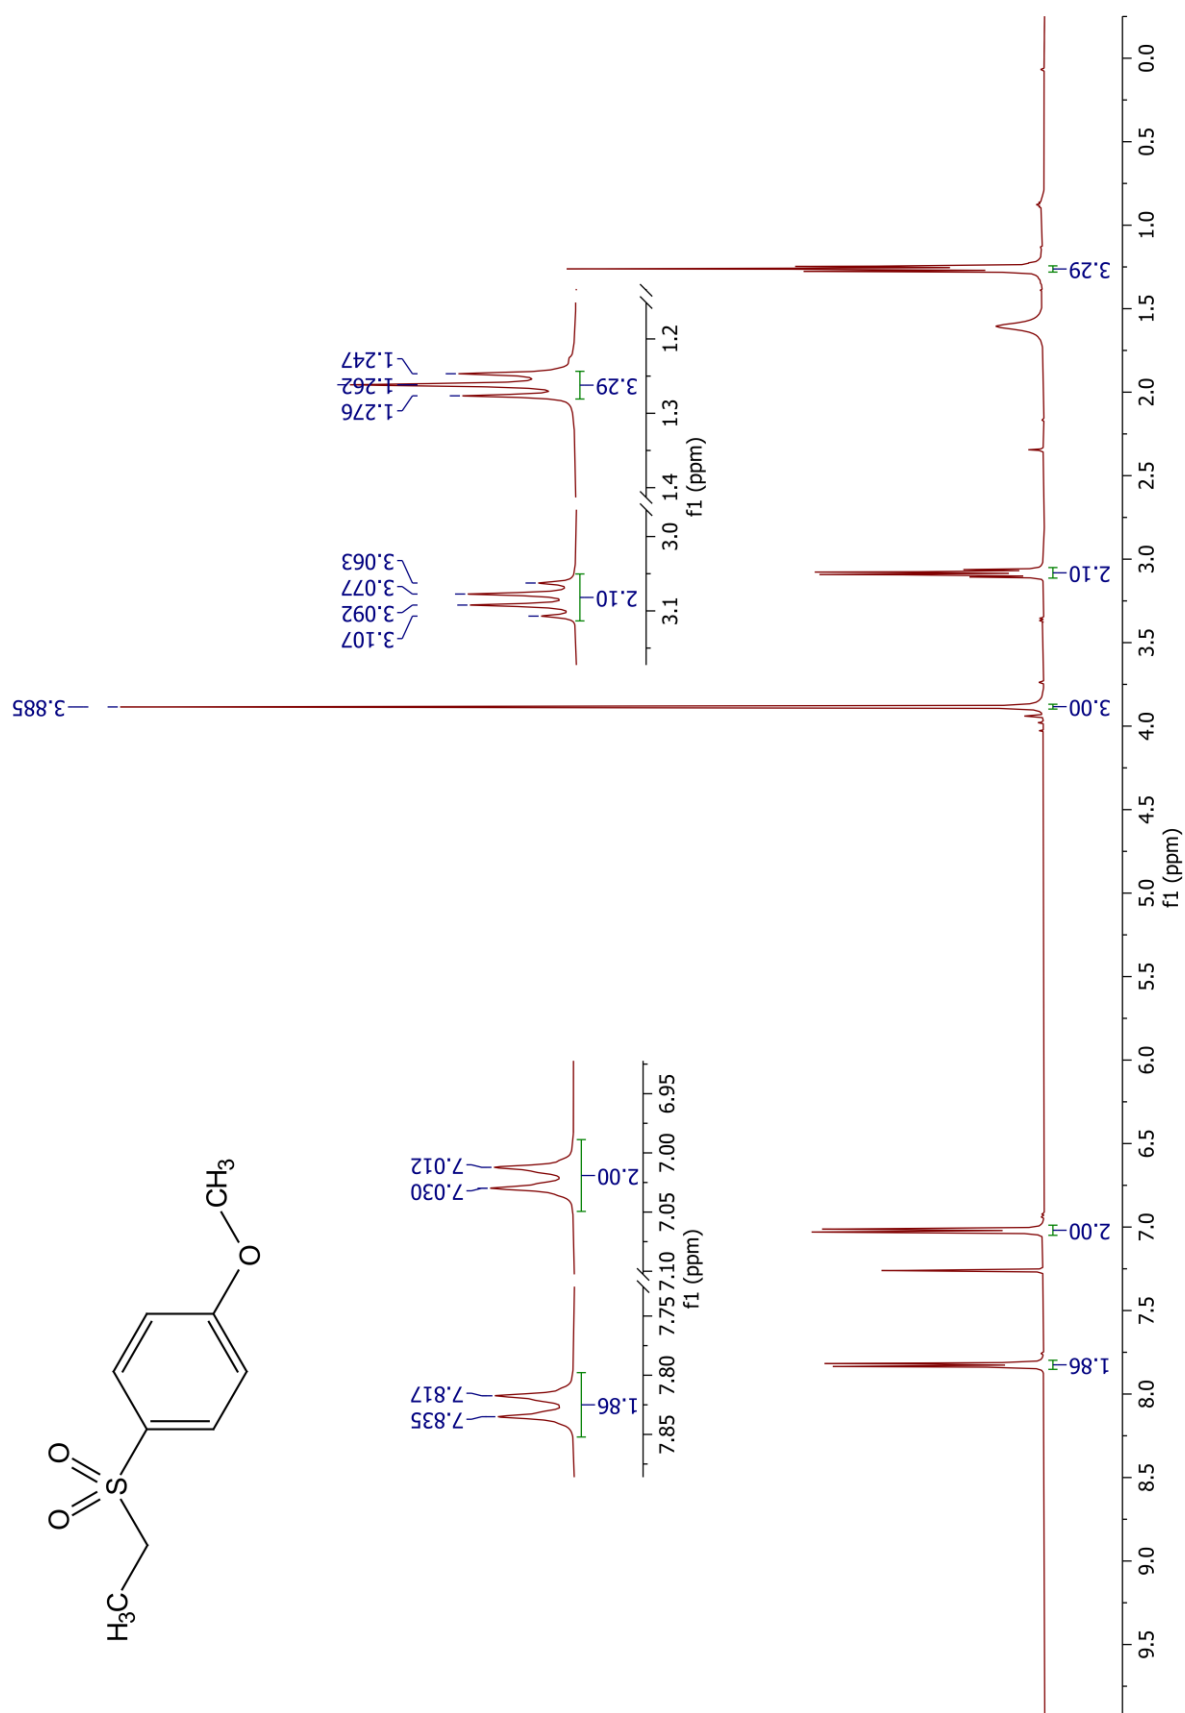

**Figure S14.** <sup>1</sup>H-NMR of 1-(ethylsulfonyl)-4-methoxybenzene (3j)

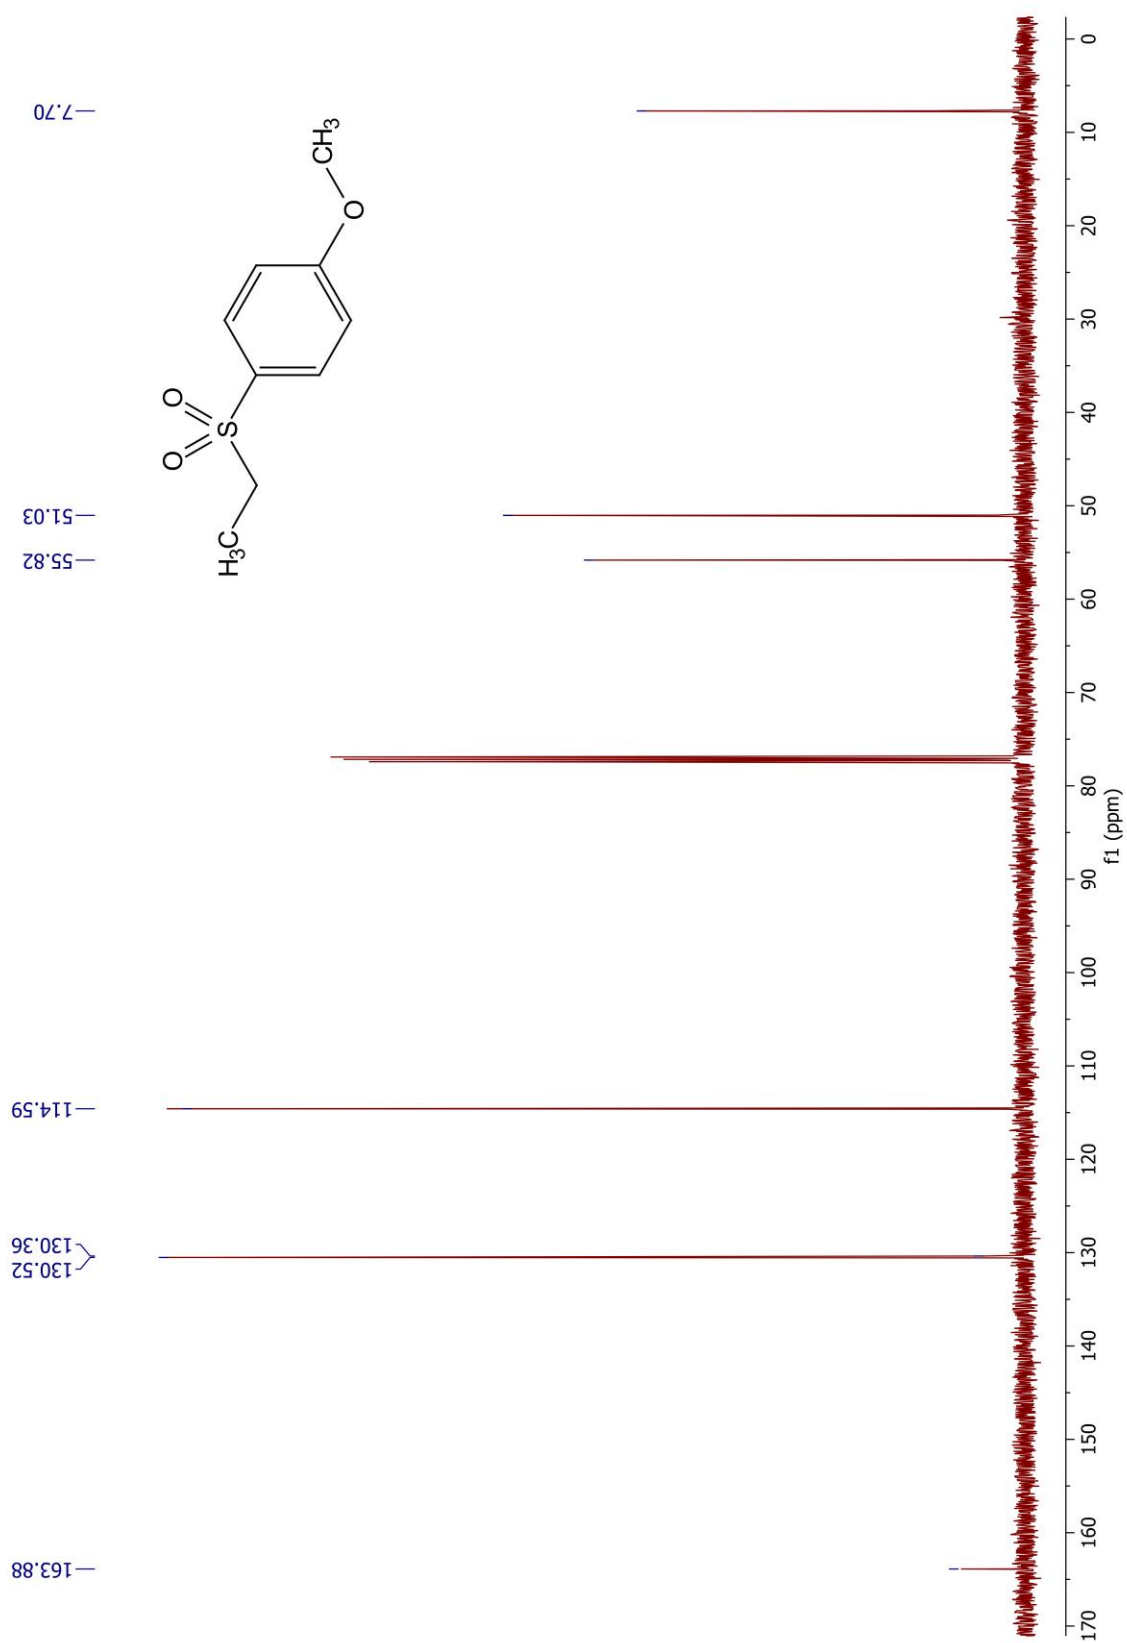

**Figure S15.** <sup>13</sup>C-NMR of 1-(ethylsulfonyl)-4-methoxybenzene (3j)

### Full mass spectrum

Spectrum from ETHAN-P\_(+).wiff2 (sample 1) - ETHAN-P\_(+).ESI, +TOF MS (50 - 1500) from 0.153 min, noise filtered (noise multiplier = 1.5), Gaussian smoothed (0.5 points)

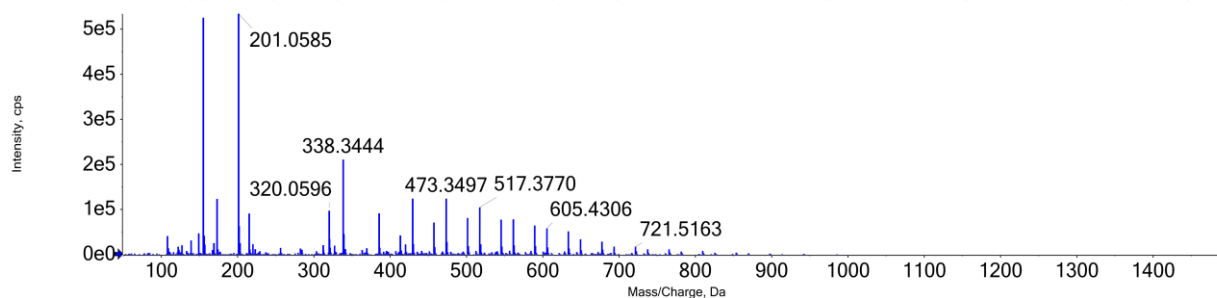

### Expanded spectrum

Spectrum from ETHAN-P\_(+).wiff2 (sample 1) - ETHAN-P\_(+).ESI, +TOF MS (50 - 1500) from 0.153 min, noise filtered (noise multiplier = 1.5), Gaussian smoothed (0.5 points)

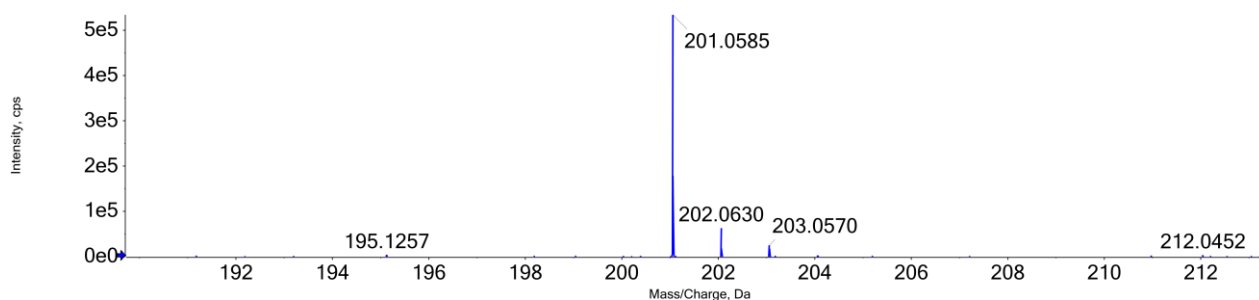

**Figure S16.** HRMS of 1-(ethylsulfonyl)-4-methoxybenzene (**3j**)

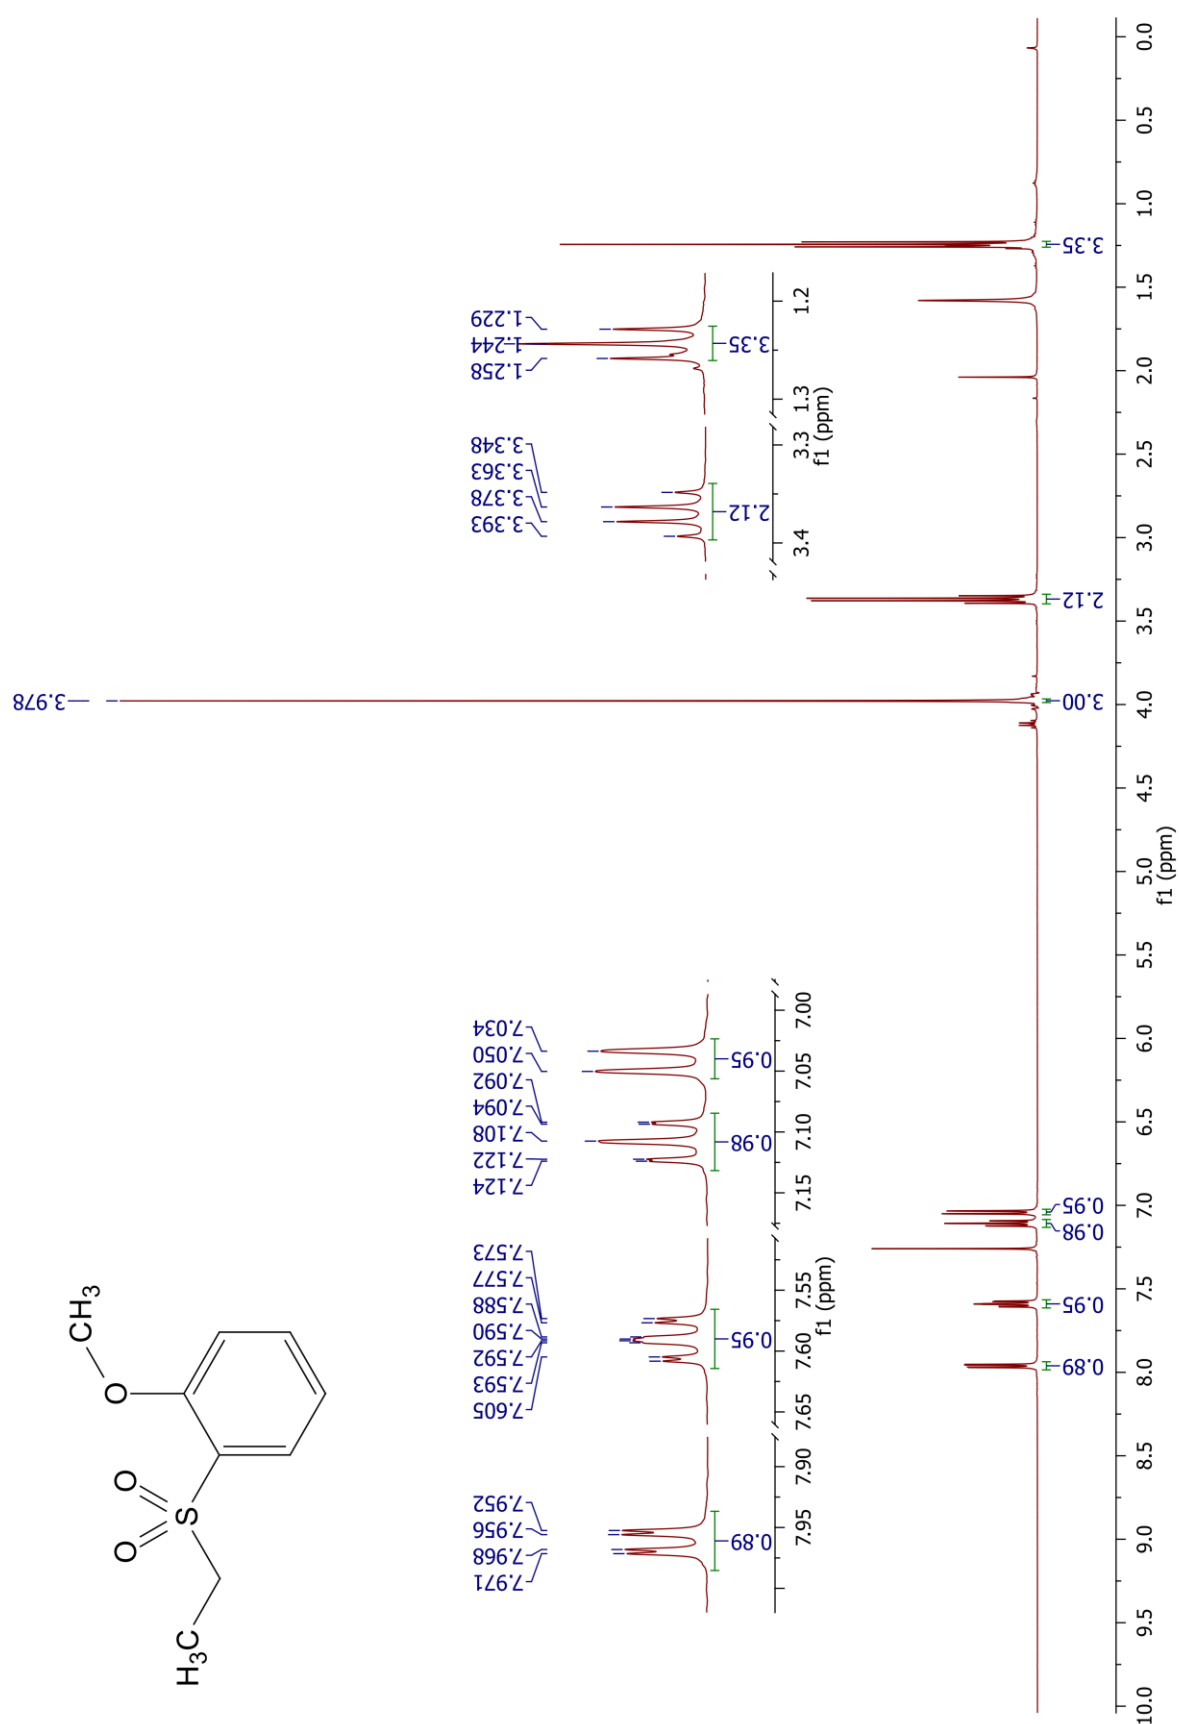

**Figure S17.** <sup>1</sup>H-NMR of 1-(ethylsulfonyl)-2-methoxybenzene (3j')

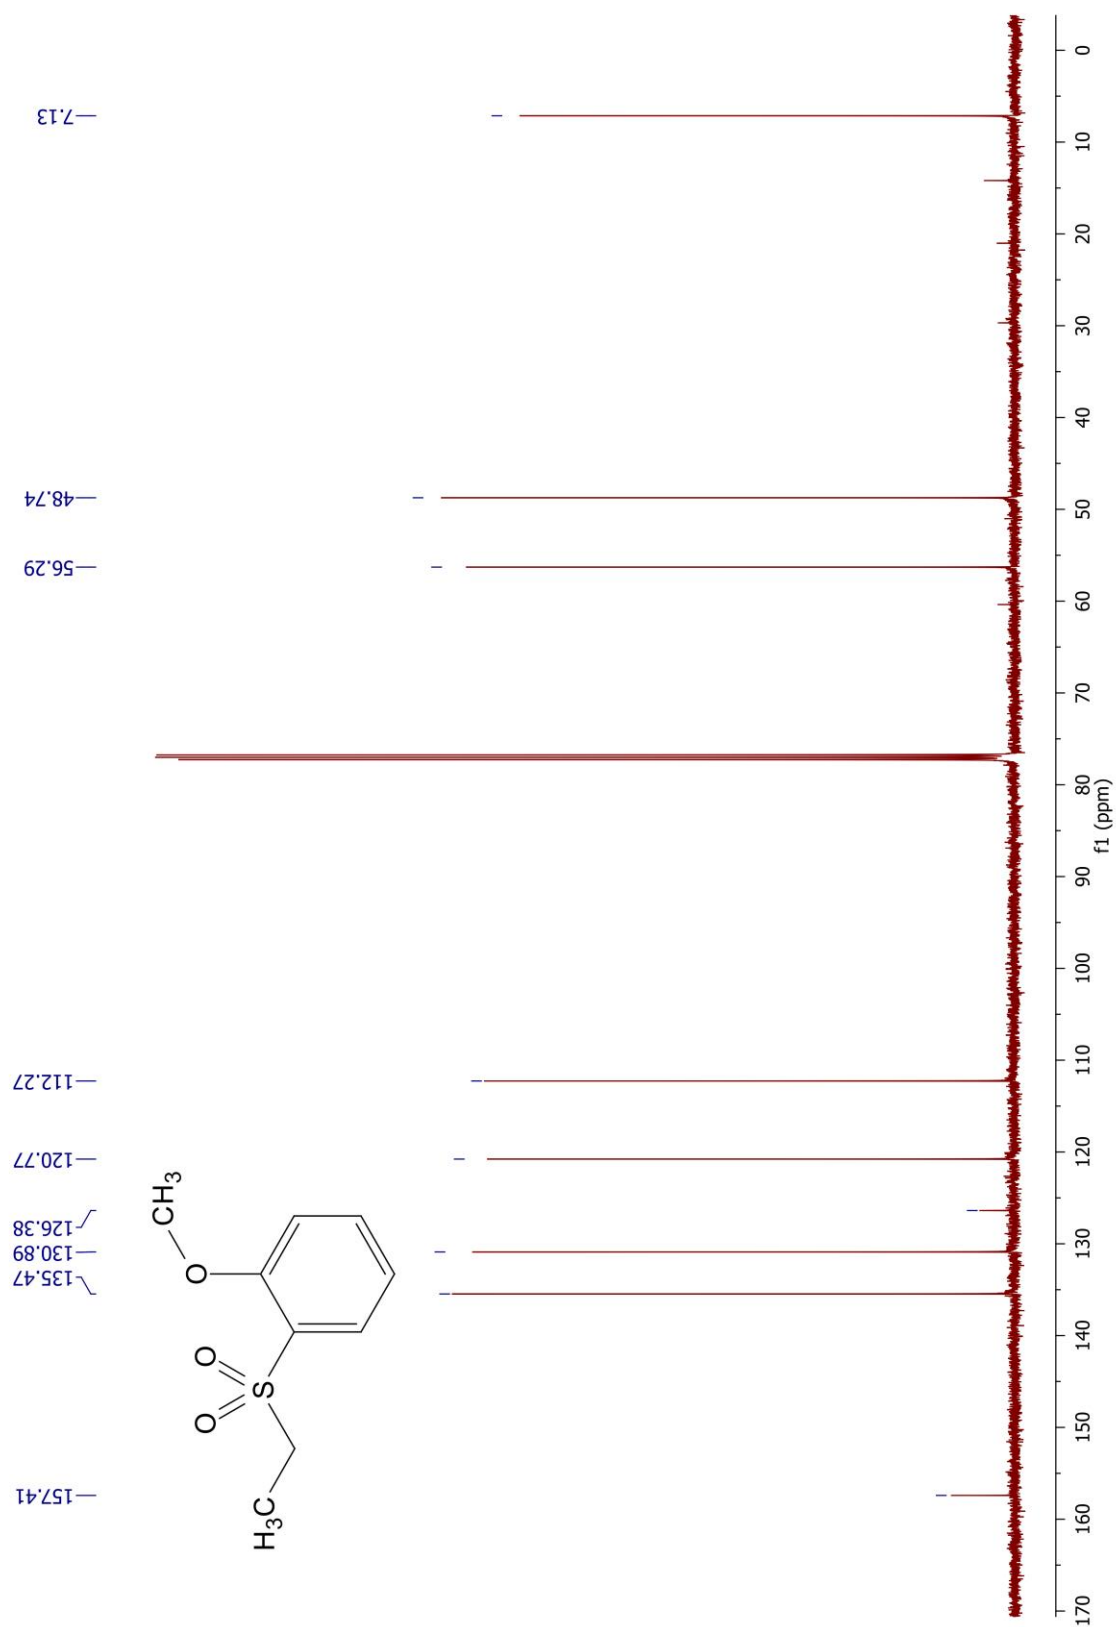

**Figure S18.**  $^{13}\text{C}$ -NMR of 1-(ethylsulfonyl)-2-methoxybenzene (**3j'**)



### Full mass spectrum

Spectrum from ETHAN-O\_(+)ESI.wiff2 (sample 1) - ETHAN-O\_(+)ESI, +TOF MS (50 - 1500) from 0.148 min, noise filtered (noise multiplier = 1.5), Gaussian smoothed (0.5 points)

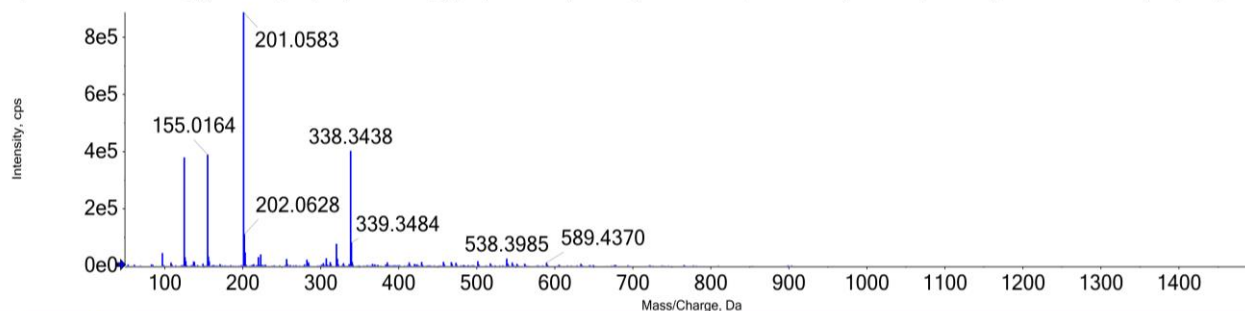

### Expanded spectrum

Spectrum from ETHAN-O\_(+)ESI.wiff2 (sample 1) - ETHAN-O\_(+)ESI, +TOF MS (50 - 1500) from 0.148 min, noise filtered (noise multiplier = 1.5), Gaussian smoothed (0.5 points)

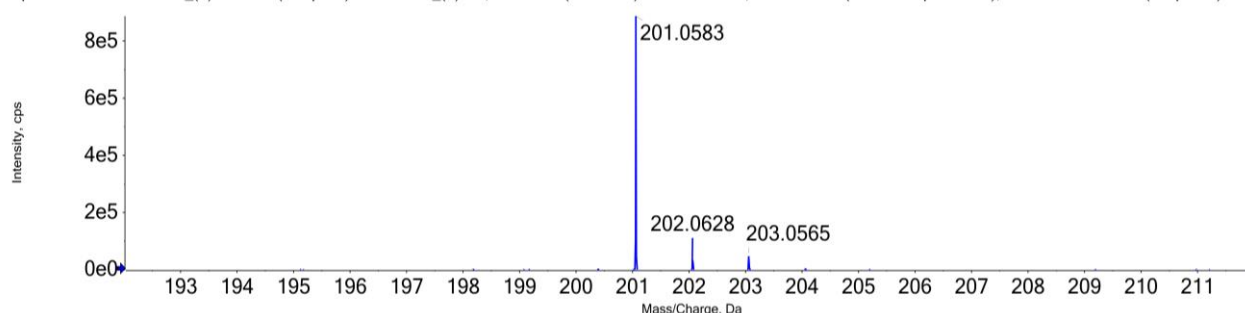

**Figure S19.** HRMS of 1-(ethylsulfonyl)-2-methoxybenzene (**3j'**)

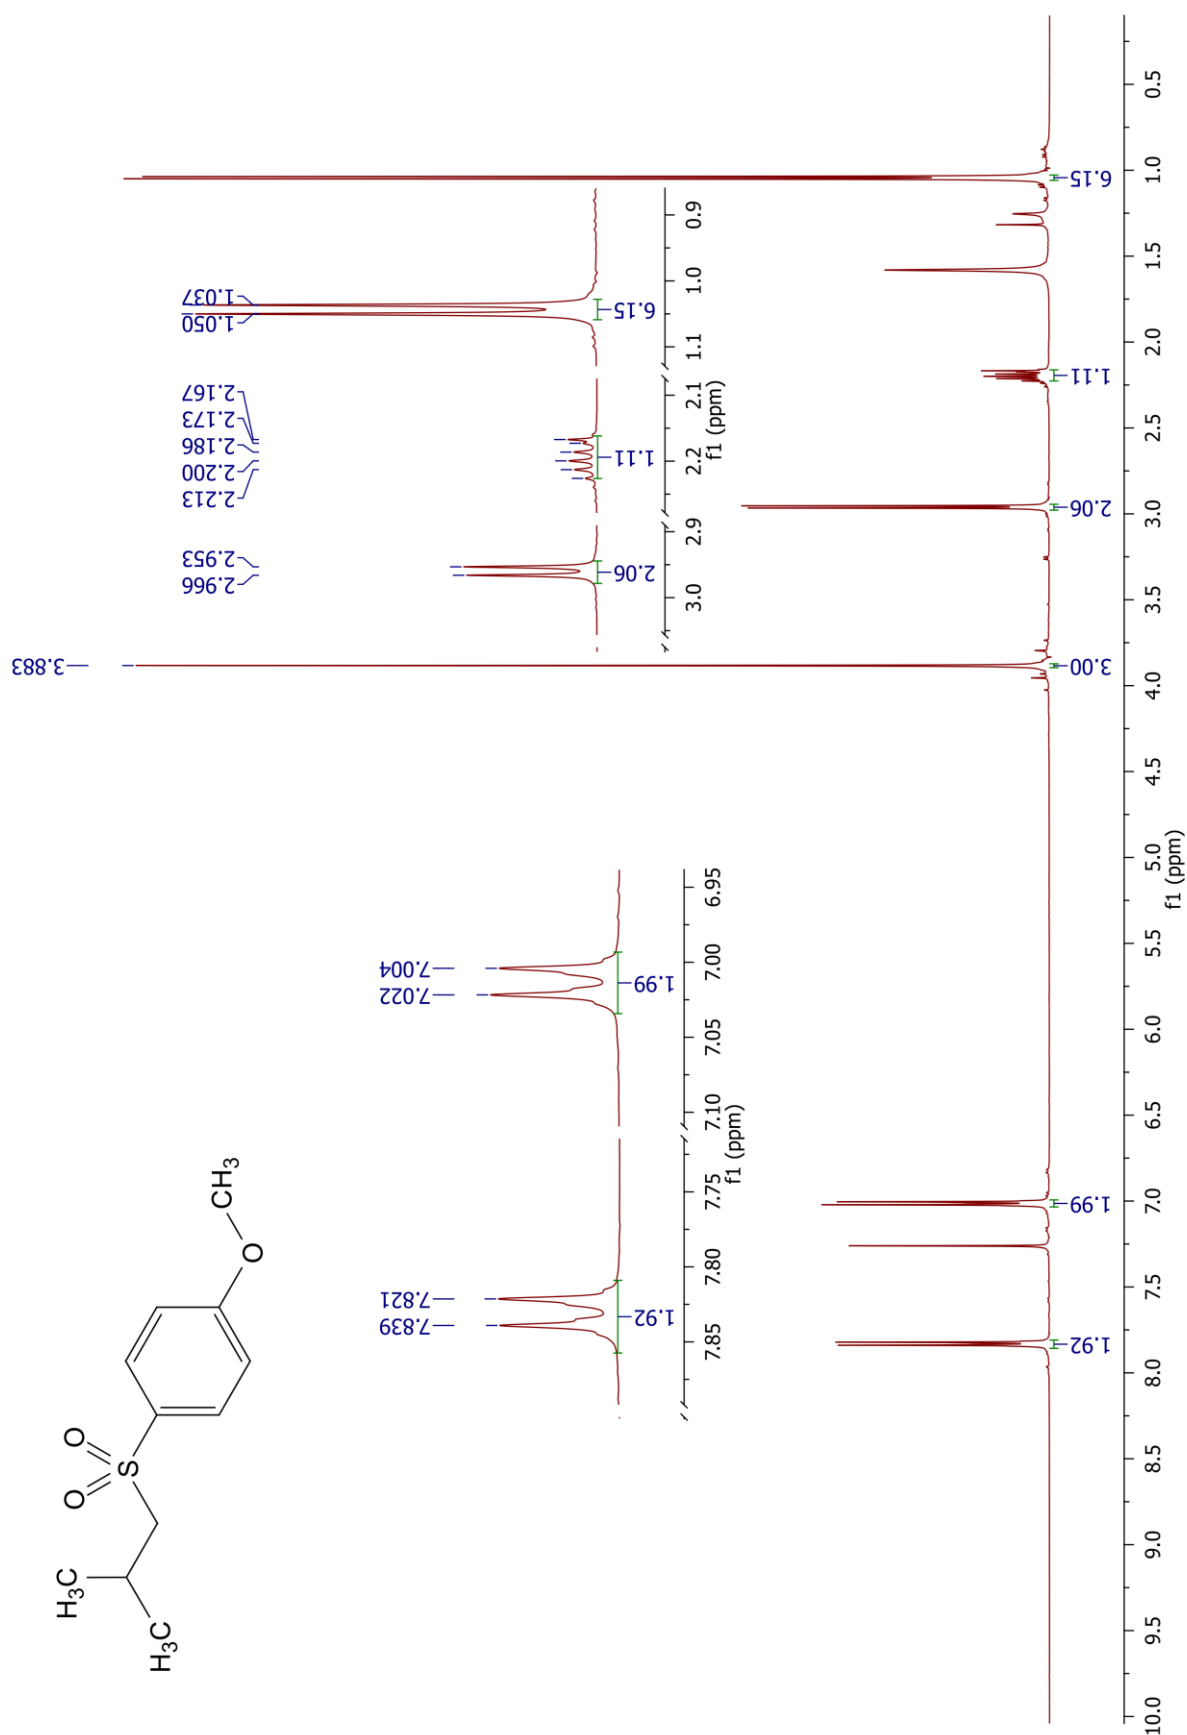

**Figure S20.** <sup>1</sup>H-NMR of 1-(isobutylsulfonyl)-4-methoxybenzene (3k)

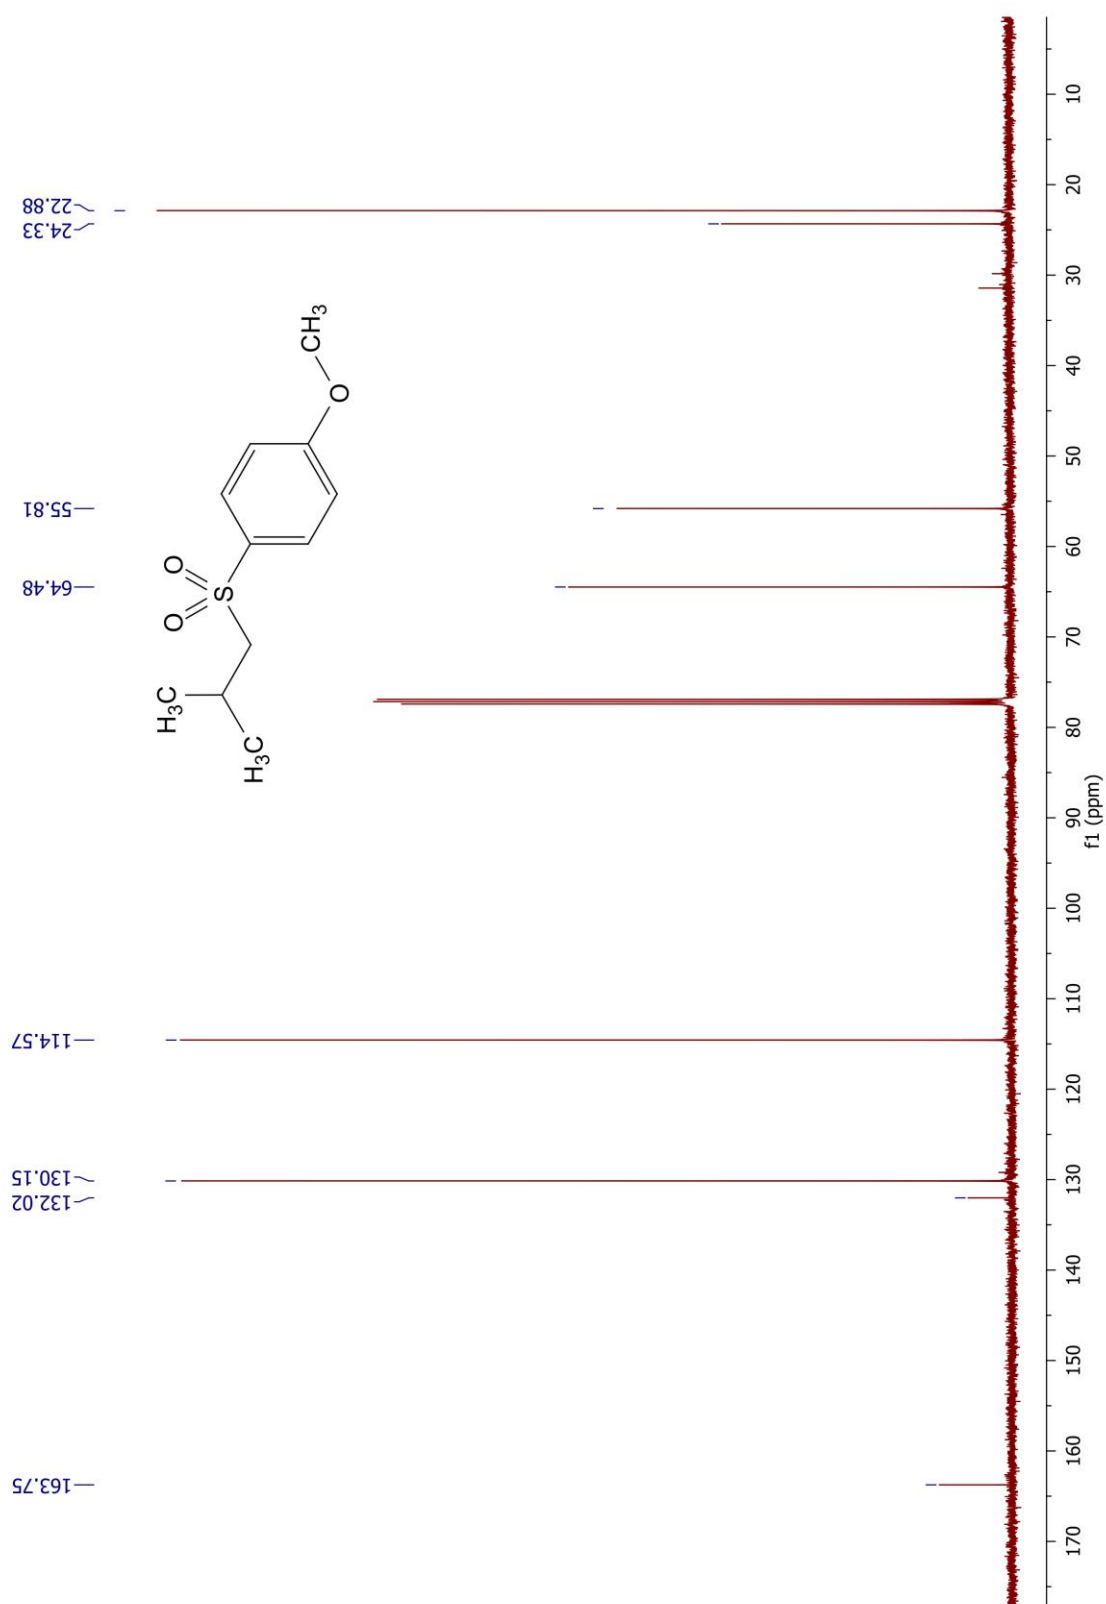

**Figure S21.**  $^{13}\text{C}$ -NMR of 1-(isobutylsulfonyl)-4-methoxybenzene (3k)

### Full mass spectrum

Spectrum from ISB-P\_(+)ESI.wiff2 (sample 1) - ISB-P\_(+)ESI, +TOF MS (50 - 1500) from 0.153 min, noise filtered (noise multiplier = 1.5), Gaussian smoothed (0.5 points)

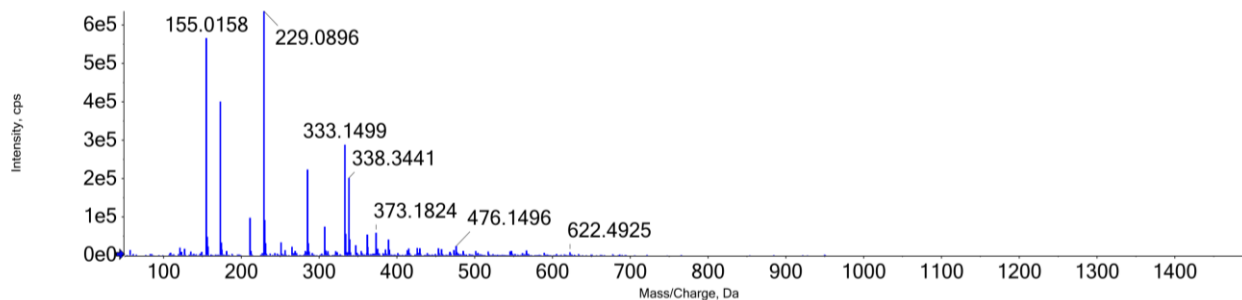

### Expanded spectrum

Spectrum from ISB-P\_(+)ESI.wiff2 (sample 1) - ISB-P\_(+)ESI, +TOF MS (50 - 1500) from 0.153 min, noise filtered (noise multiplier = 1.5), Gaussian smoothed (0.5 points)

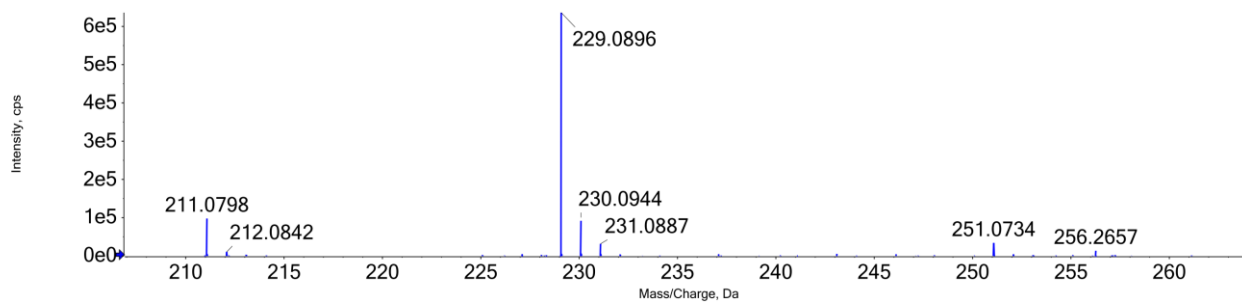

**Figure S22.** HRMS of 1-(isobutylsulfonyl)-4-methoxybenzene (**3k**)

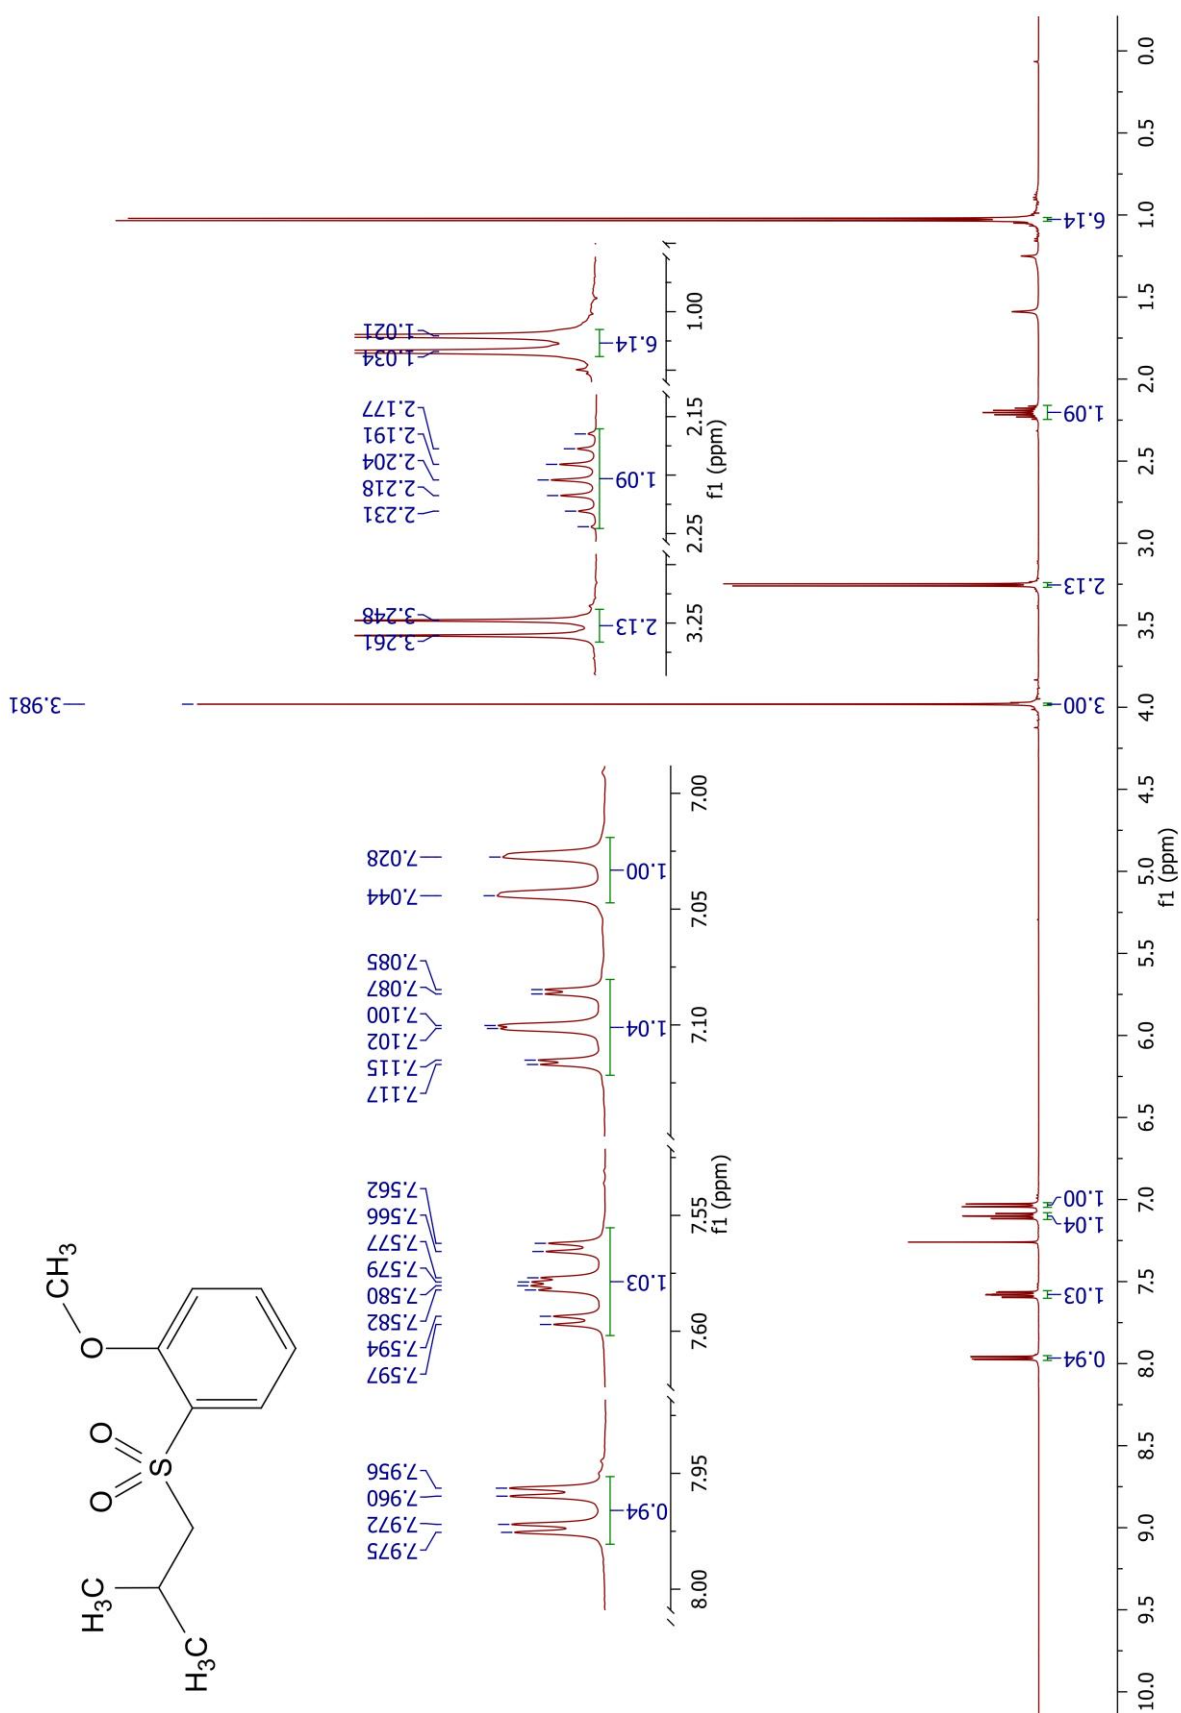

**Figure S23.** <sup>1</sup>H-NMR of 1-(isobutylsulfonyl)-2-methoxybenzene (**3k'**)

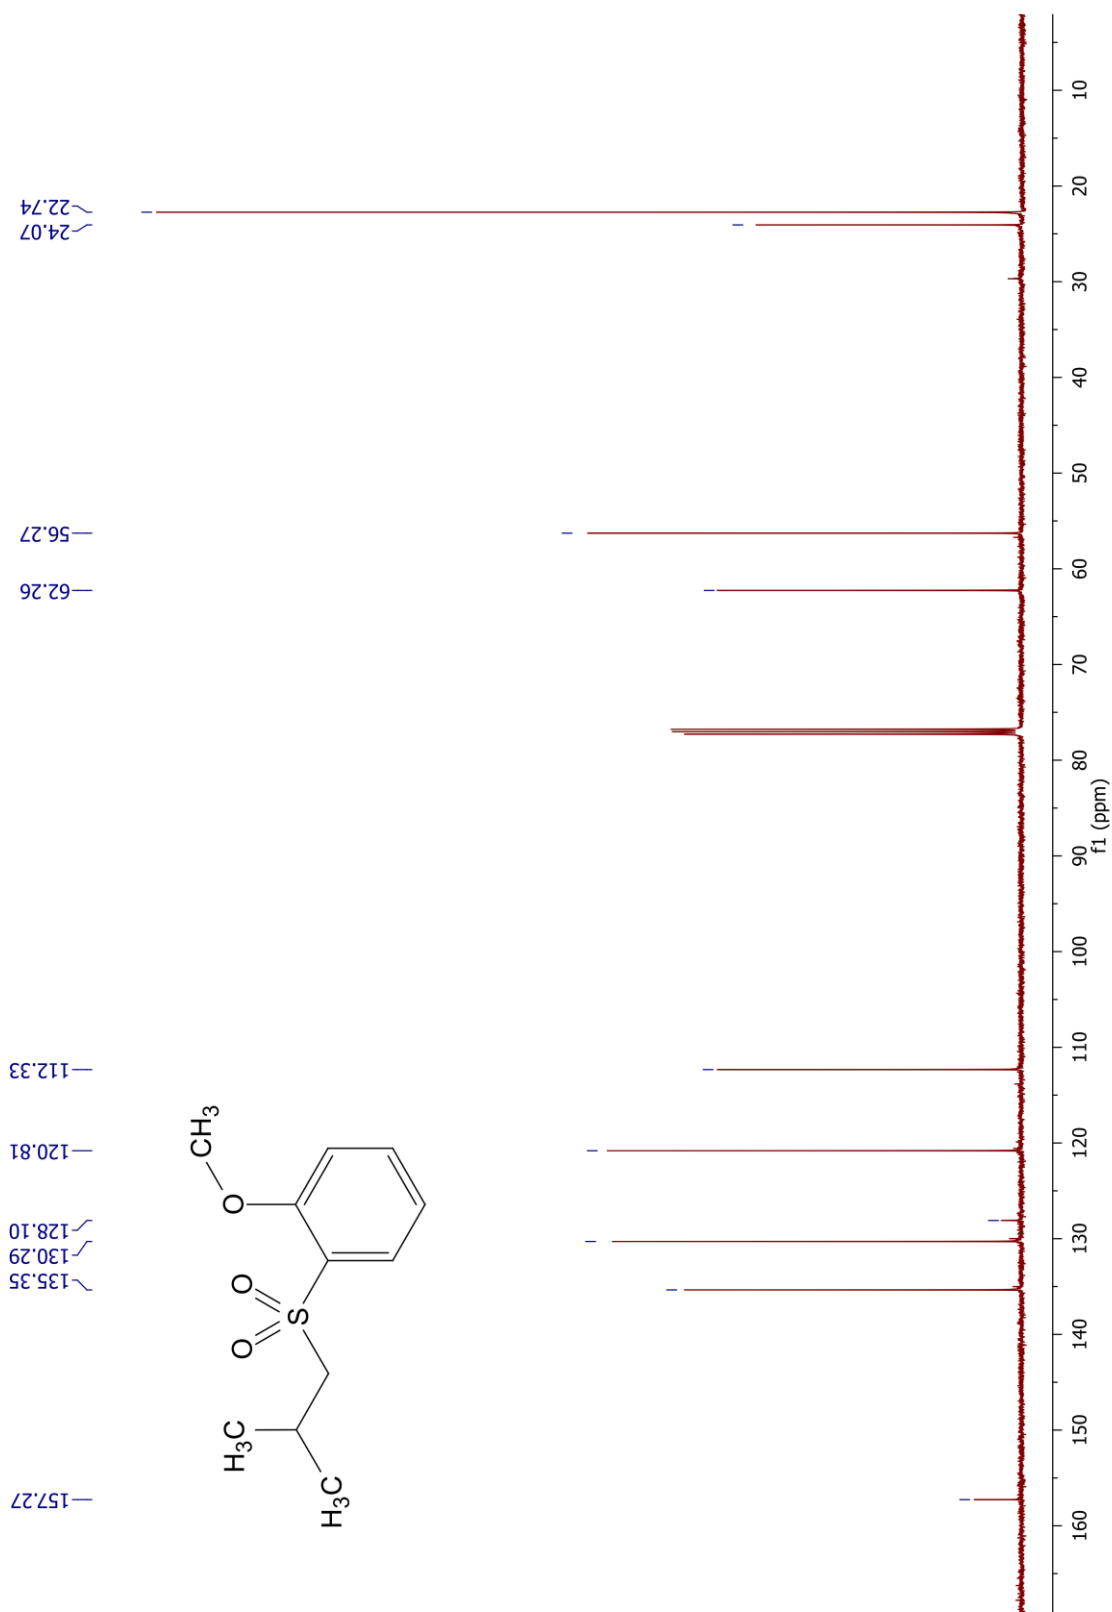

**Figure S24.**  $^{13}\text{C}$ -NMR of 1-(isobutylsulfonyl)-2-methoxybenzene (**3k'**)

### Full mass spectrum

Spectrum from ISB-O\_(+)ESI.wiff2 (sample 1) - ISB-O\_(+)ESI, +TOF MS (50 - 1500) from 0.143 min, noise filtered (noise multiplier = 1.5), Gaussian smoothed (0.5 points)

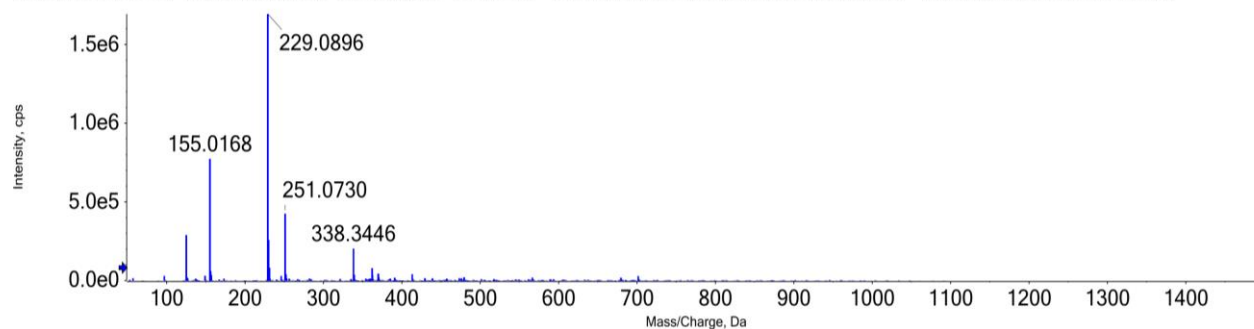

### Expanded spectrum

Spectrum from ISB-O\_(+)ESI.wiff2 (sample 1) - ISB-O\_(+)ESI, +TOF MS (50 - 1500) from 0.143 min, noise filtered (noise multiplier = 1.5), Gaussian smoothed (0.5 points)

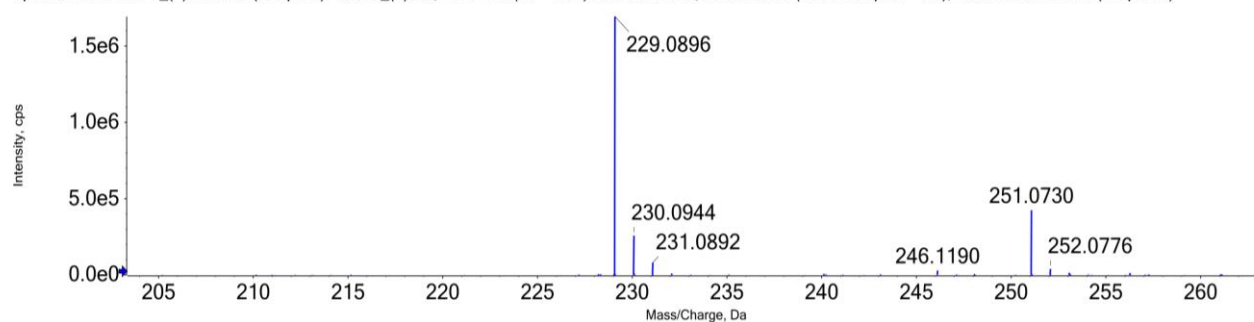

**Figure S25.** HRMS of 1-(isobutylsulfonyl)-2-methoxybenzene (**3k'**)

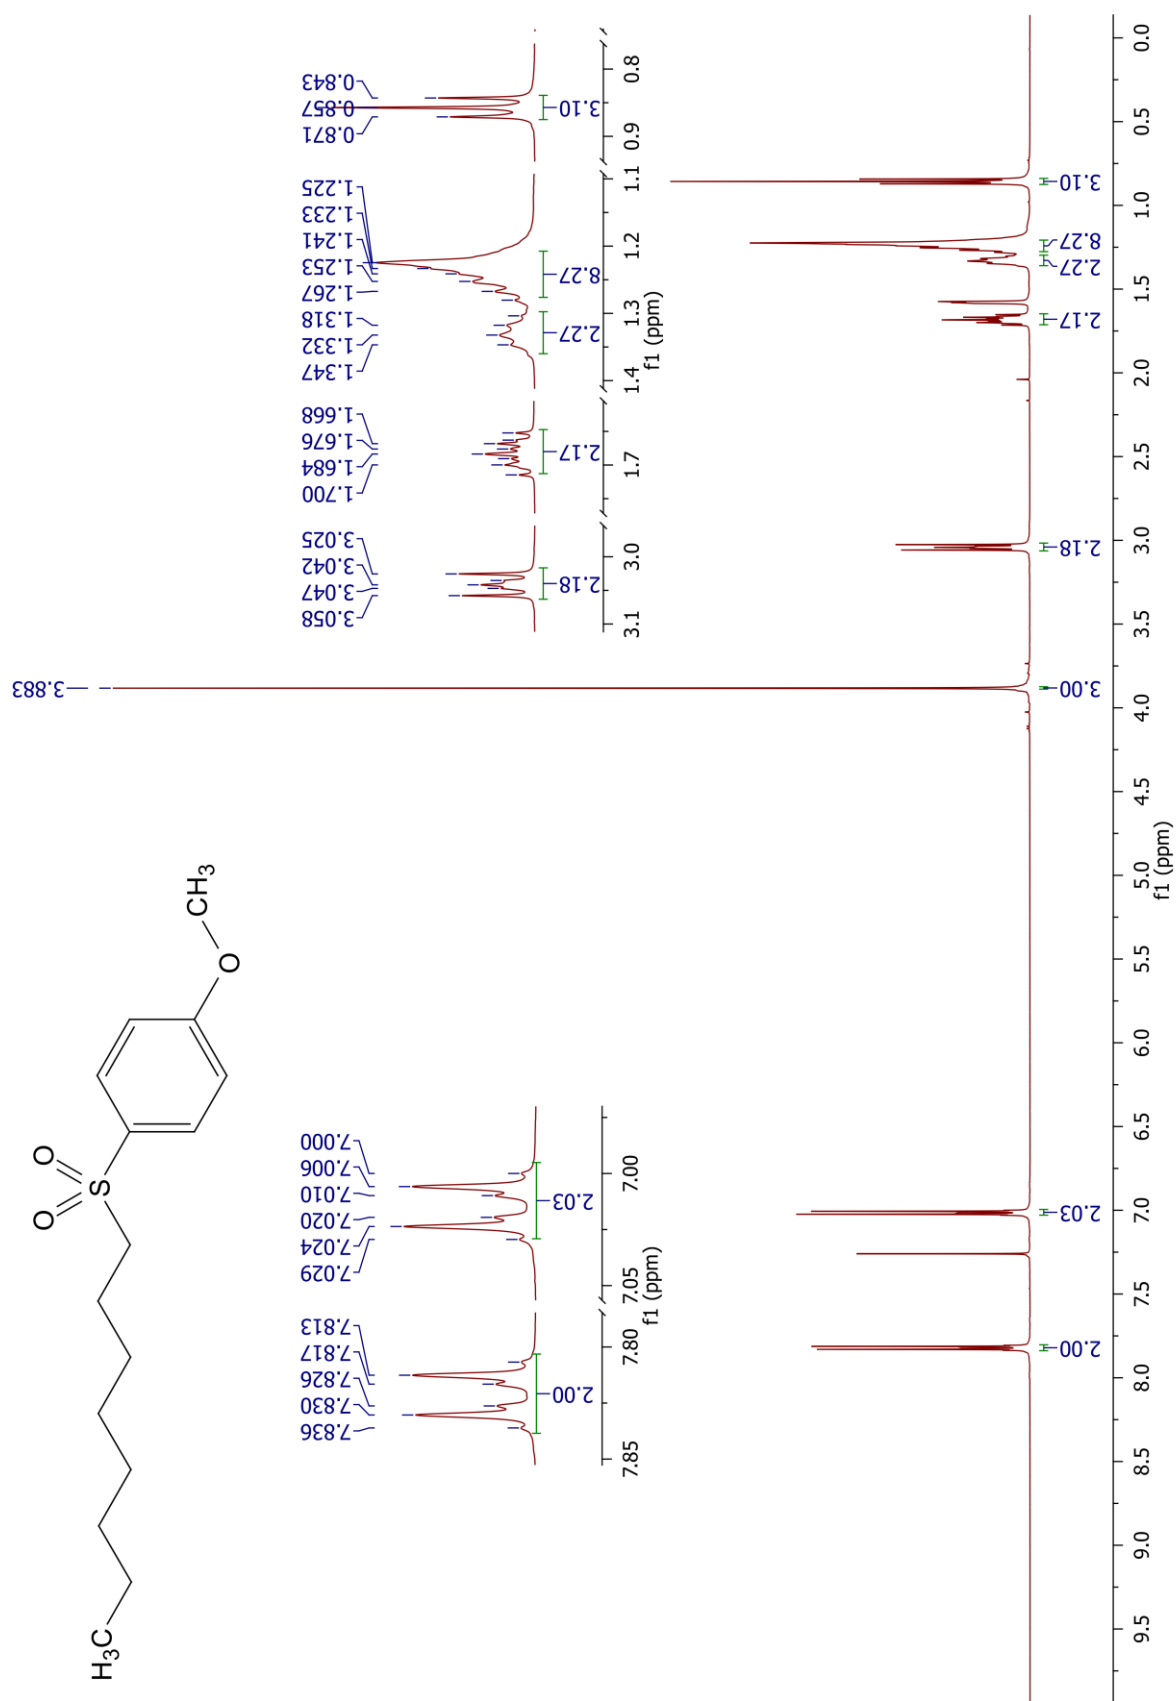

**Figure S26.** <sup>1</sup>H-NMR of 1-methoxy-4-(octylsulfonyl)benzene (3I)



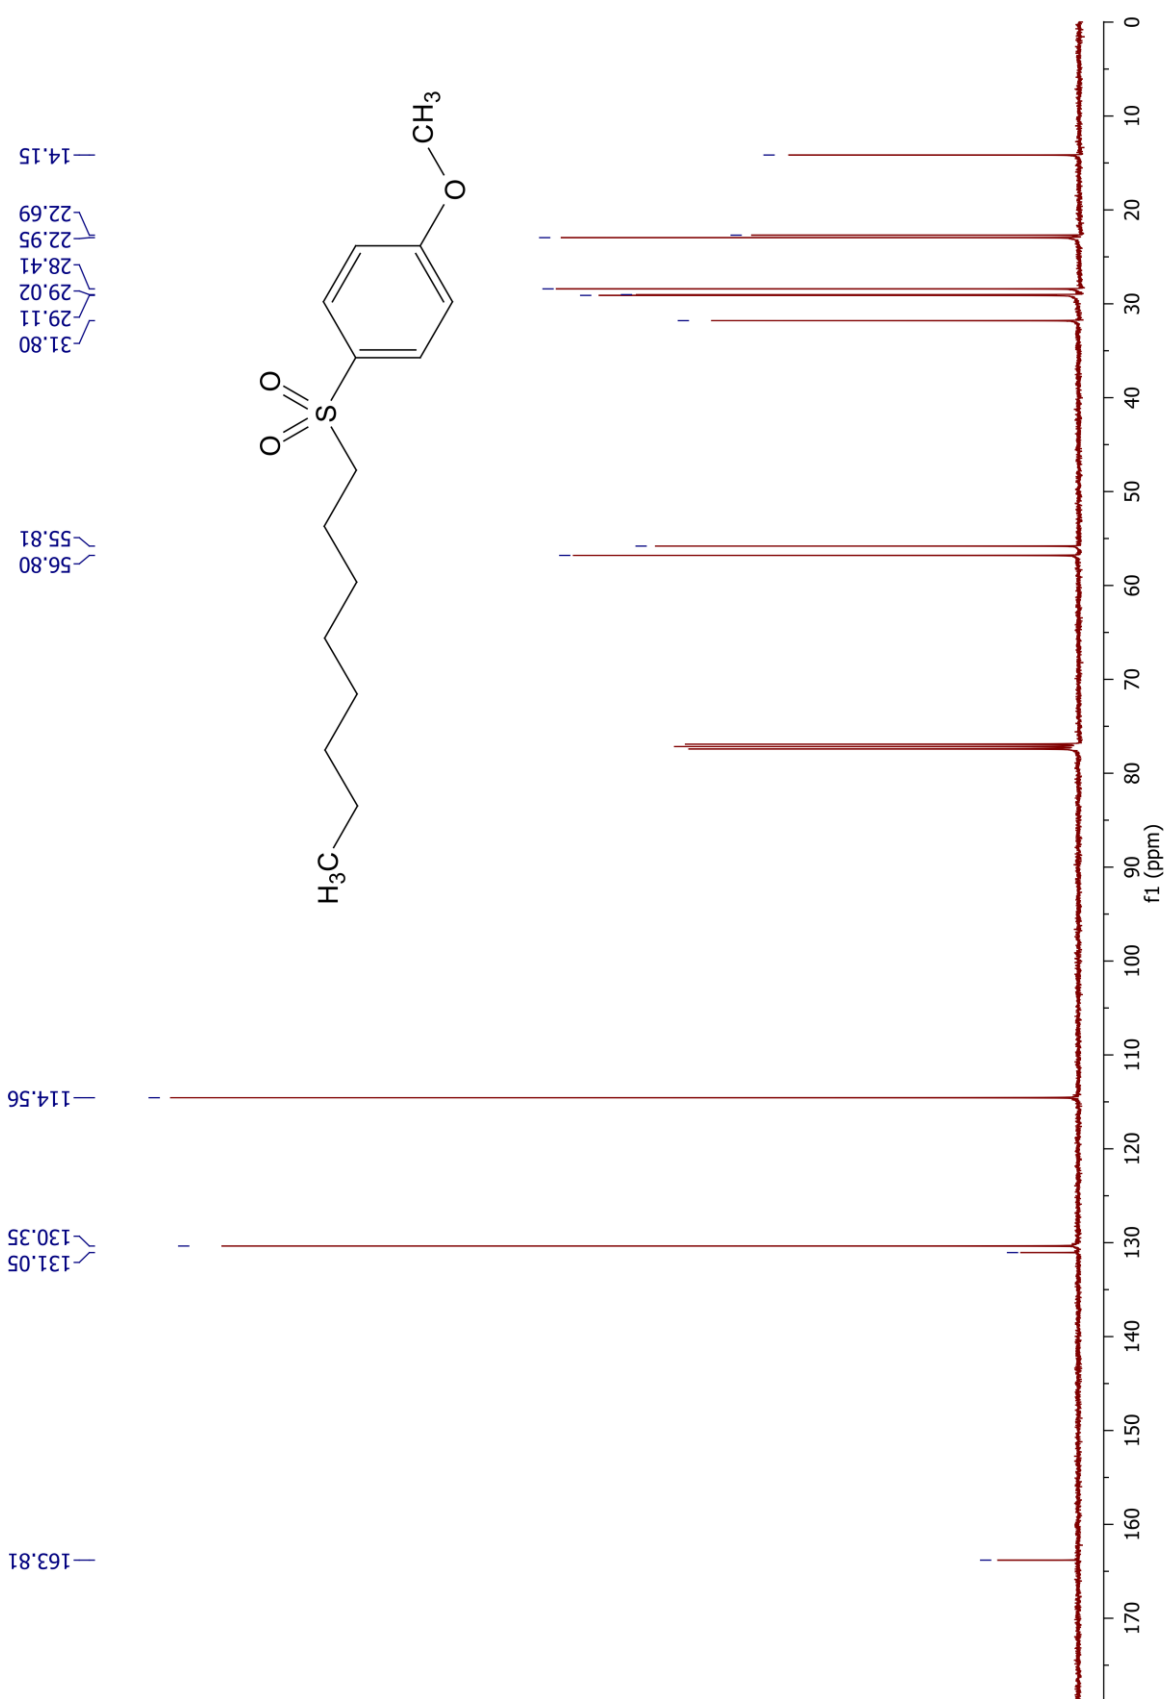

**Figure S27.** <sup>13</sup>C-NMR of 1-methoxy-4-(octylsulfonyl)benzene (3I)

### Full mass spectrum

Spectrum from OCTAN-P\_(+)ESI.wiff2 (sample 1) - OCTAN-P\_(+)ESI, +TOF MS (50 - 1500) from 0.153 min, noise filtered (noise multiplier = 1.5), Gaussian smoothed (0.5 points)

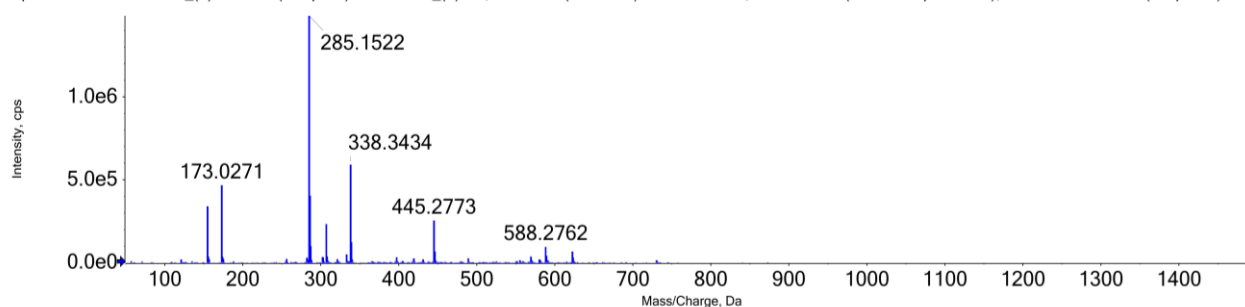

### Expanded spectrum

Spectrum from OCTAN-P\_(+)ESI.wiff2 (sample 1) - OCTAN-P\_(+)ESI, +TOF MS (50 - 1500) from 0.153 min, noise filtered (noise multiplier = 1.5), Gaussian smoothed (0.5 points)

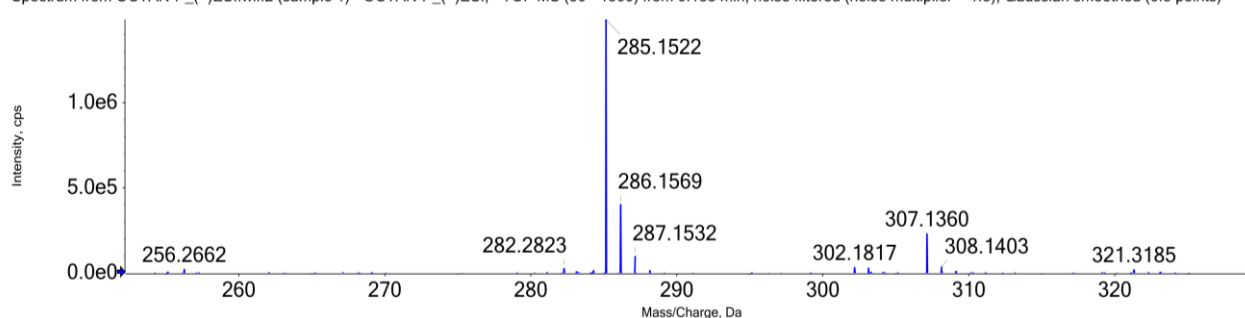

**Figure S28.** HRMS of 1-methoxy-4-(octylsulfonyl)benzene (**3I**)

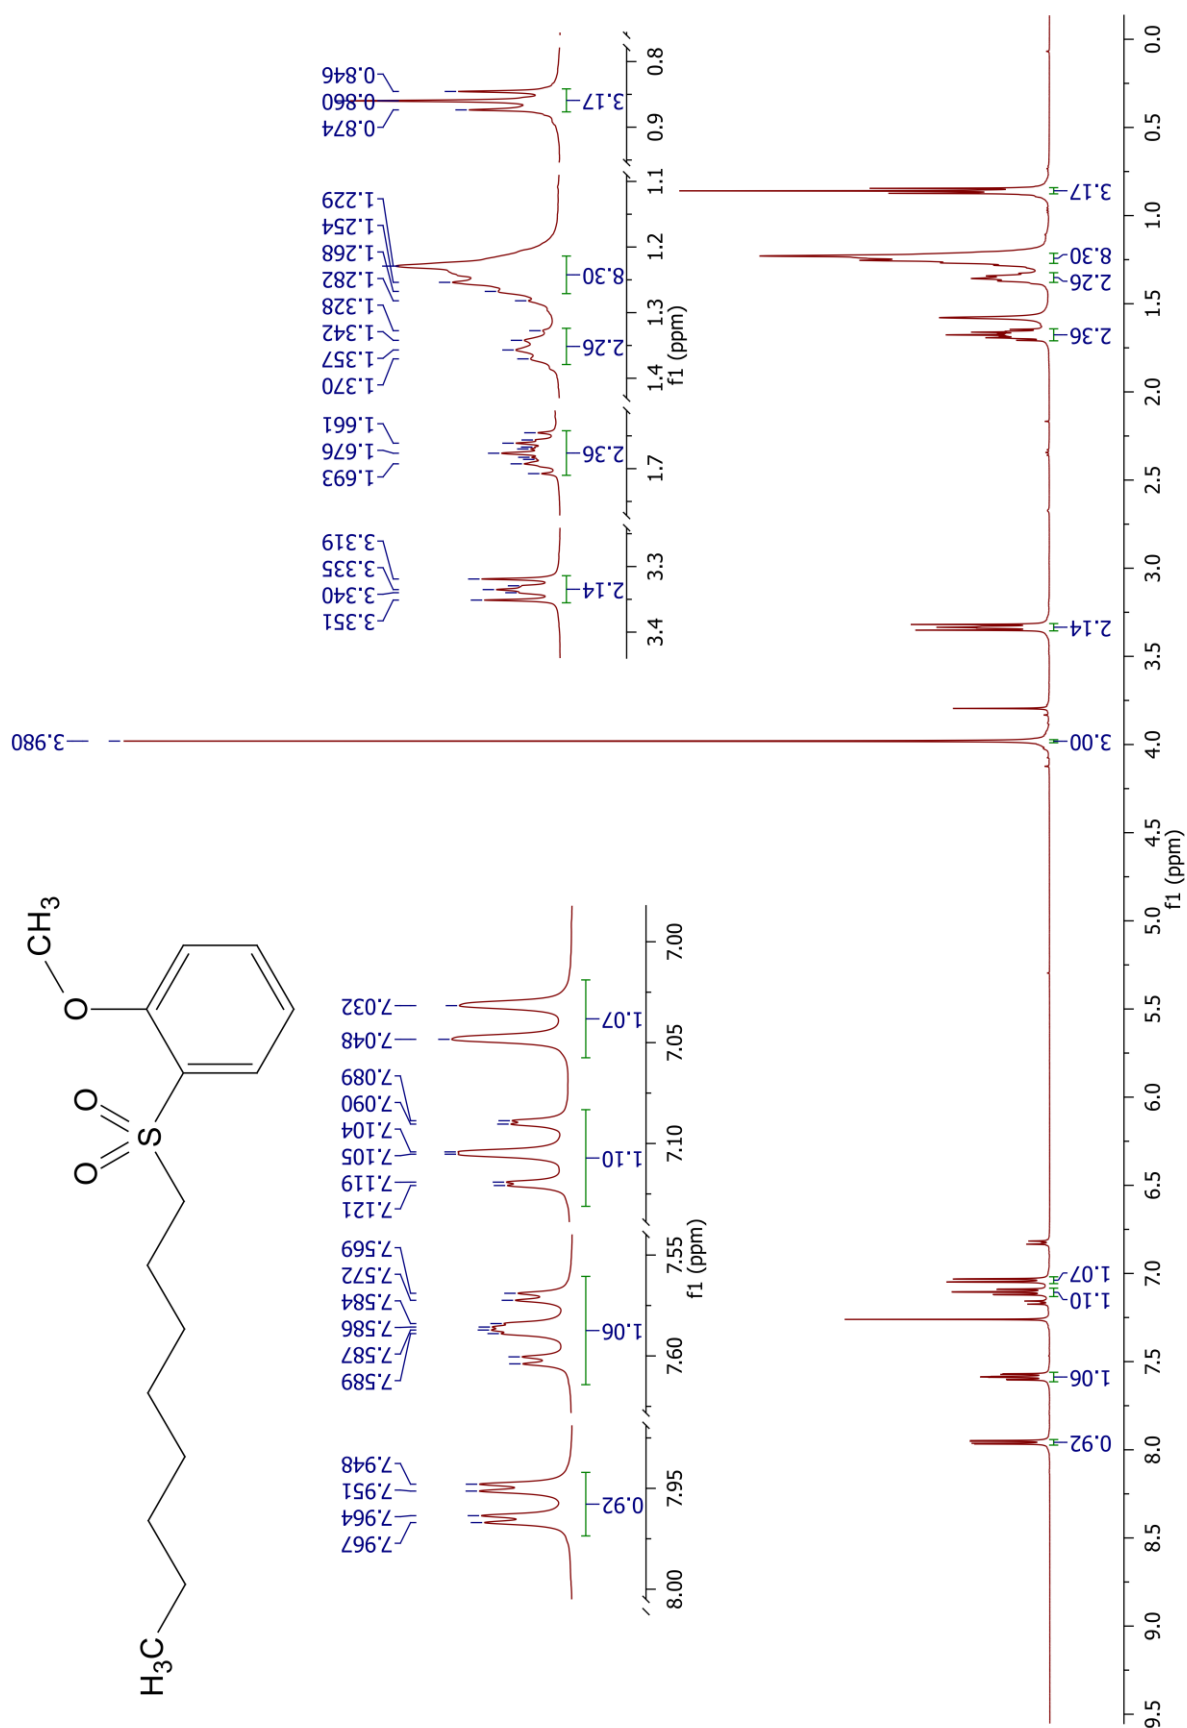

**Figure S29.** <sup>1</sup>H-NMR of 1-methoxy-2-(octylsulfonyl)benzene (31l')

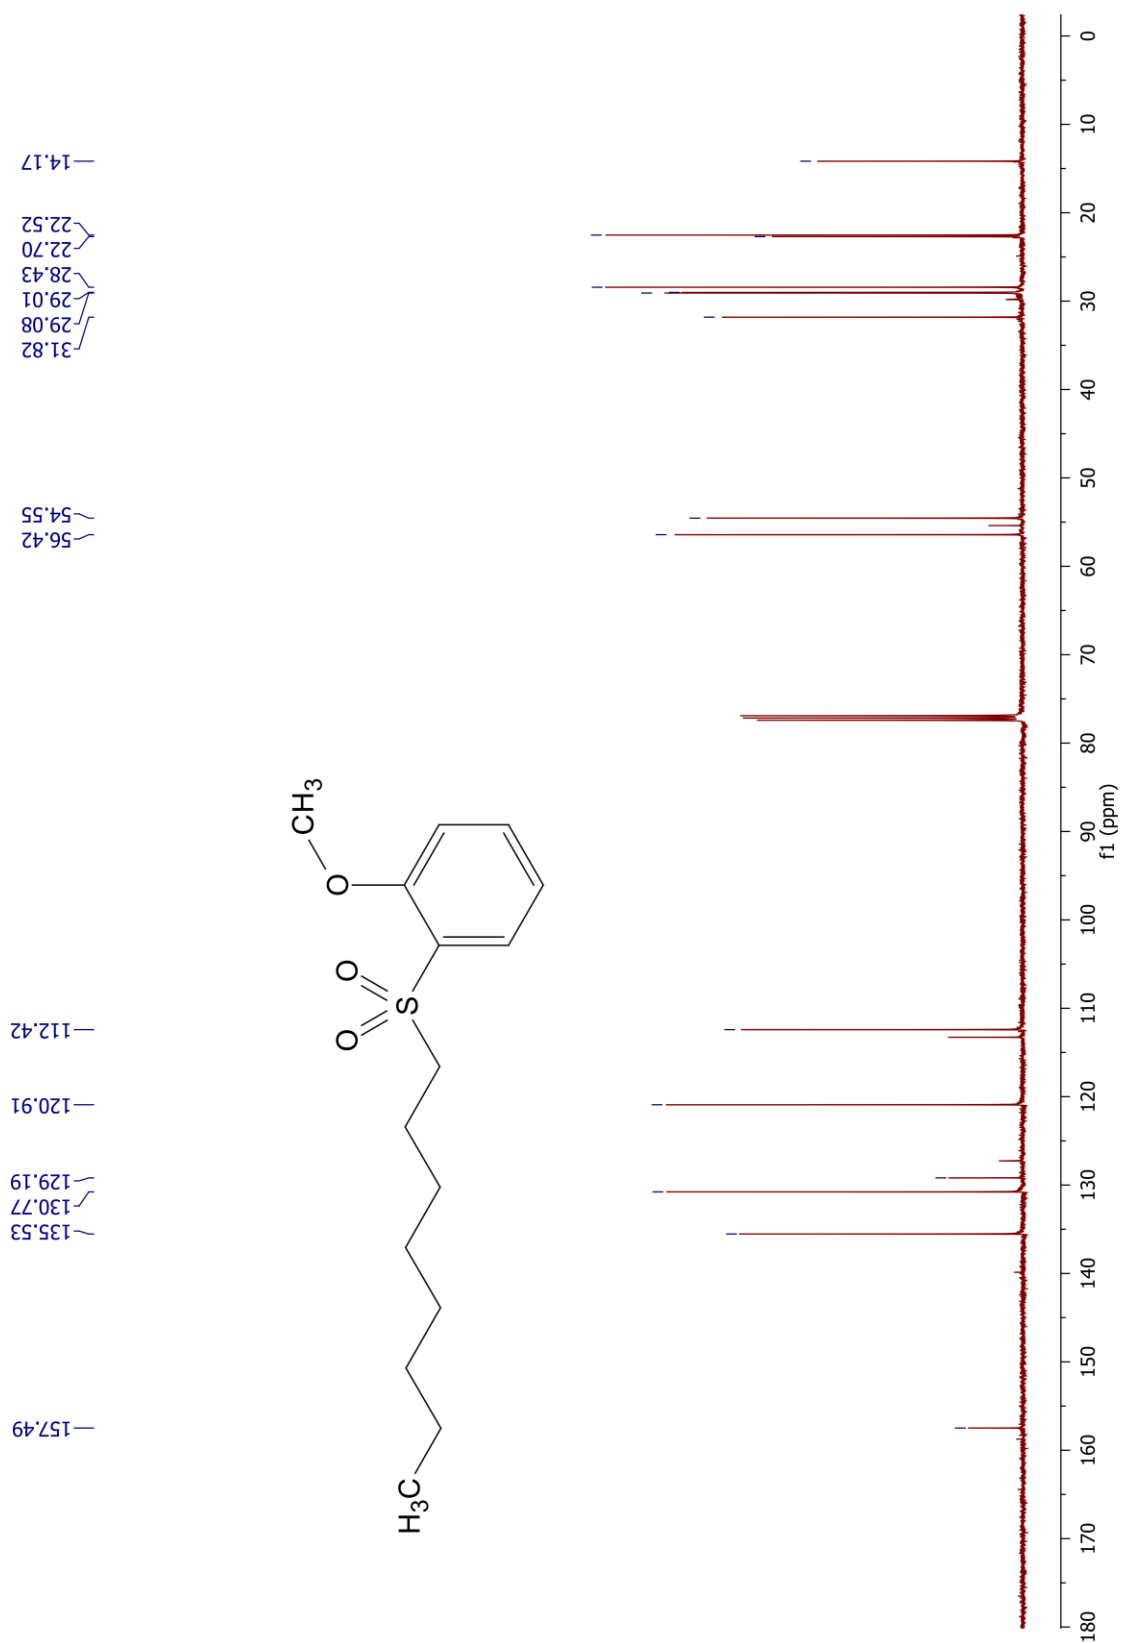

**Figure S30.**  $^{13}\text{C}$ -NMR of 1-methoxy-2-(octylsulfonyl)benzene (31')

### Full mass spectrum

Spectrum from OCTAN-O<sub>2</sub>(+)ESI.wiff2 (sample 1) - OCTAN-O<sub>2</sub>(+)ESI, +TOF MS (50 - 1500) from 0.143 min, noise filtered (noise multiplier = 1.5), Gaussian smoothed (0.5 points)

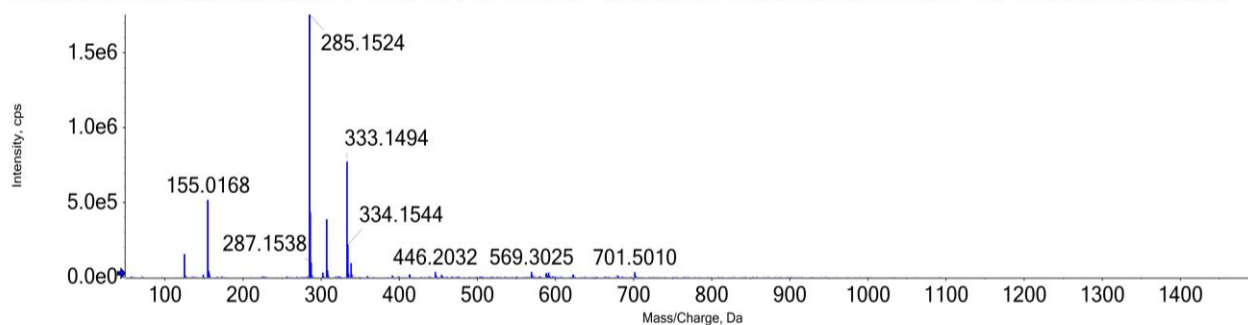

### Expanded spectrum

Spectrum from OCTAN-O<sub>2</sub>(+)ESI.wiff2 (sample 1) - OCTAN-O<sub>2</sub>(+)ESI, +TOF MS (50 - 1500) from 0.143 min, noise filtered (noise multiplier = 1.5), Gaussian smoothed (0.5 points)

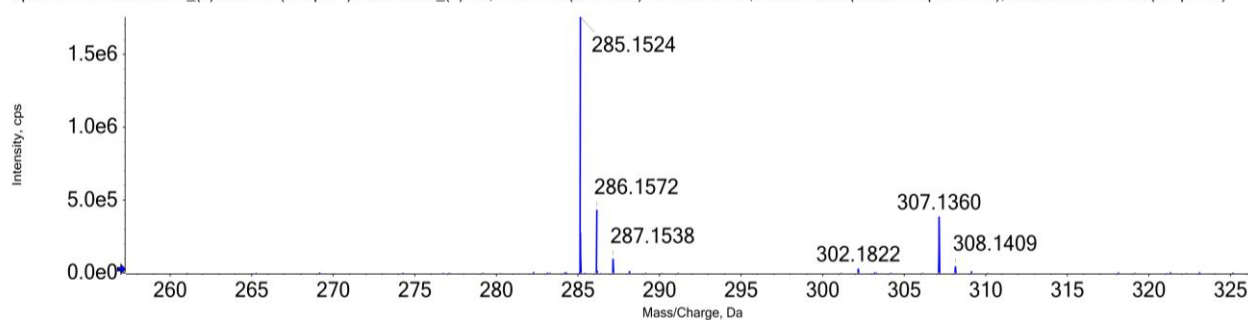

**Figure S31.** HRMS of 1-methoxy-2-(octylsulfonyl)benzene (**3I'**)

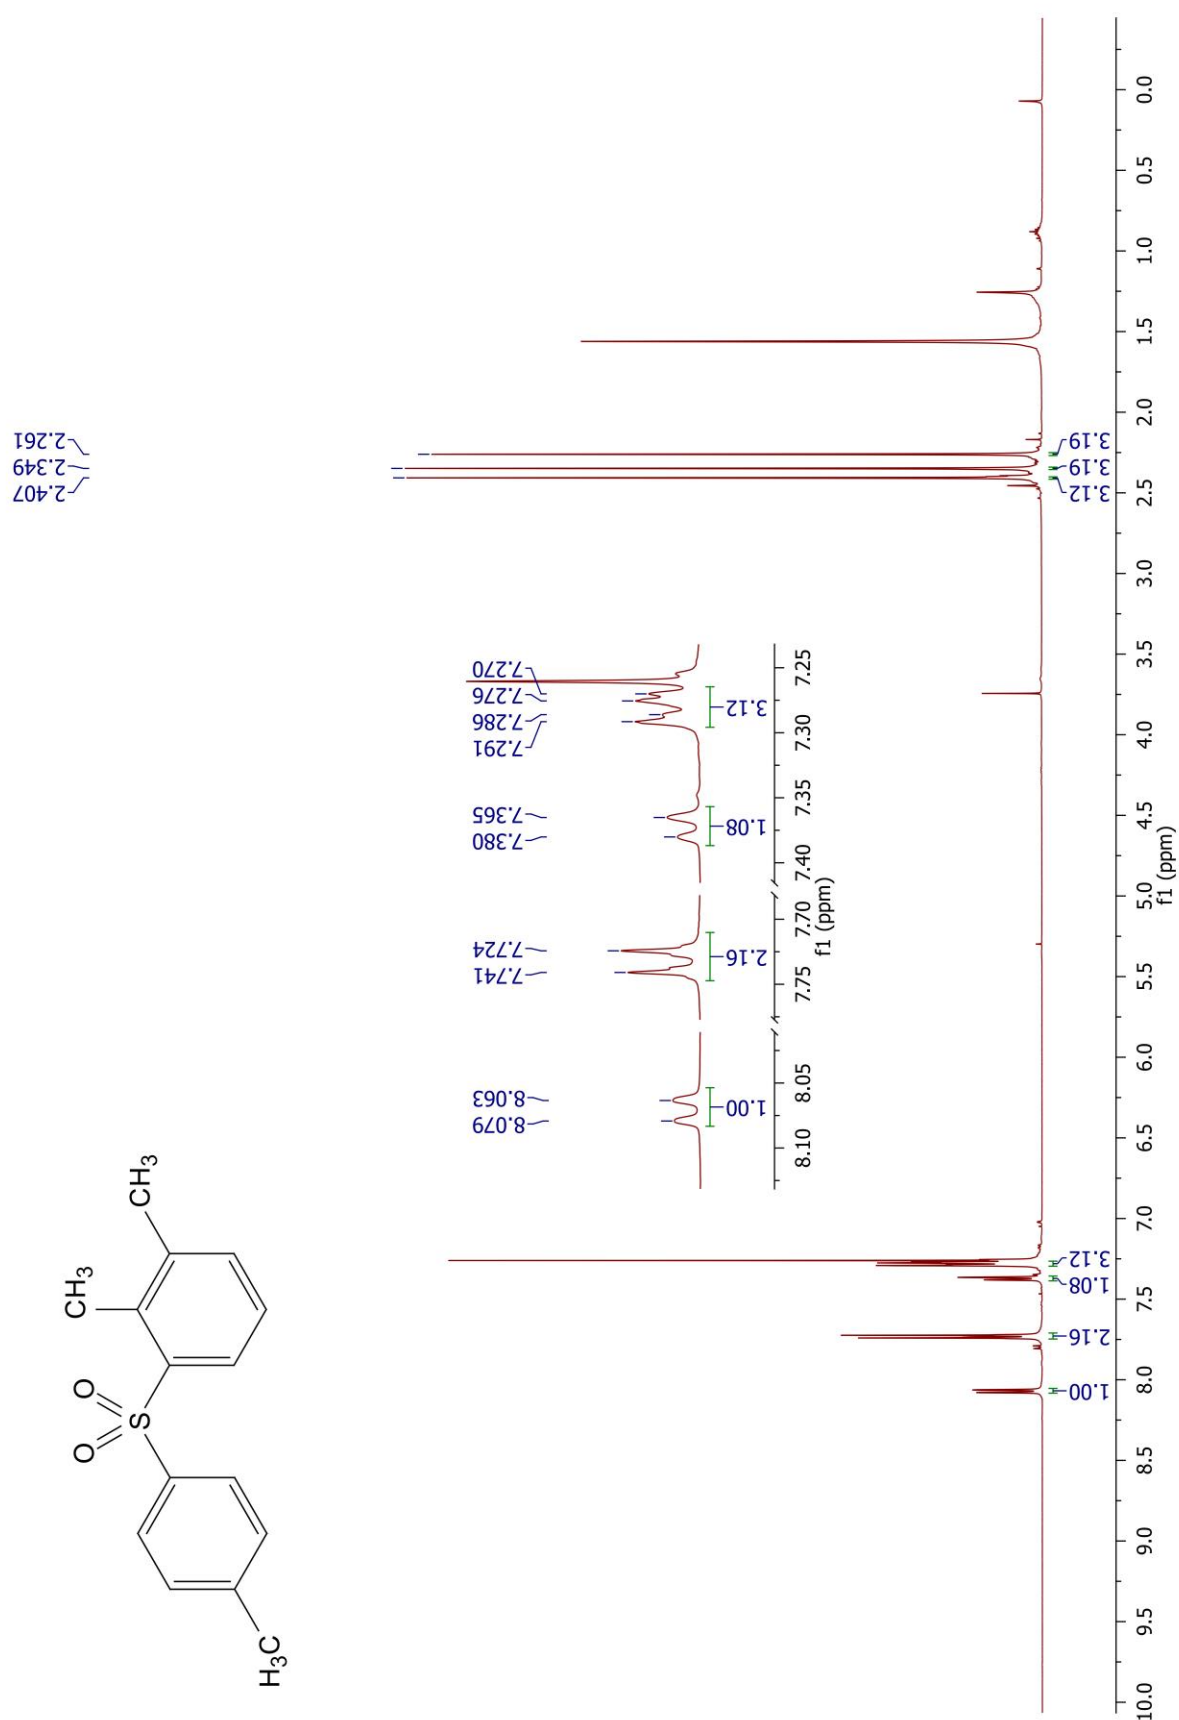

**Figure S32:** <sup>1</sup>H-NMR of 2,3-dimethyl-1-tosylbenzene (**30'**)

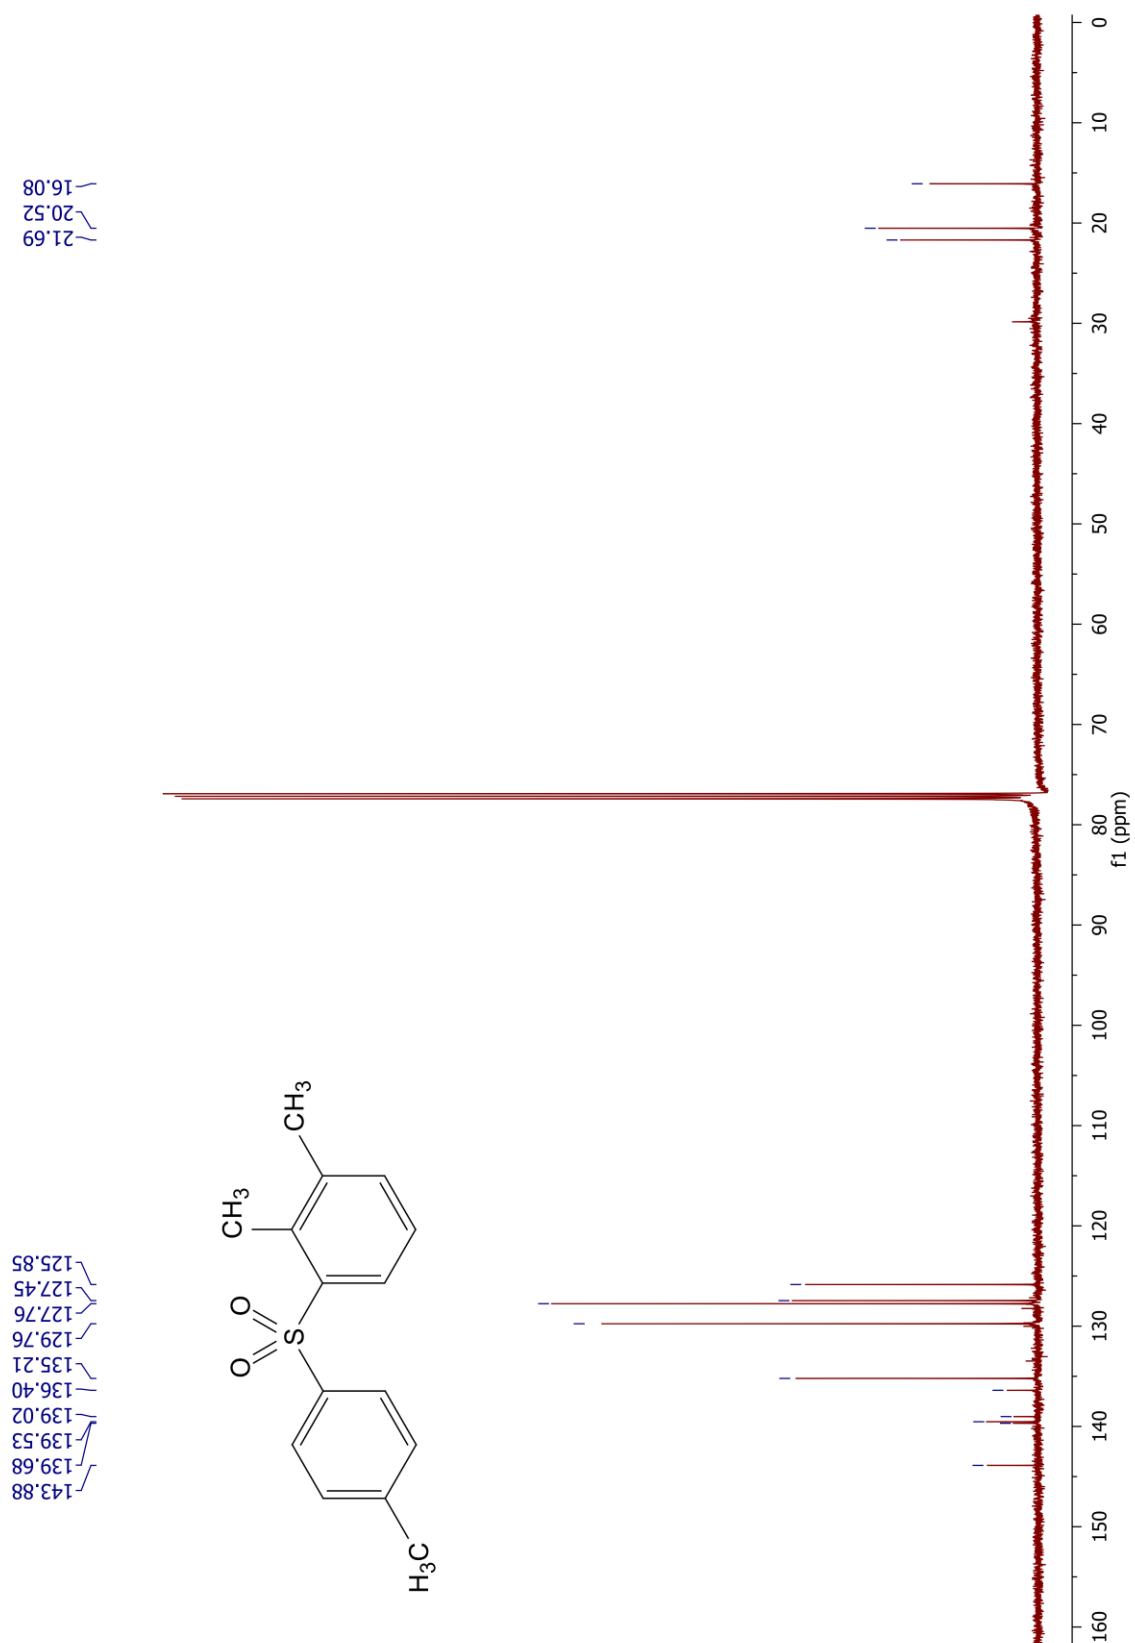

**Figure S33:** <sup>13</sup>C-NMR of 2,3-dimethyl-1-tosylbenzene (**3o'**)

### Full mass spectrum

Spectrum from TOX-T\_(+)ESI.wiff2 (sample 1) - TOX-T\_(+)ESI, +TOF MS (50 - 1500) from 0.167 min, noise filtered (noise multiplier = 1.5), Gaussian smoothed (0.5 points)

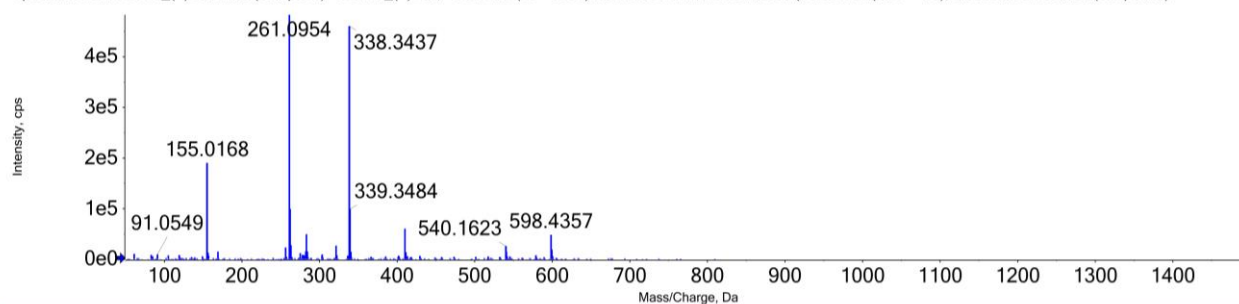

### Expanded spectrum

Spectrum from TOX-T\_(+)ESI.wiff2 (sample 1) - TOX-T\_(+)ESI, +TOF MS (50 - 1500) from 0.167 min, noise filtered (noise multiplier = 1.5), Gaussian smoothed (0.5 points)

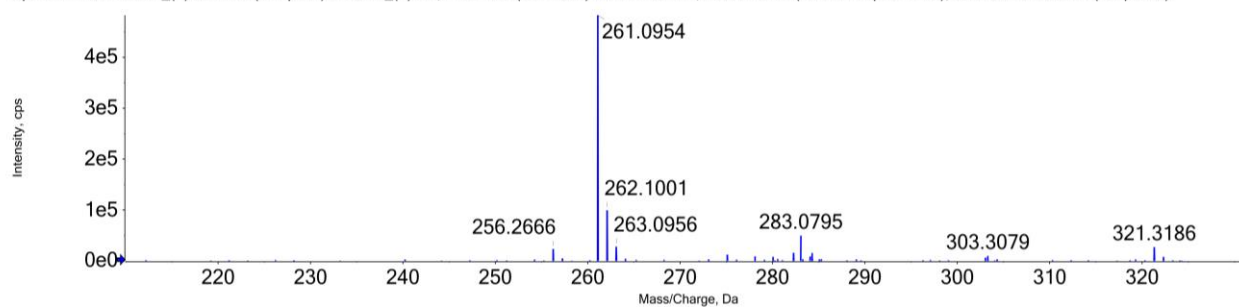

**Figure S34:** HRMS of 2,3-dimethyl-1-tosylbenzene (**3o'**)



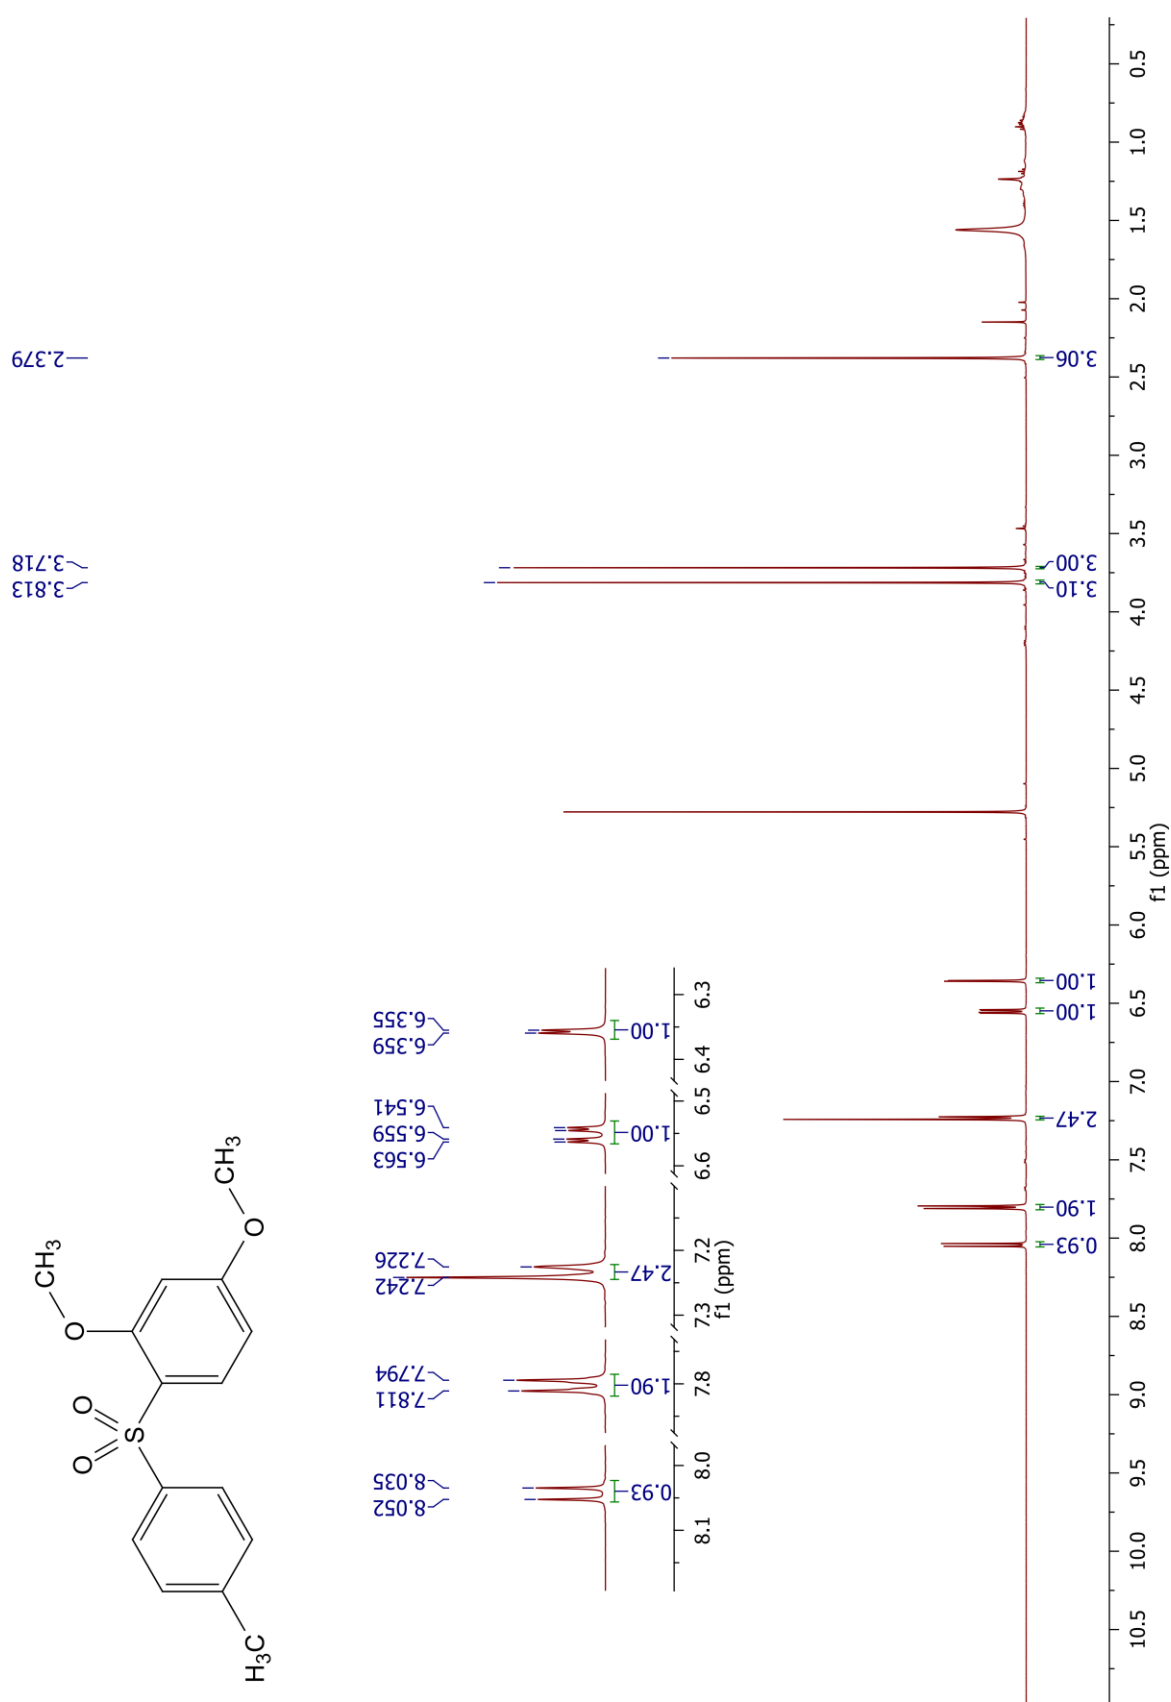

**Figure S35.** <sup>1</sup>H-NMR of 2,4-dimethoxy-1-tosylbenzene (**3p**)

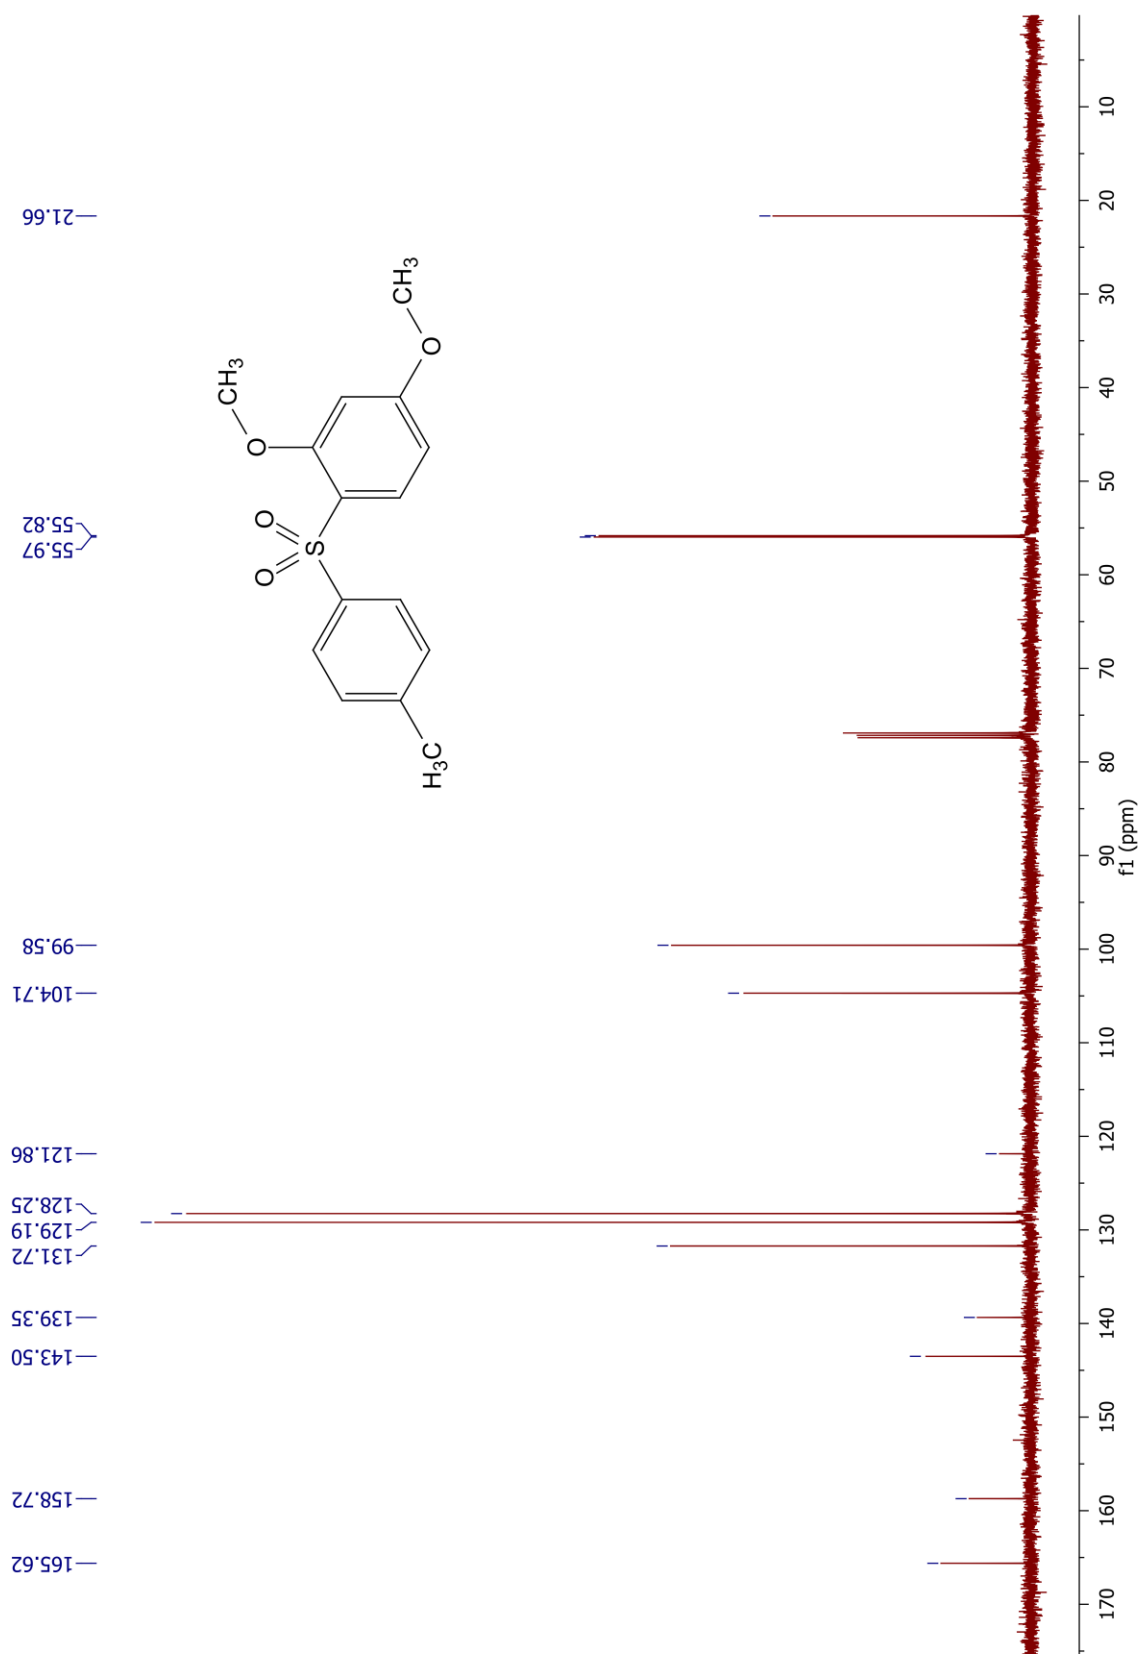

**Figure S36.**  $^{13}\text{C}$ -NMR of 2,4-dimethoxy-1-tosylbenzene (3p)

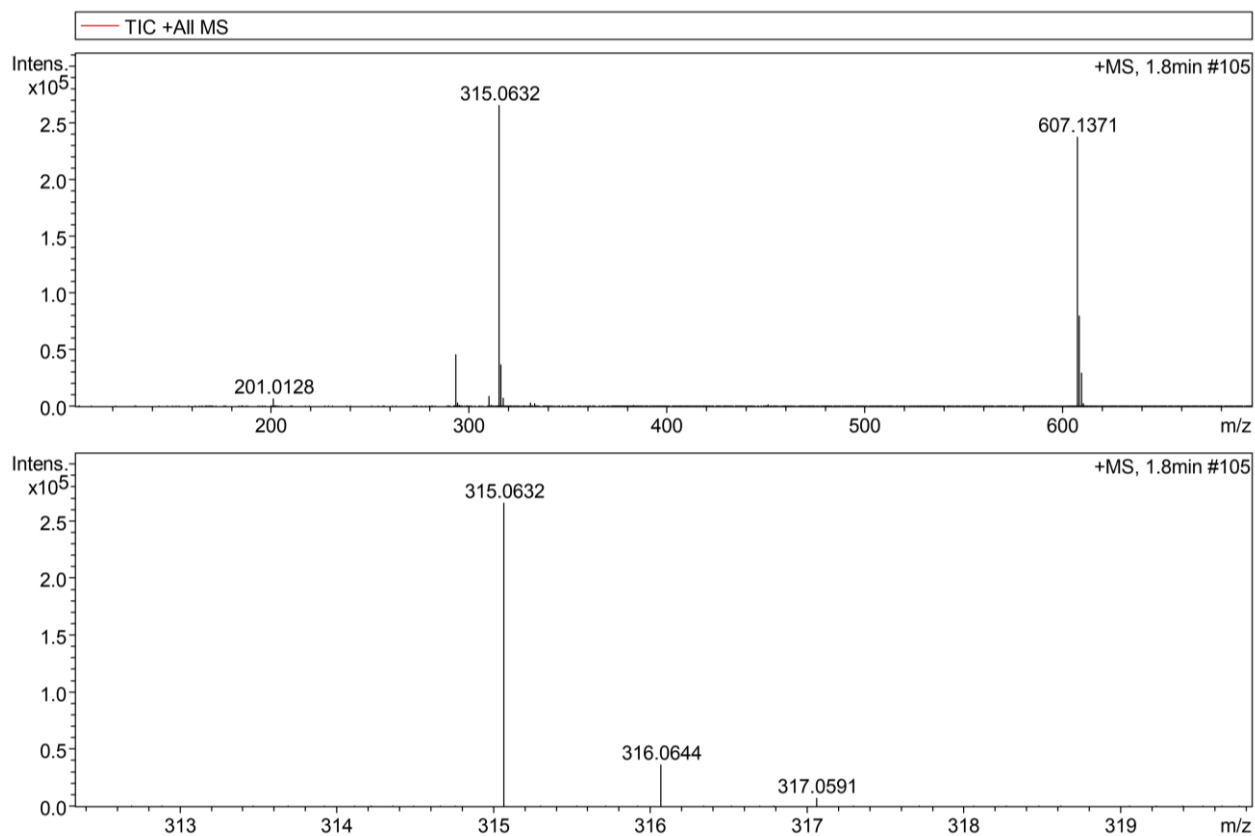

**Figure S37.** HRMS of 2,4-dimethoxy-1-tosylbenzene (**3p**)

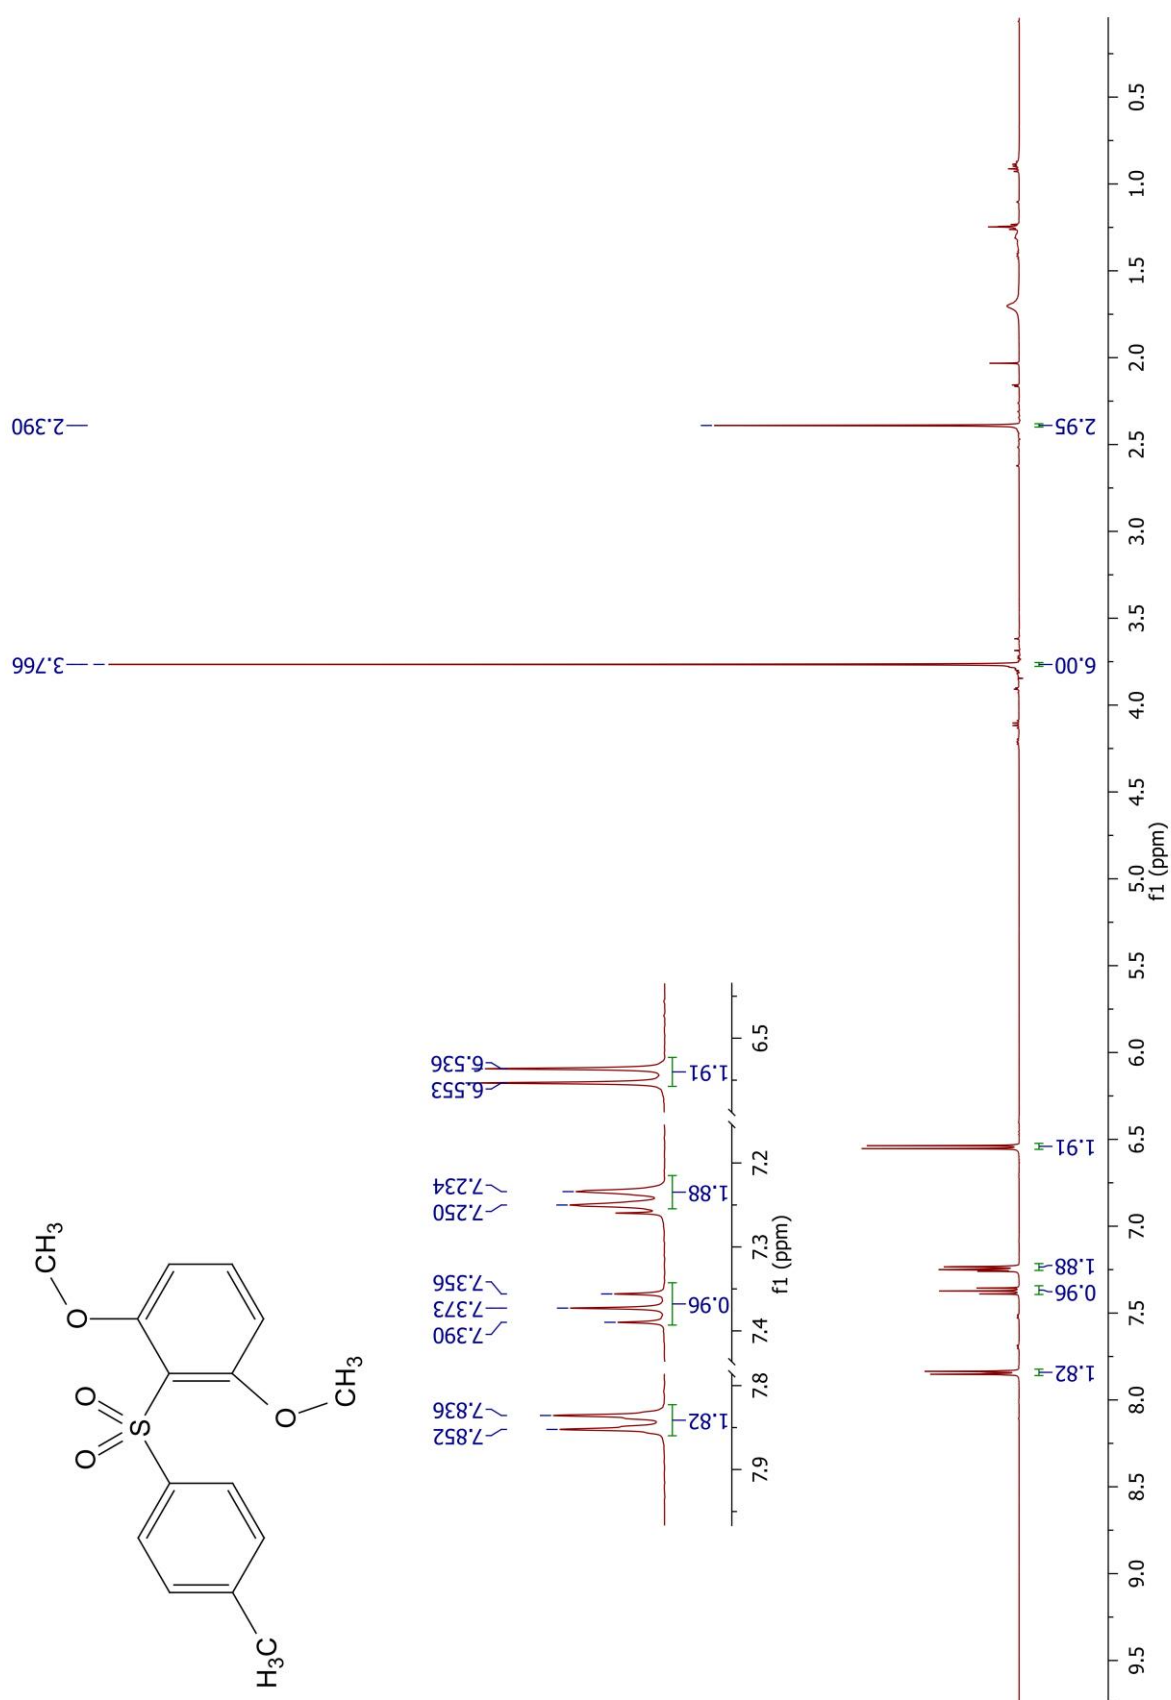

**Figure S38.** <sup>1</sup>H-NMR of 1,3-dimethoxy-2-tosylbenzene (3p')

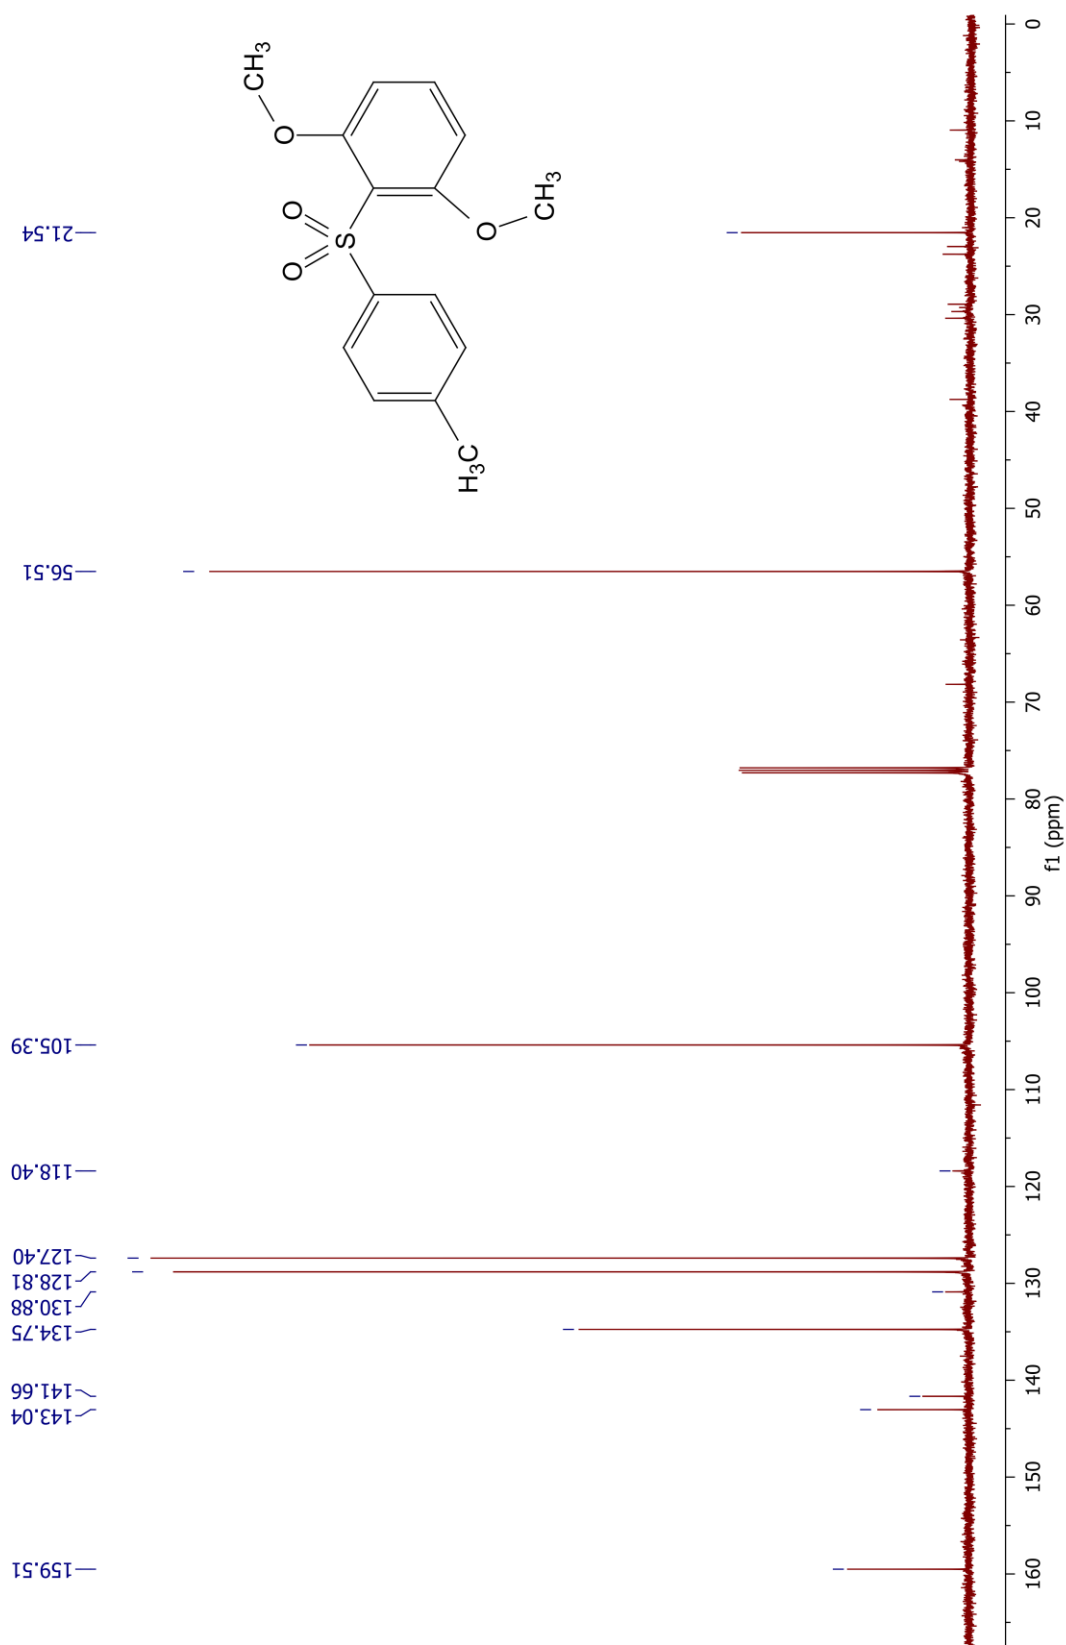

**Figure S39.**  $^{13}\text{C}$ -NMR of 1,3-dimethoxy-2-tosylbenzene (3p')

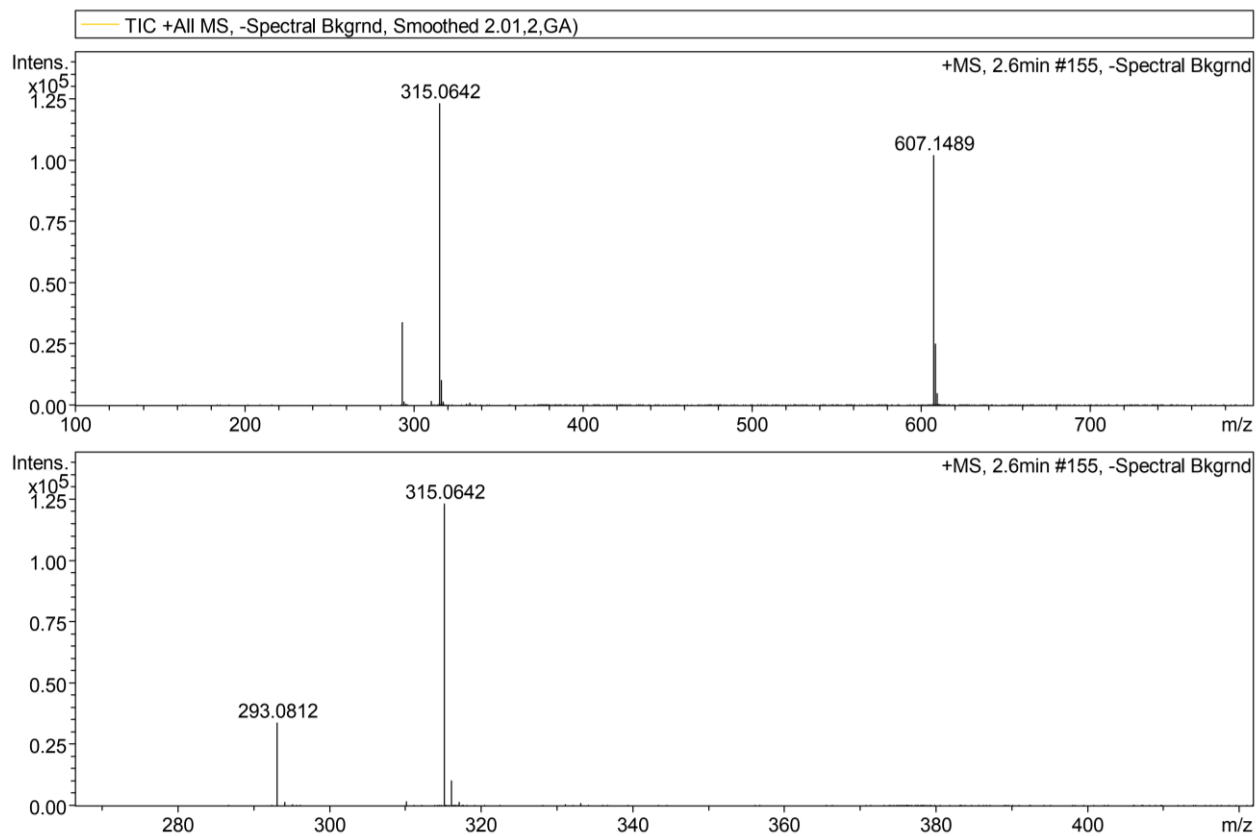

**Figure S40.** HRMS of 1,3-dimethoxy-2-tosylbenzene (**3p'**)

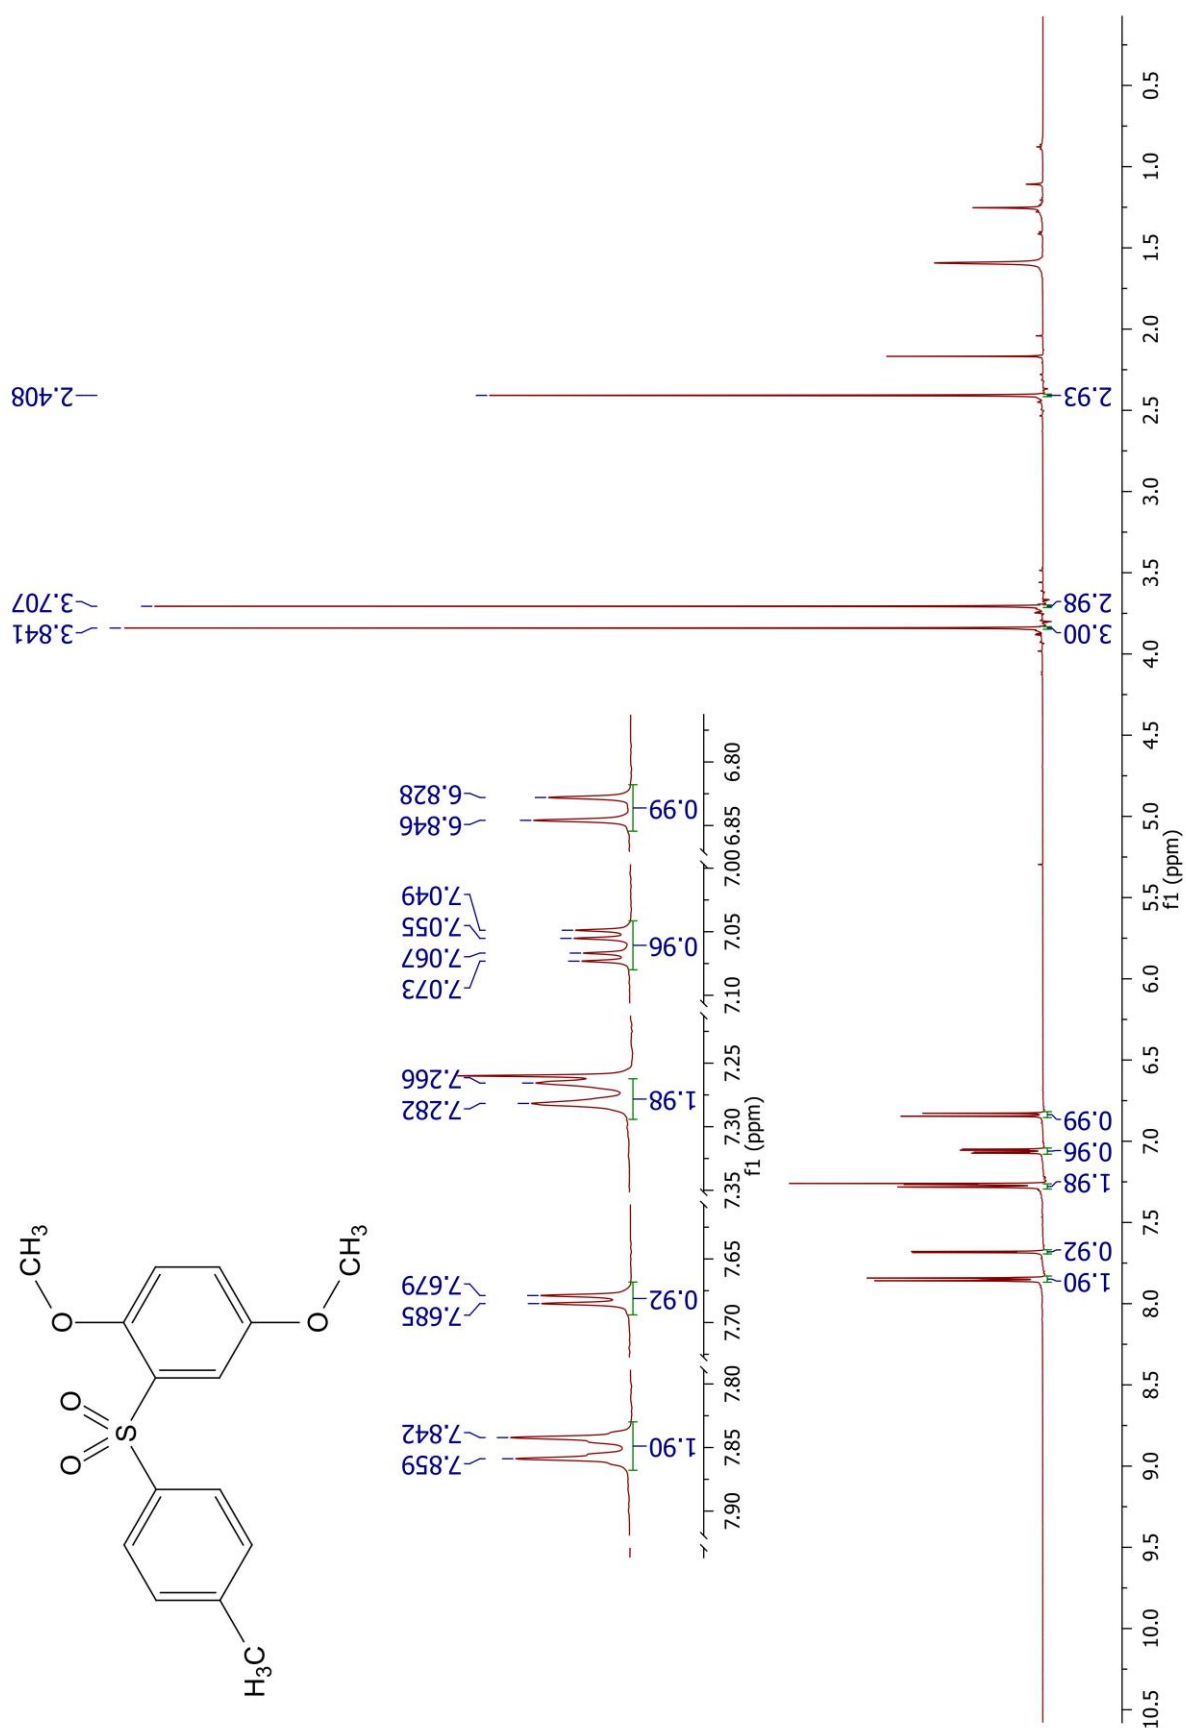

**Figure S41.** <sup>1</sup>H-NMR of 1,4-dimethoxy-2-tosylbenzene (**3q**)

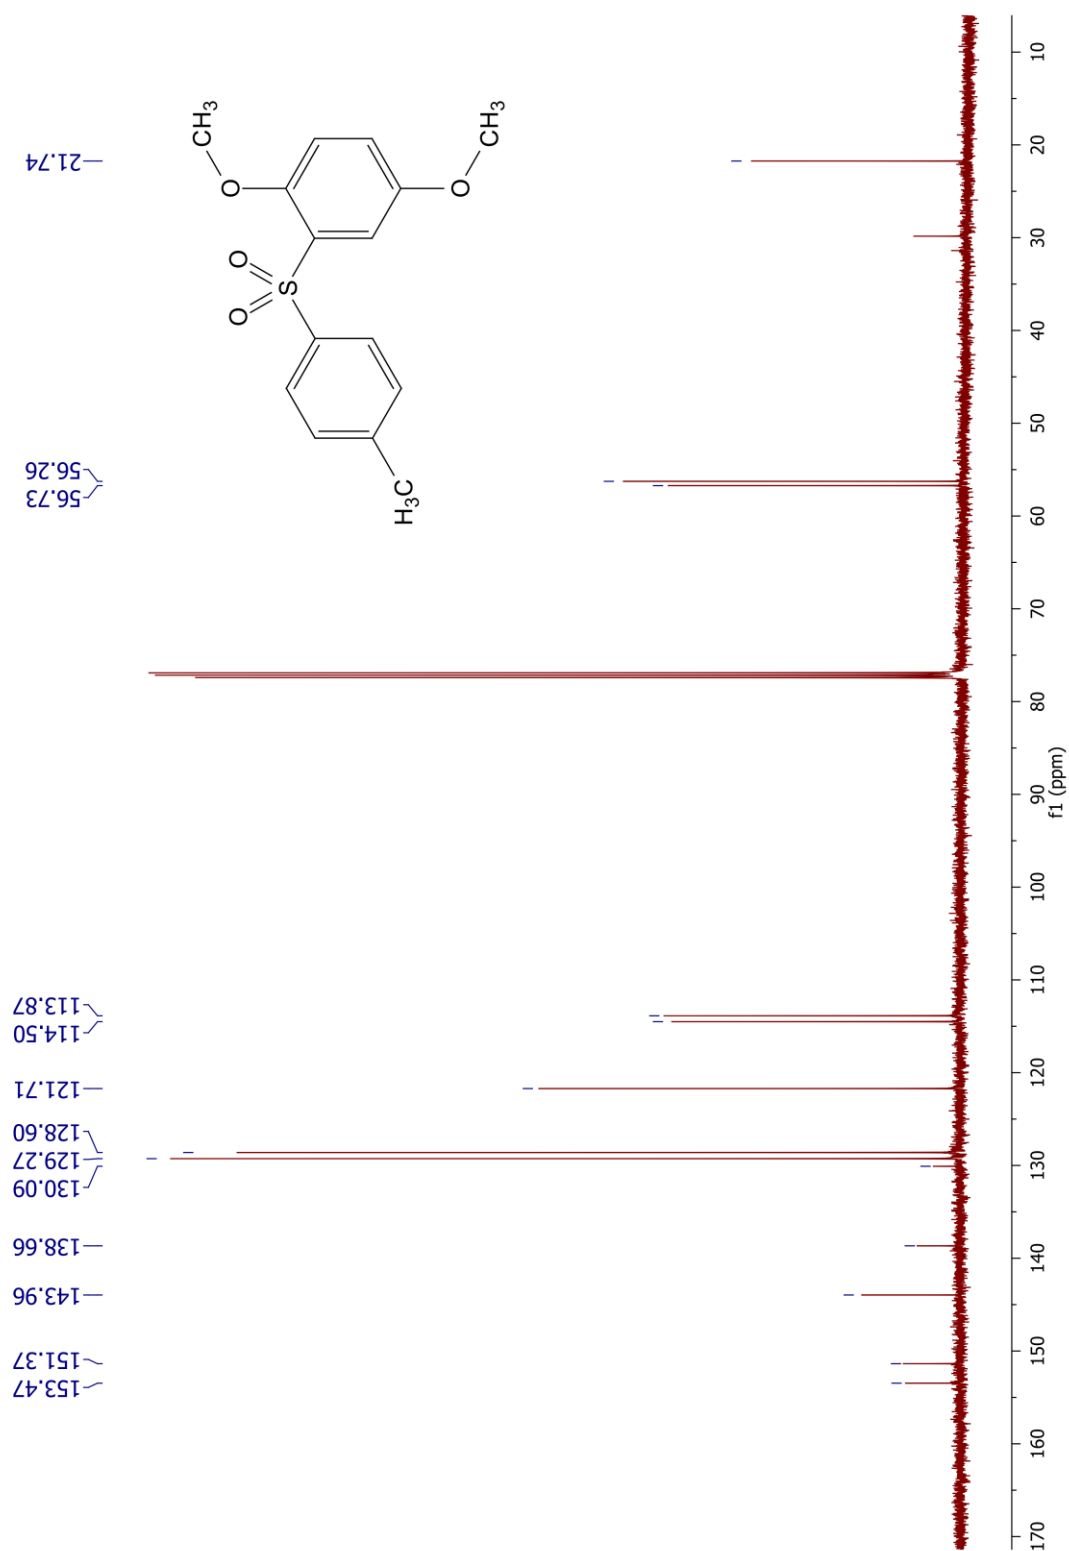

**Figure S42.** <sup>13</sup>C-NMR of 1,4-dimethoxy-2-tosylbenzene (**3q**)



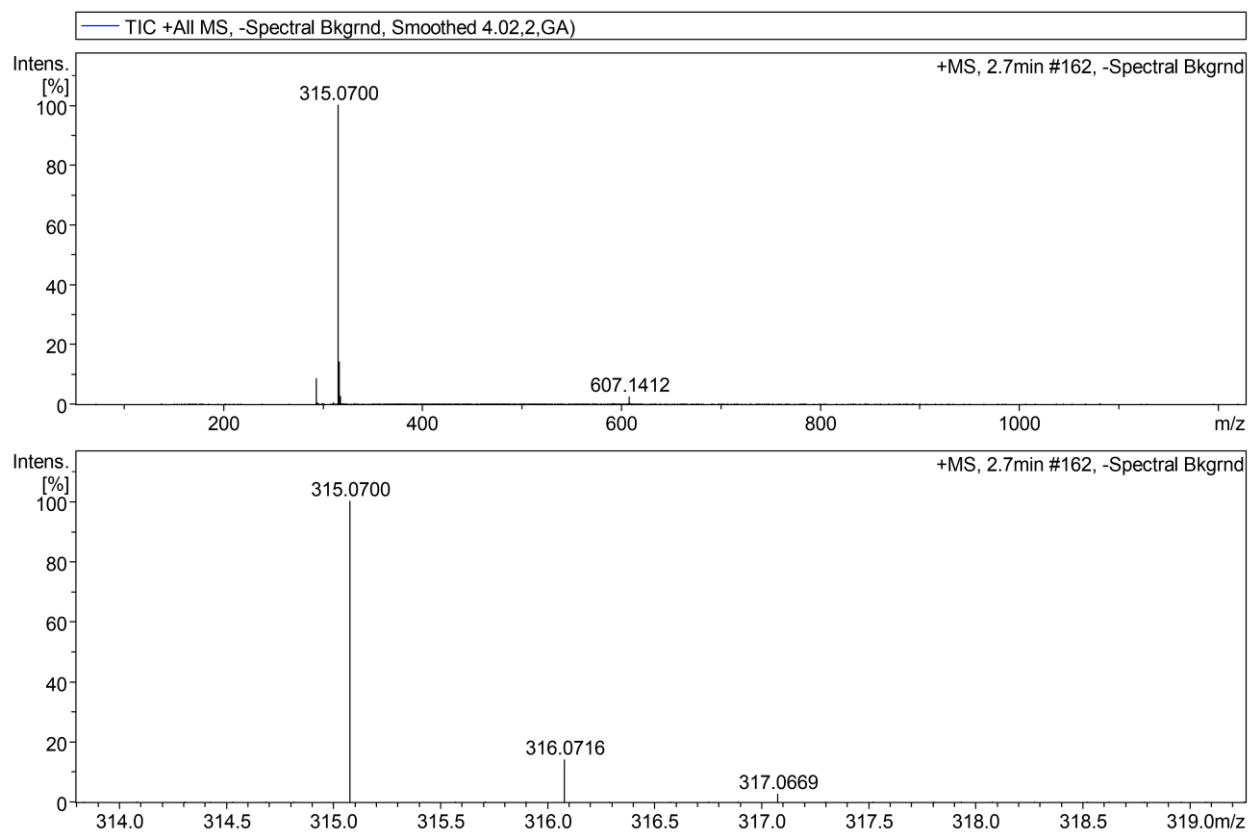

**Figure S43.** HRMS of 1,4-dimethoxy-2-tosylbenzene (**3q**)

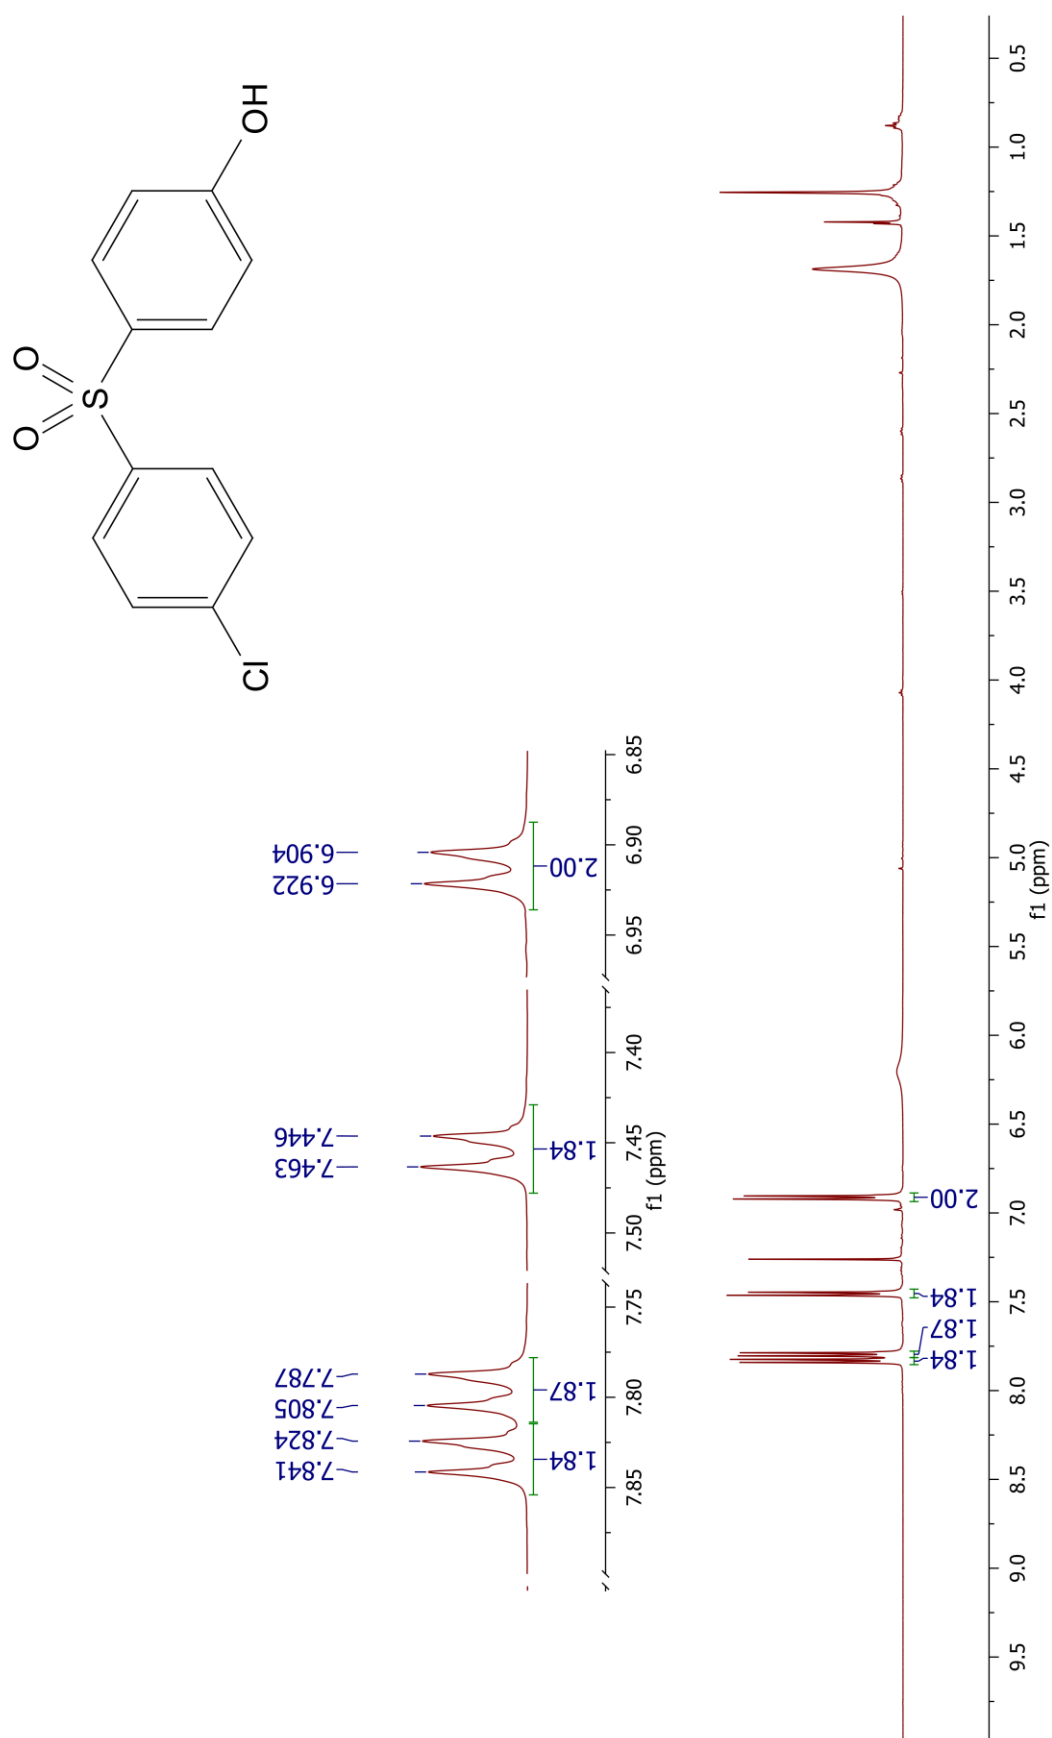

**Figure S44.** <sup>1</sup>H-NMR of 4-((4-chlorophenyl)sulfonyl)phenol (3r)

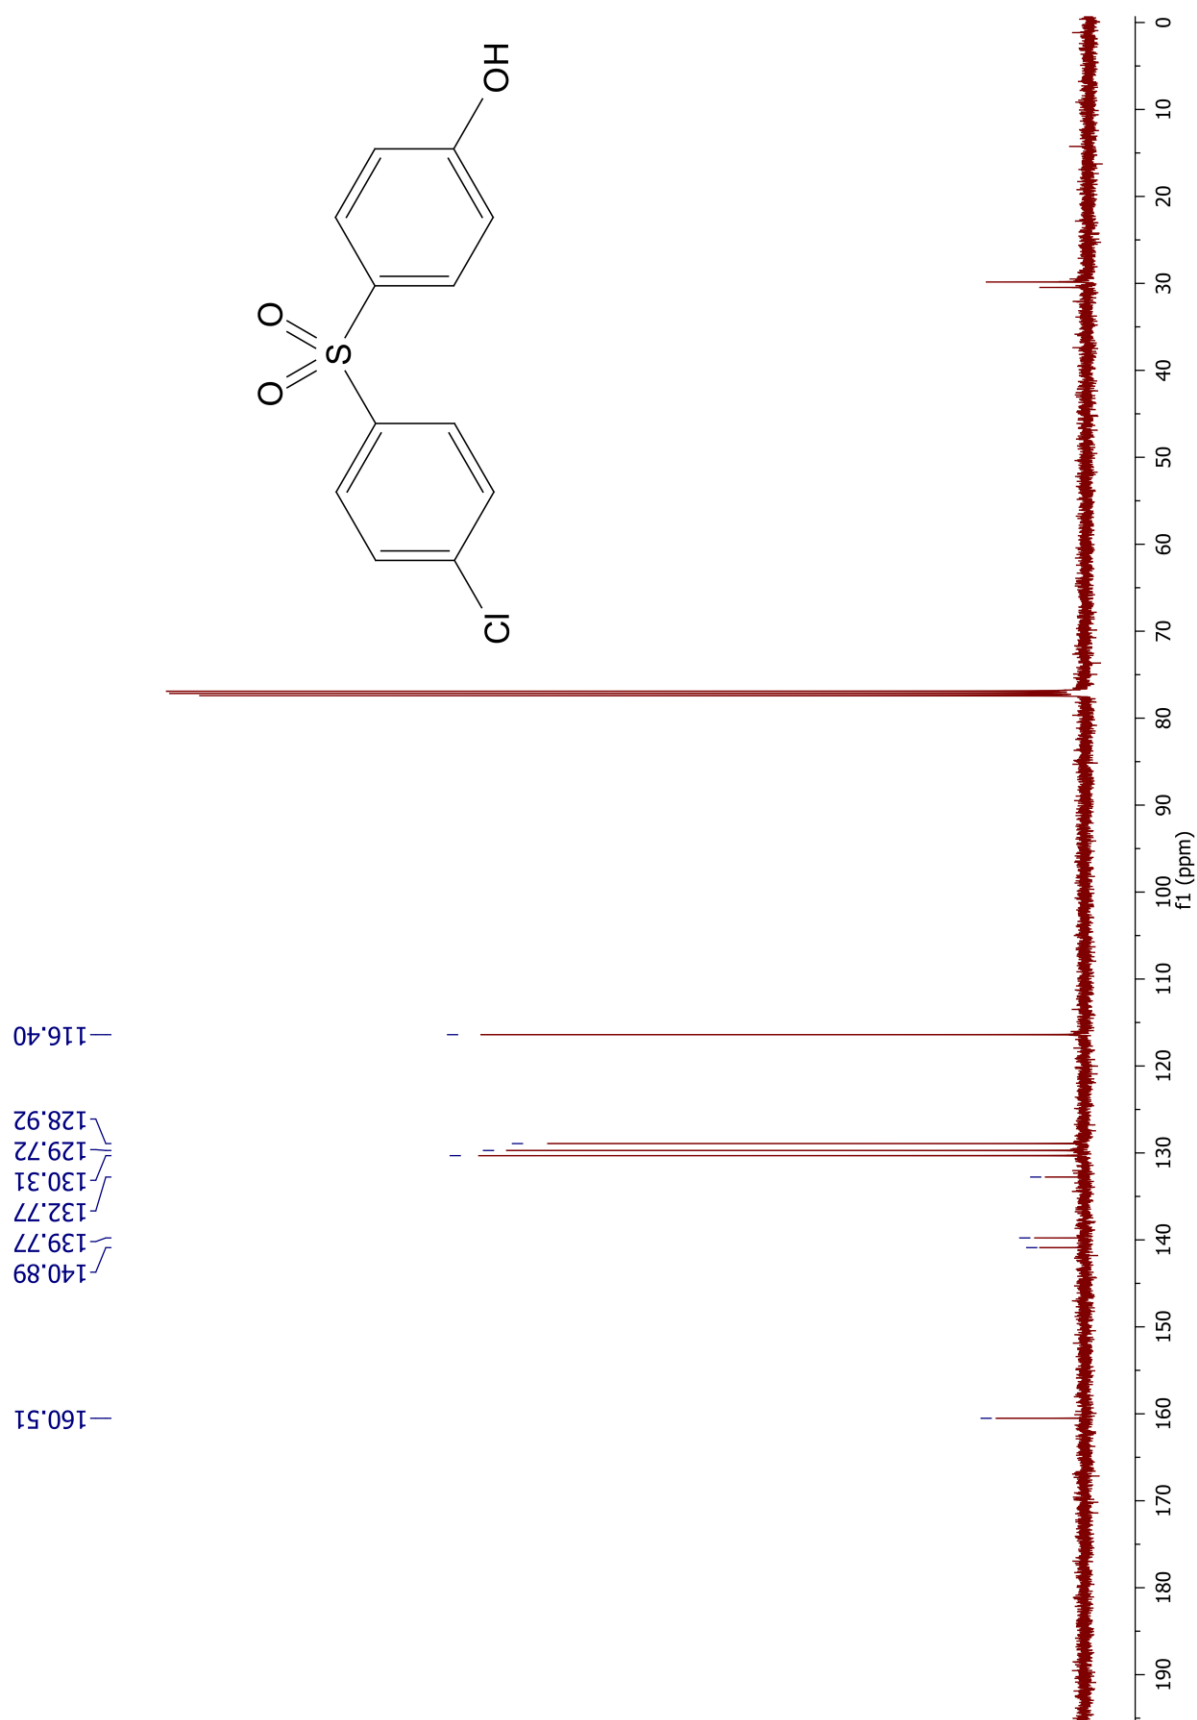

**Figure S45.** <sup>13</sup>C-NMR of 4-((4-chlorophenyl)sulfonyl)phenol (3r)

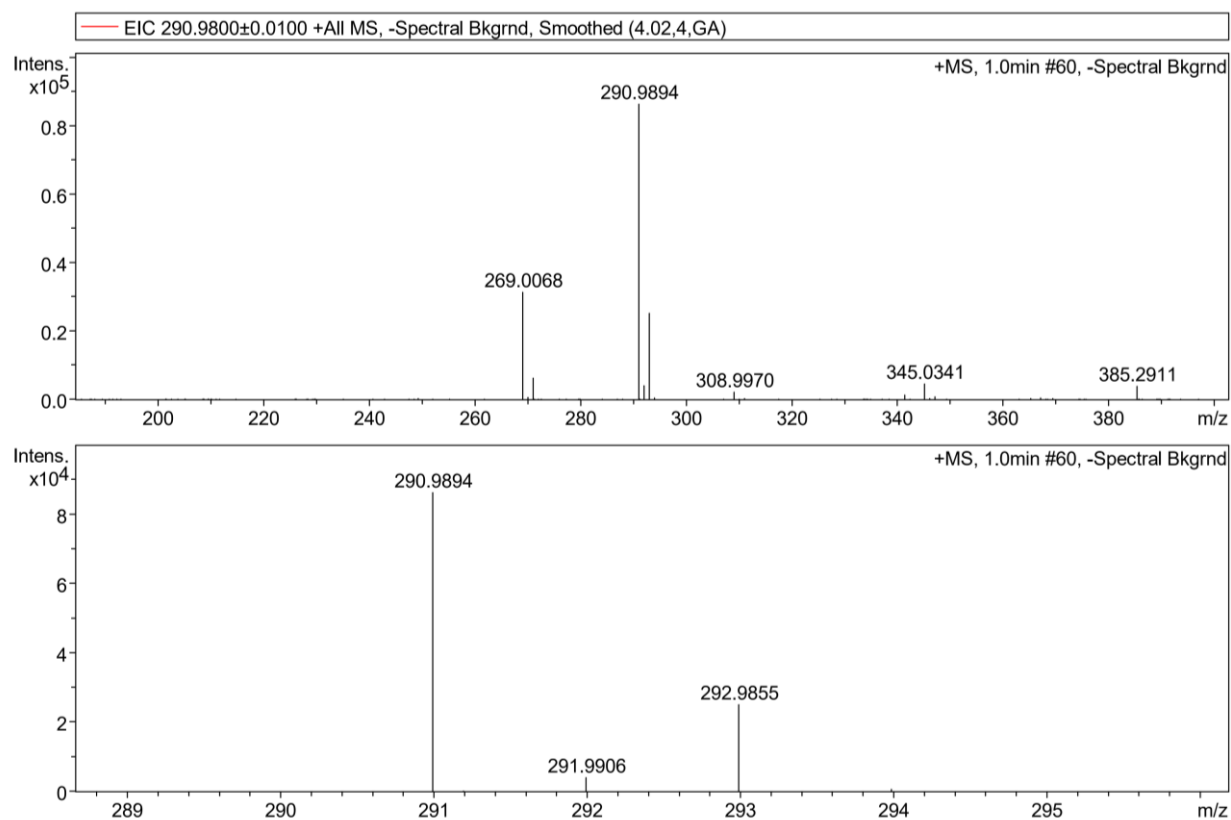

**Figure S46.** HRMS of 4-((4-chlorophenyl)sulfonyl)phenol (**3r**)

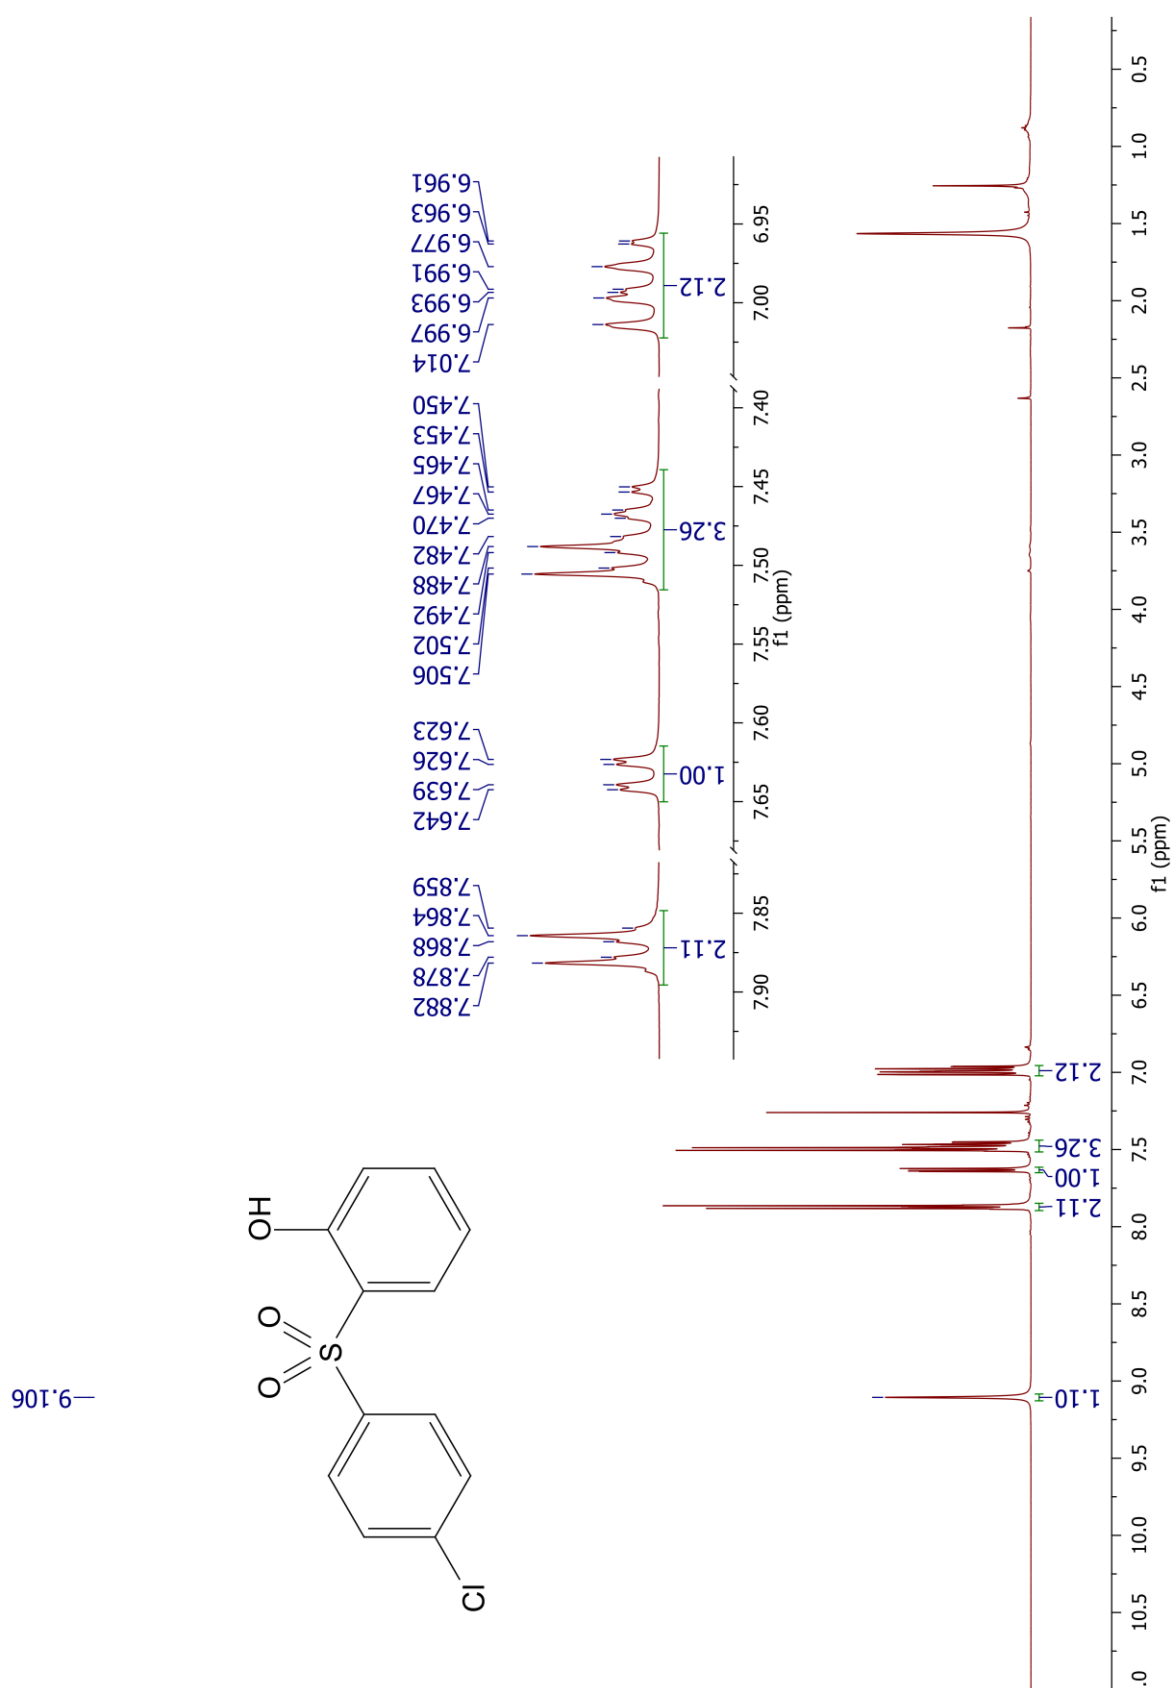

**Figure S47.** <sup>1</sup>H-NMR of 2-((4-chlorophenyl)sulfonyl)phenol (**3r'**)

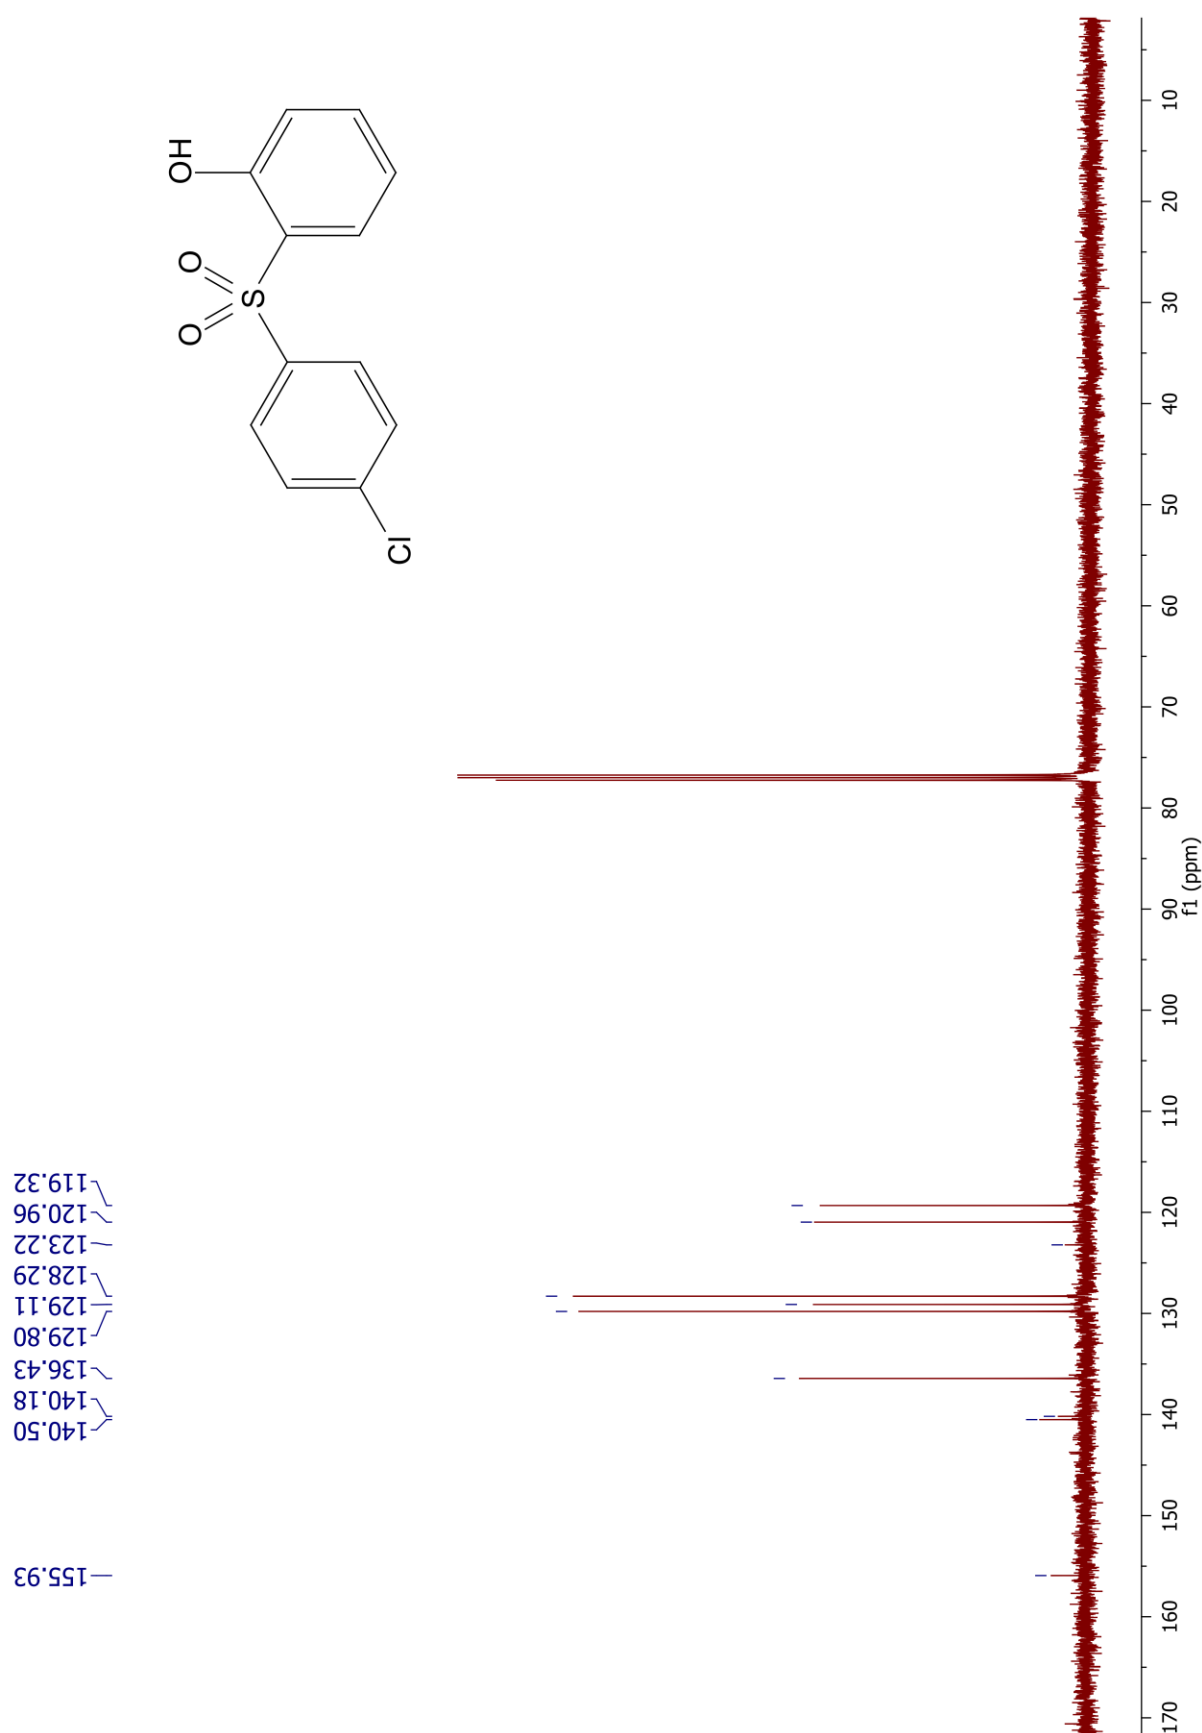

**Figure S48.** <sup>13</sup>C-NMR of 2-((4-chlorophenyl)sulfonyl)phenol (**3r'**)

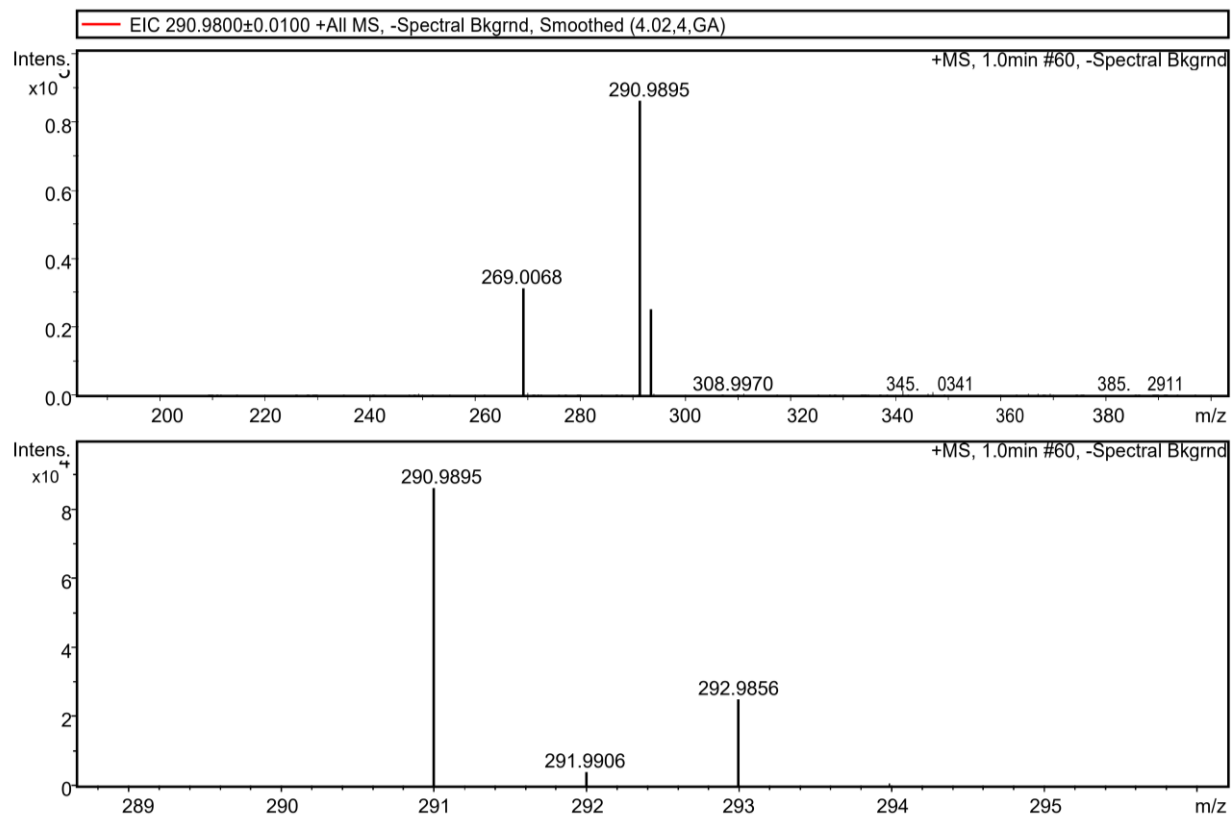

**Figure S49.** HRMS of 2-((4-chlorophenyl)sulfonyl)phenol (**3r'**)

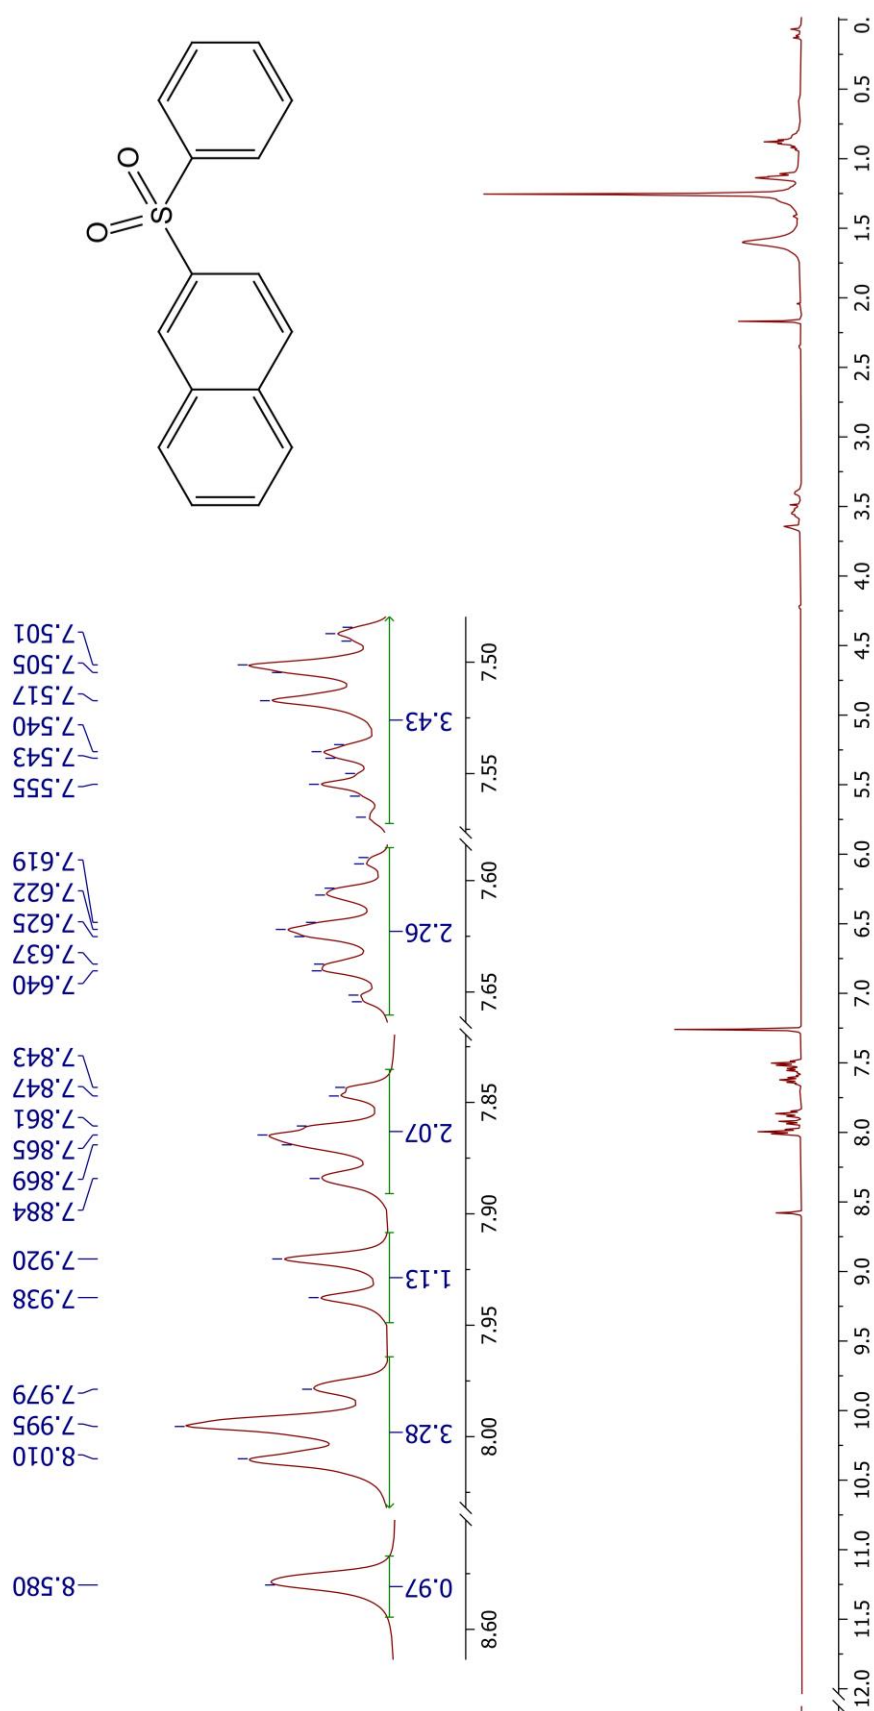

**Figure S50.** <sup>1</sup>H-NMR of 2-(phenylsulfonyl)naphthalene (**3s'**)



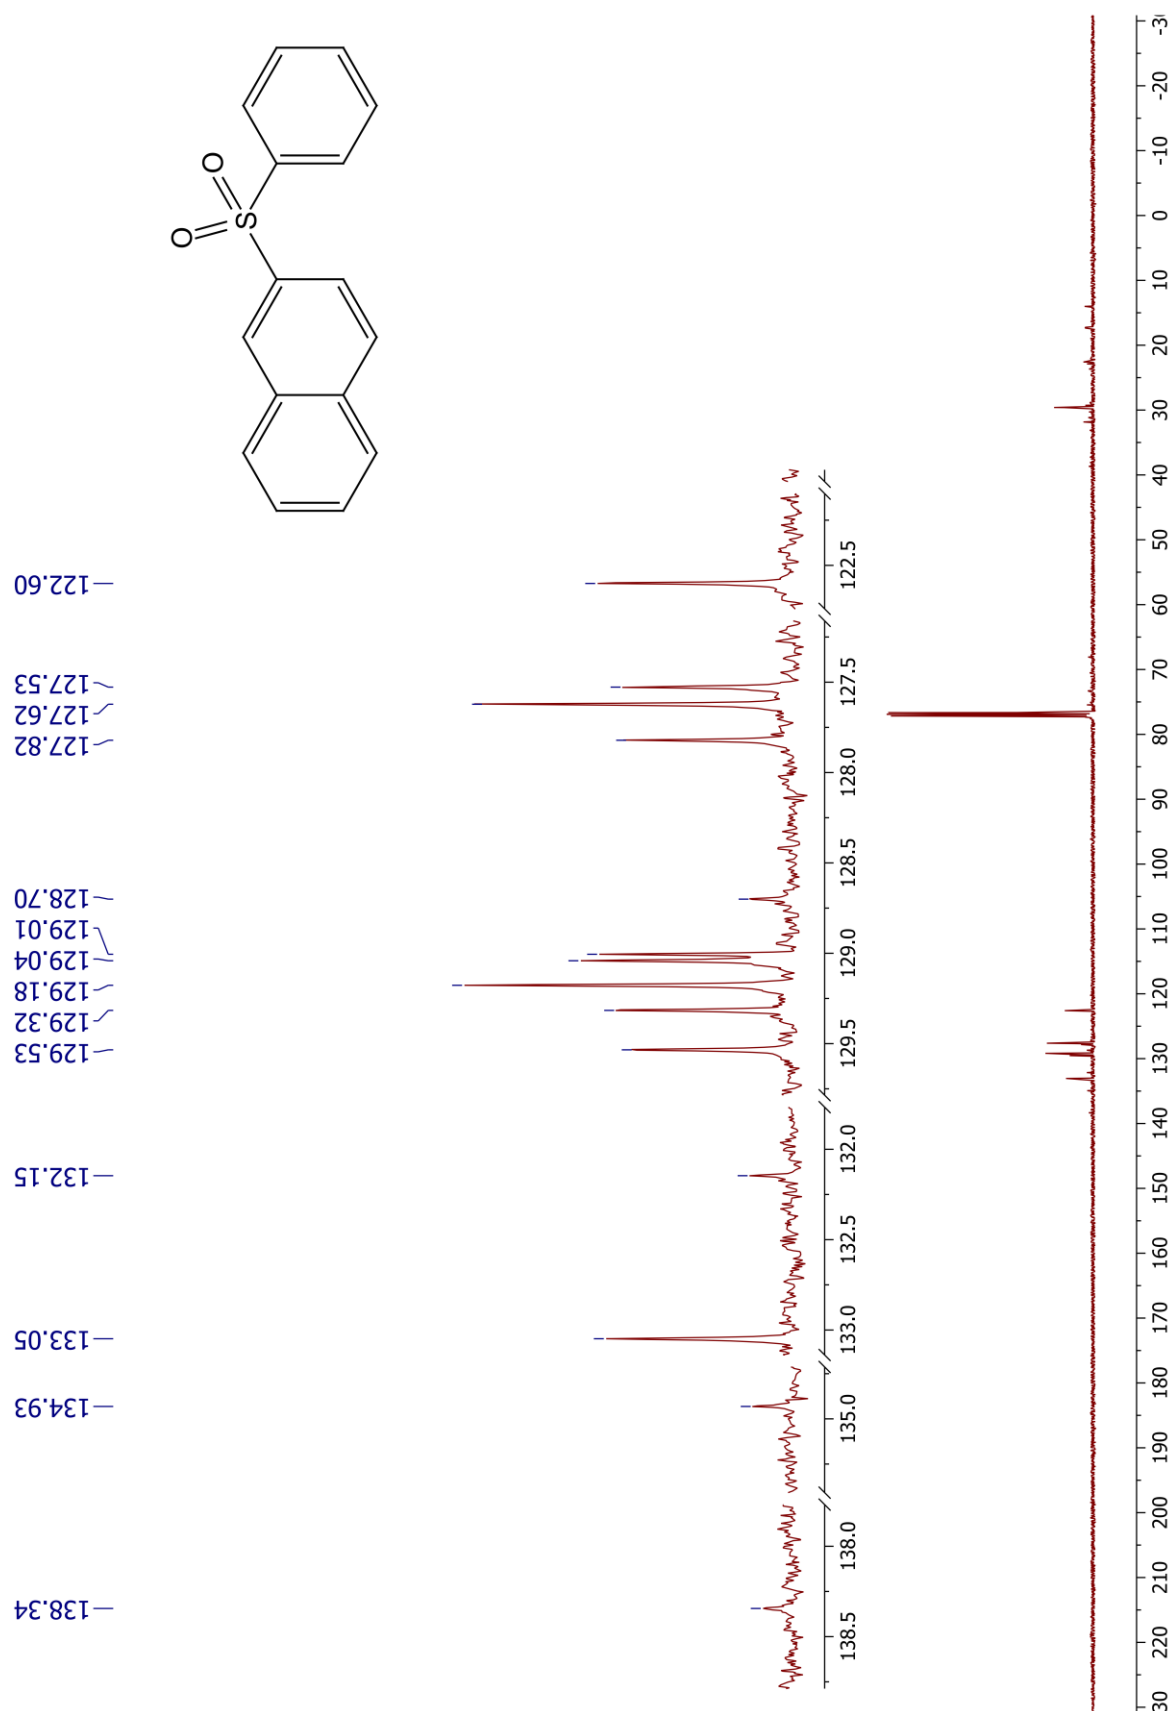

**Figure S51.** <sup>13</sup>C-NMR of 2-(phenylsulfonyl)naphthalene (**3s'**)

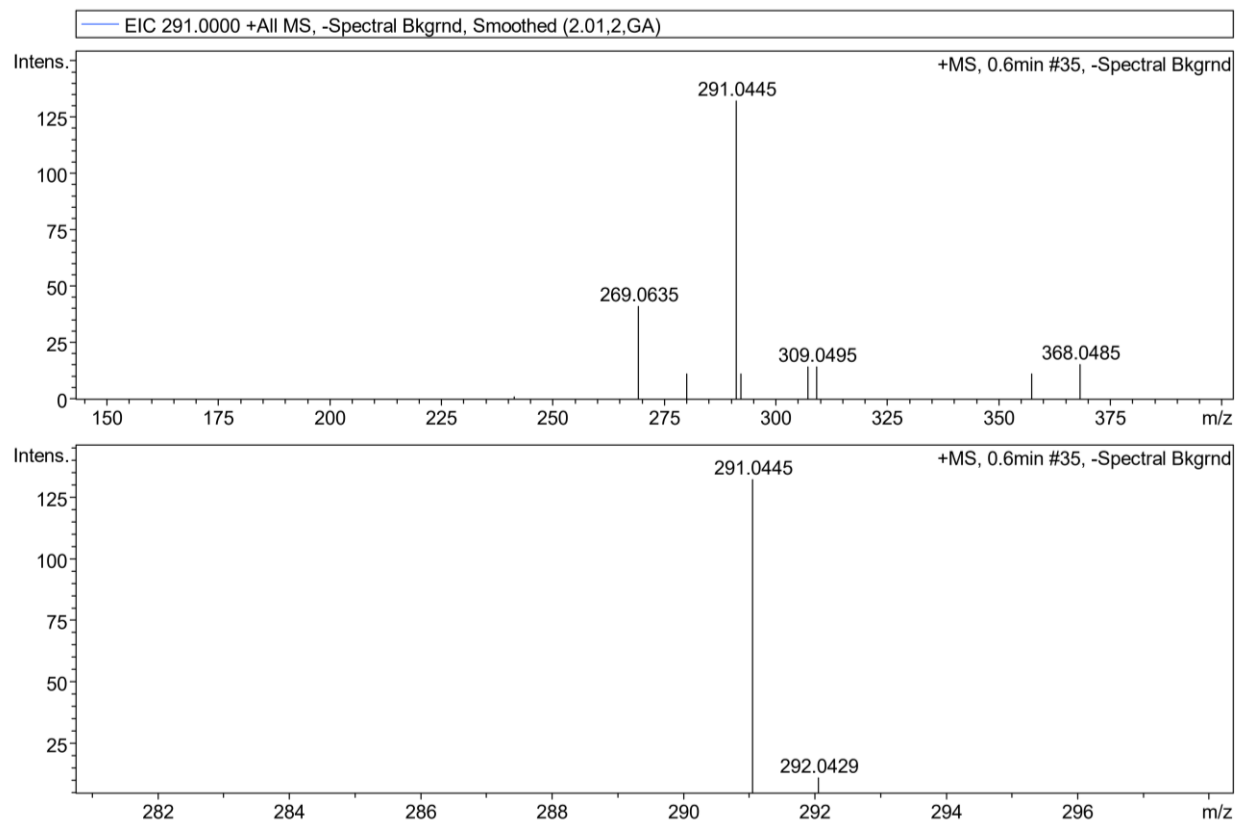

**Figure S52.** HRMS of 2-(phenylsulfonyl)naphthalene (**3s'**)

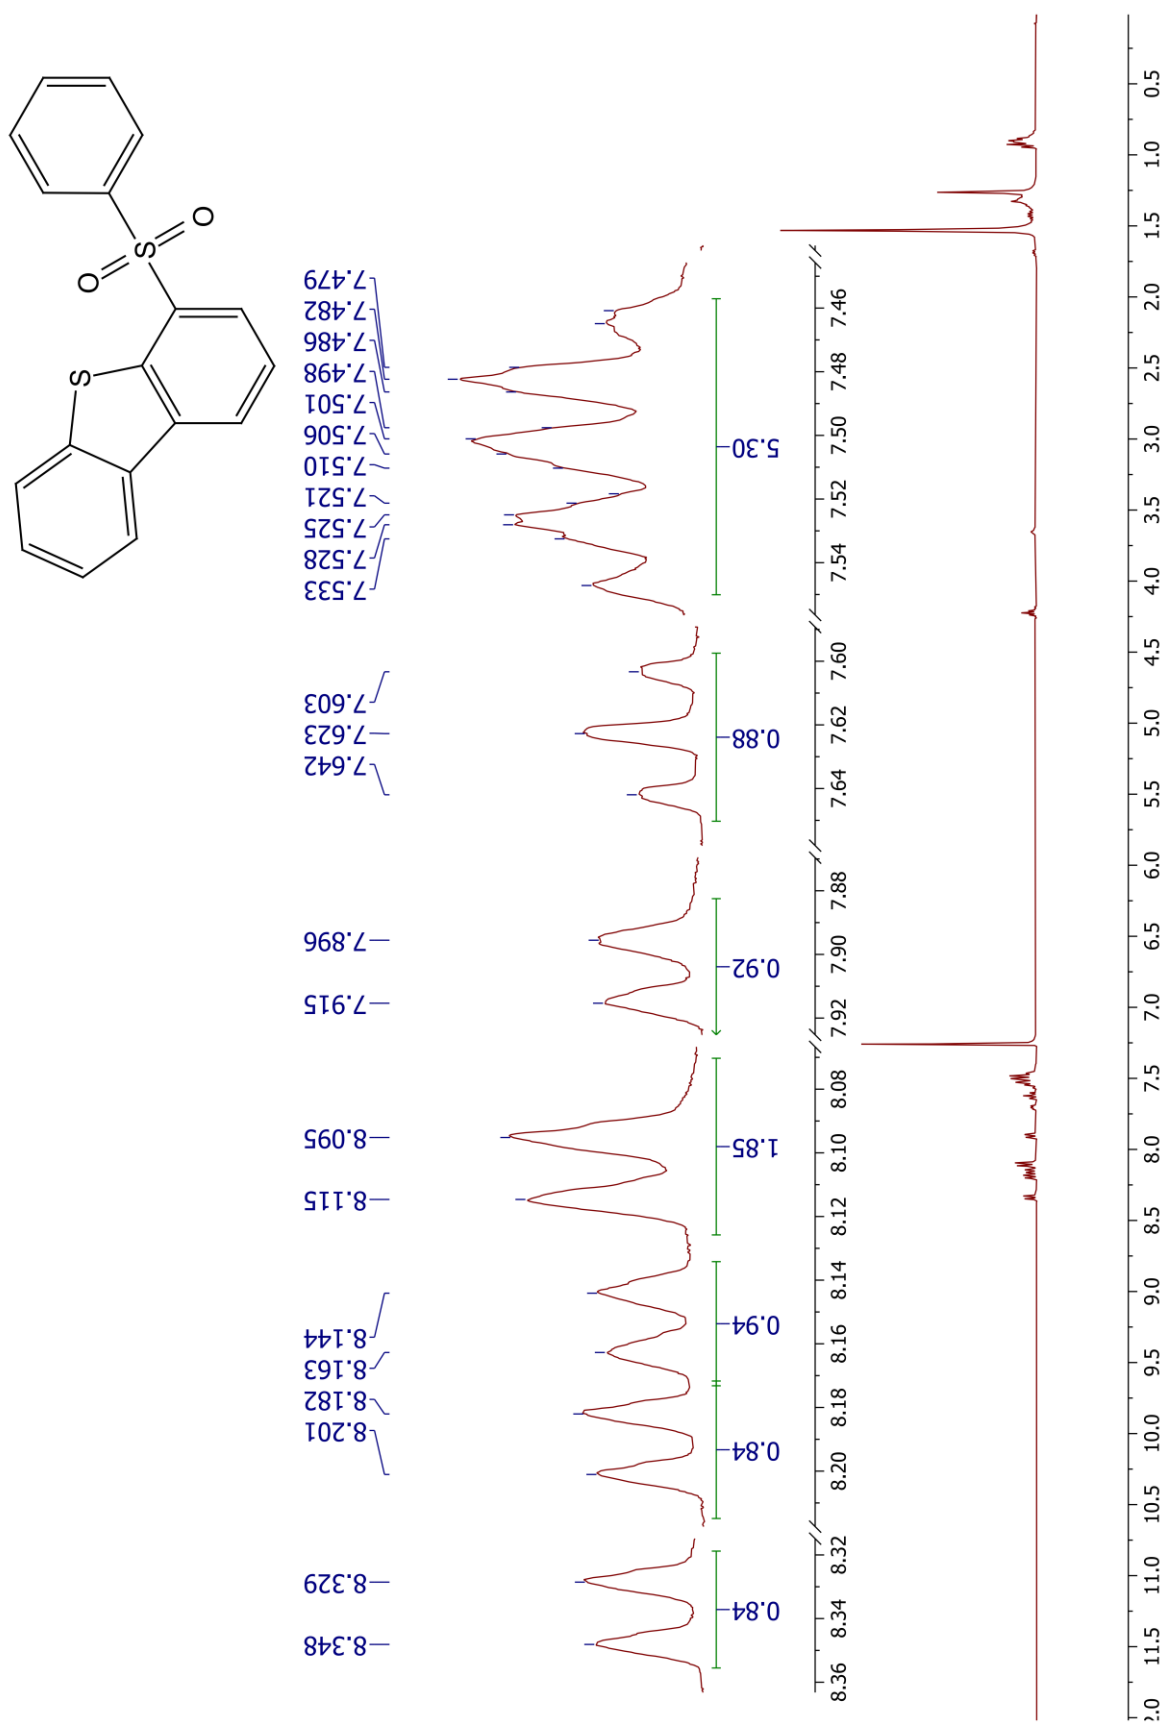

**Figure S53.** <sup>1</sup>H-NMR of 4-(phenylsulfonyl)dibenzo[b,d]thiophene (**3t'**)

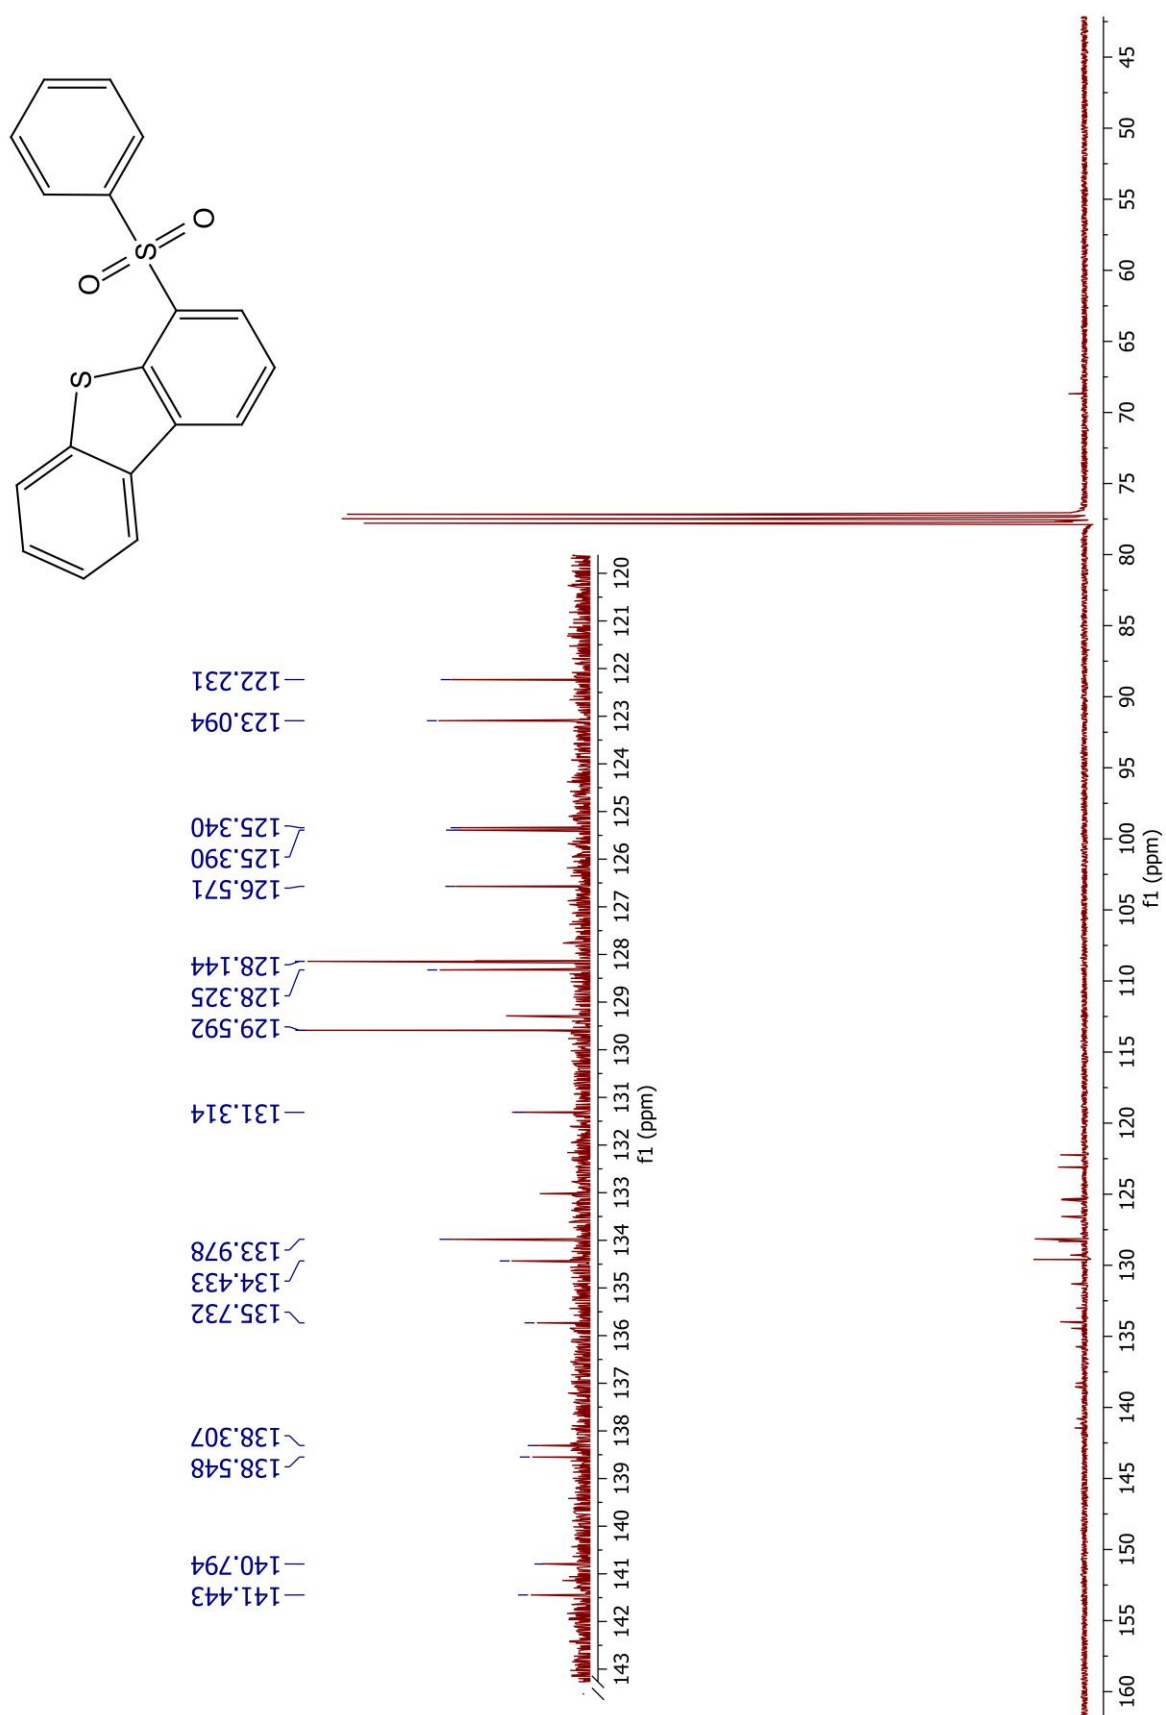

**Figure S54.**  $^{13}\text{C}$ -NMR of 4-(phenylsulfonyl)dibenzo[b,d]thiophene (3t')

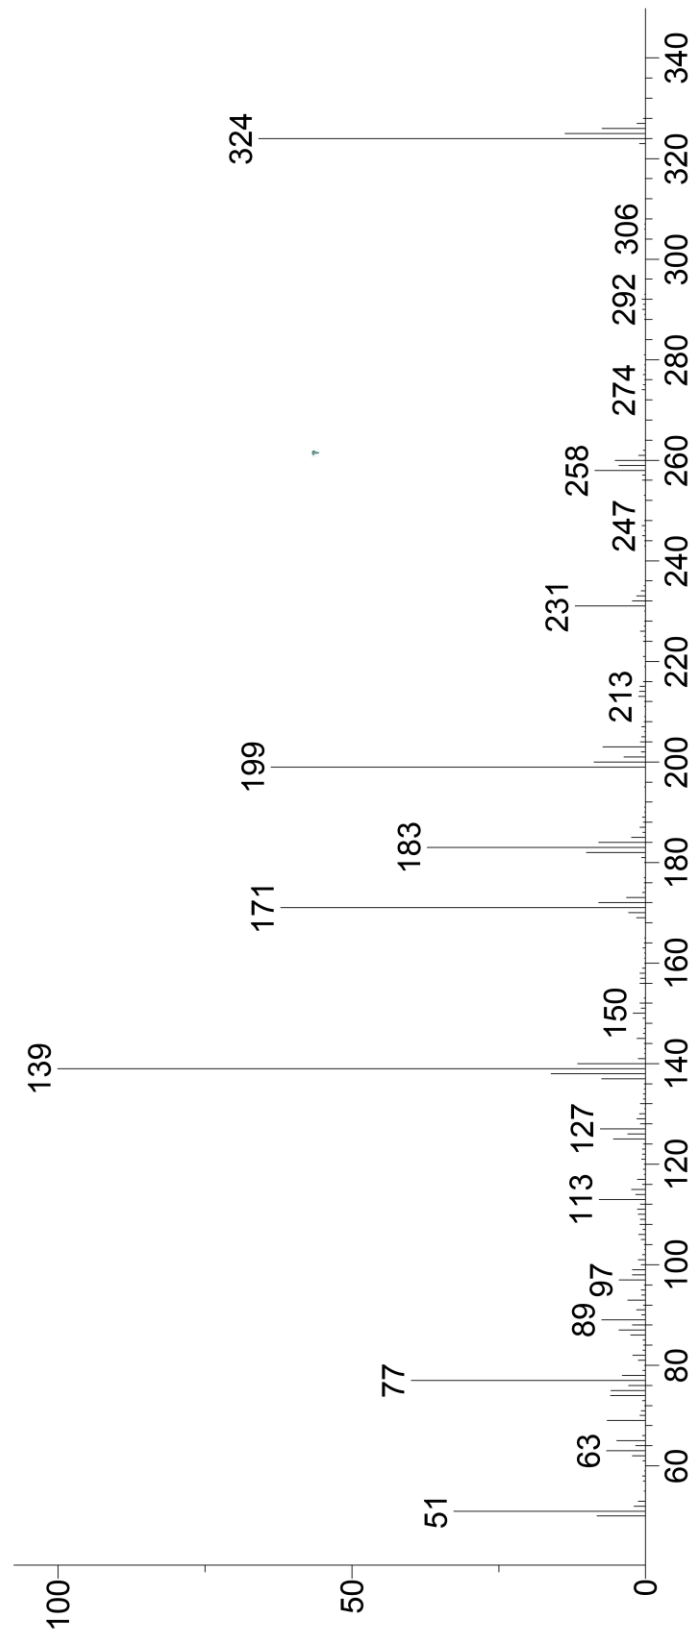

**Figure S55.** GC-MS of 4-(phenylsulfonyl)dibenzo[b,d]thiophene (**3t'**)

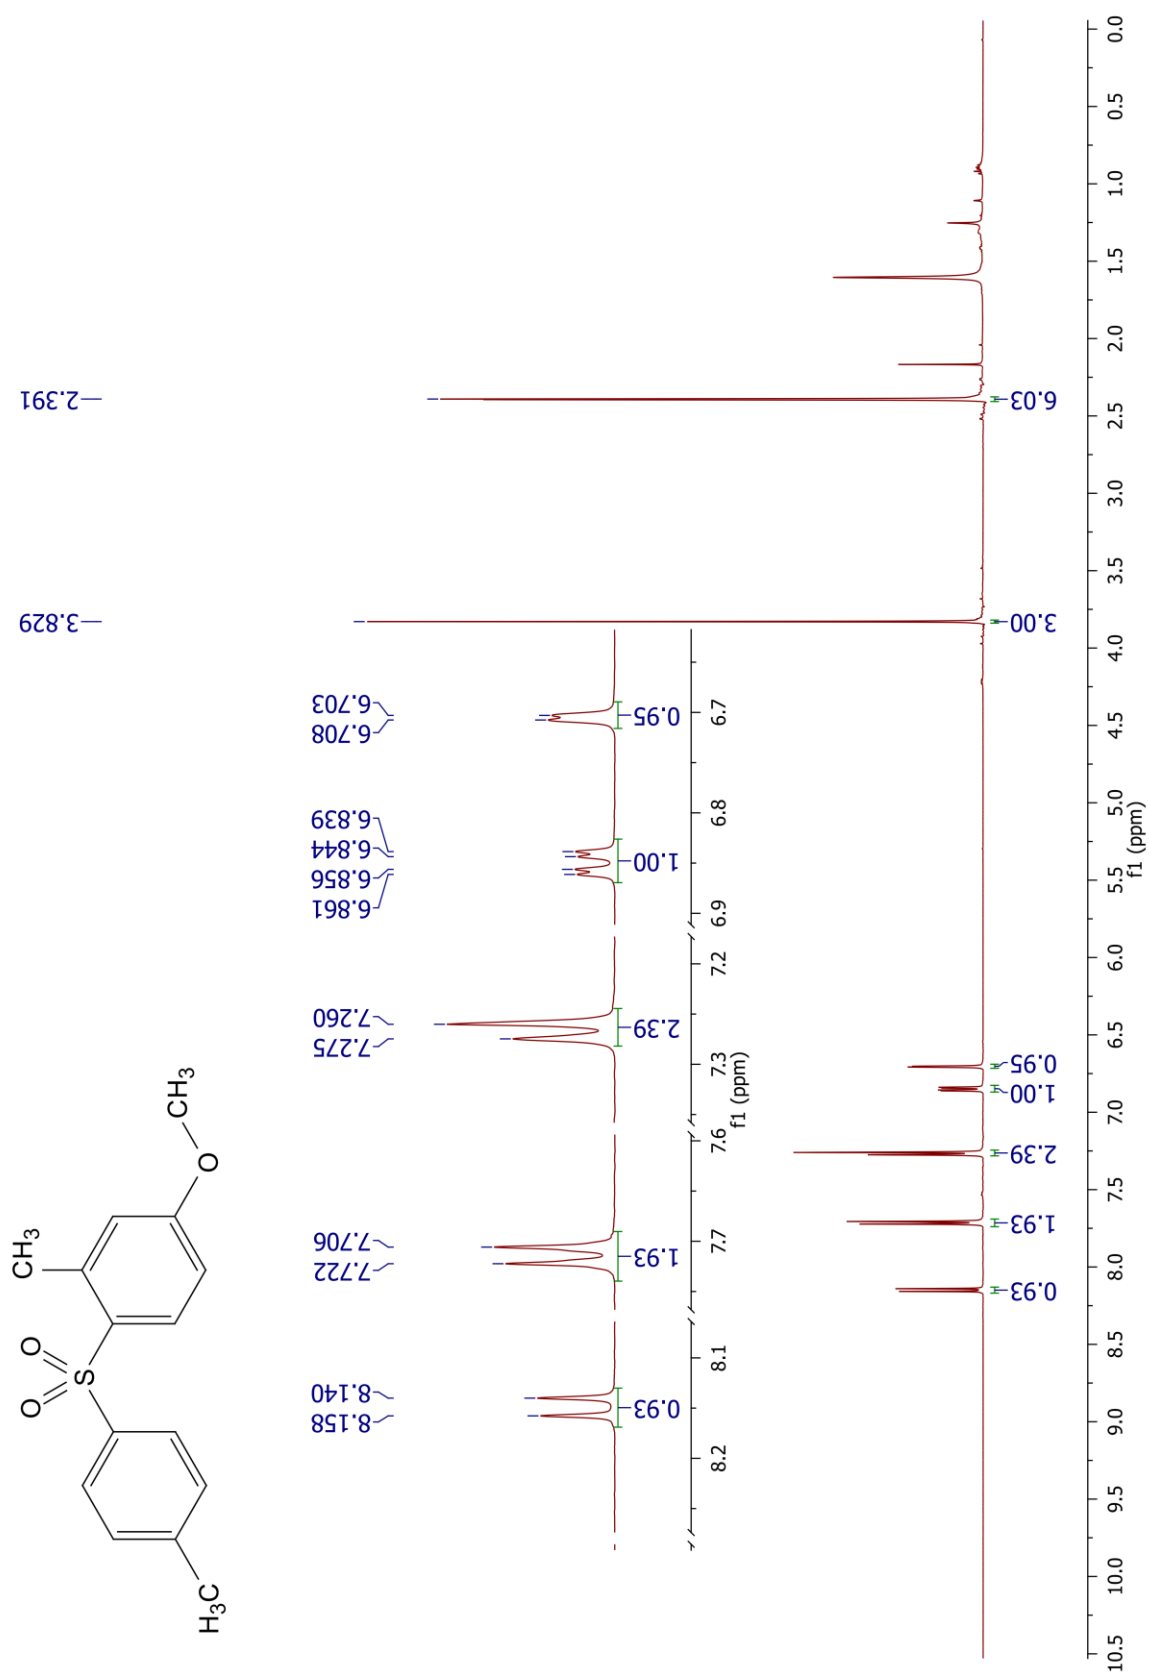

**Figure S56.** <sup>1</sup>H-NMR of 4-methoxy-2-methyl-1-tosylbenzene (**3v**)

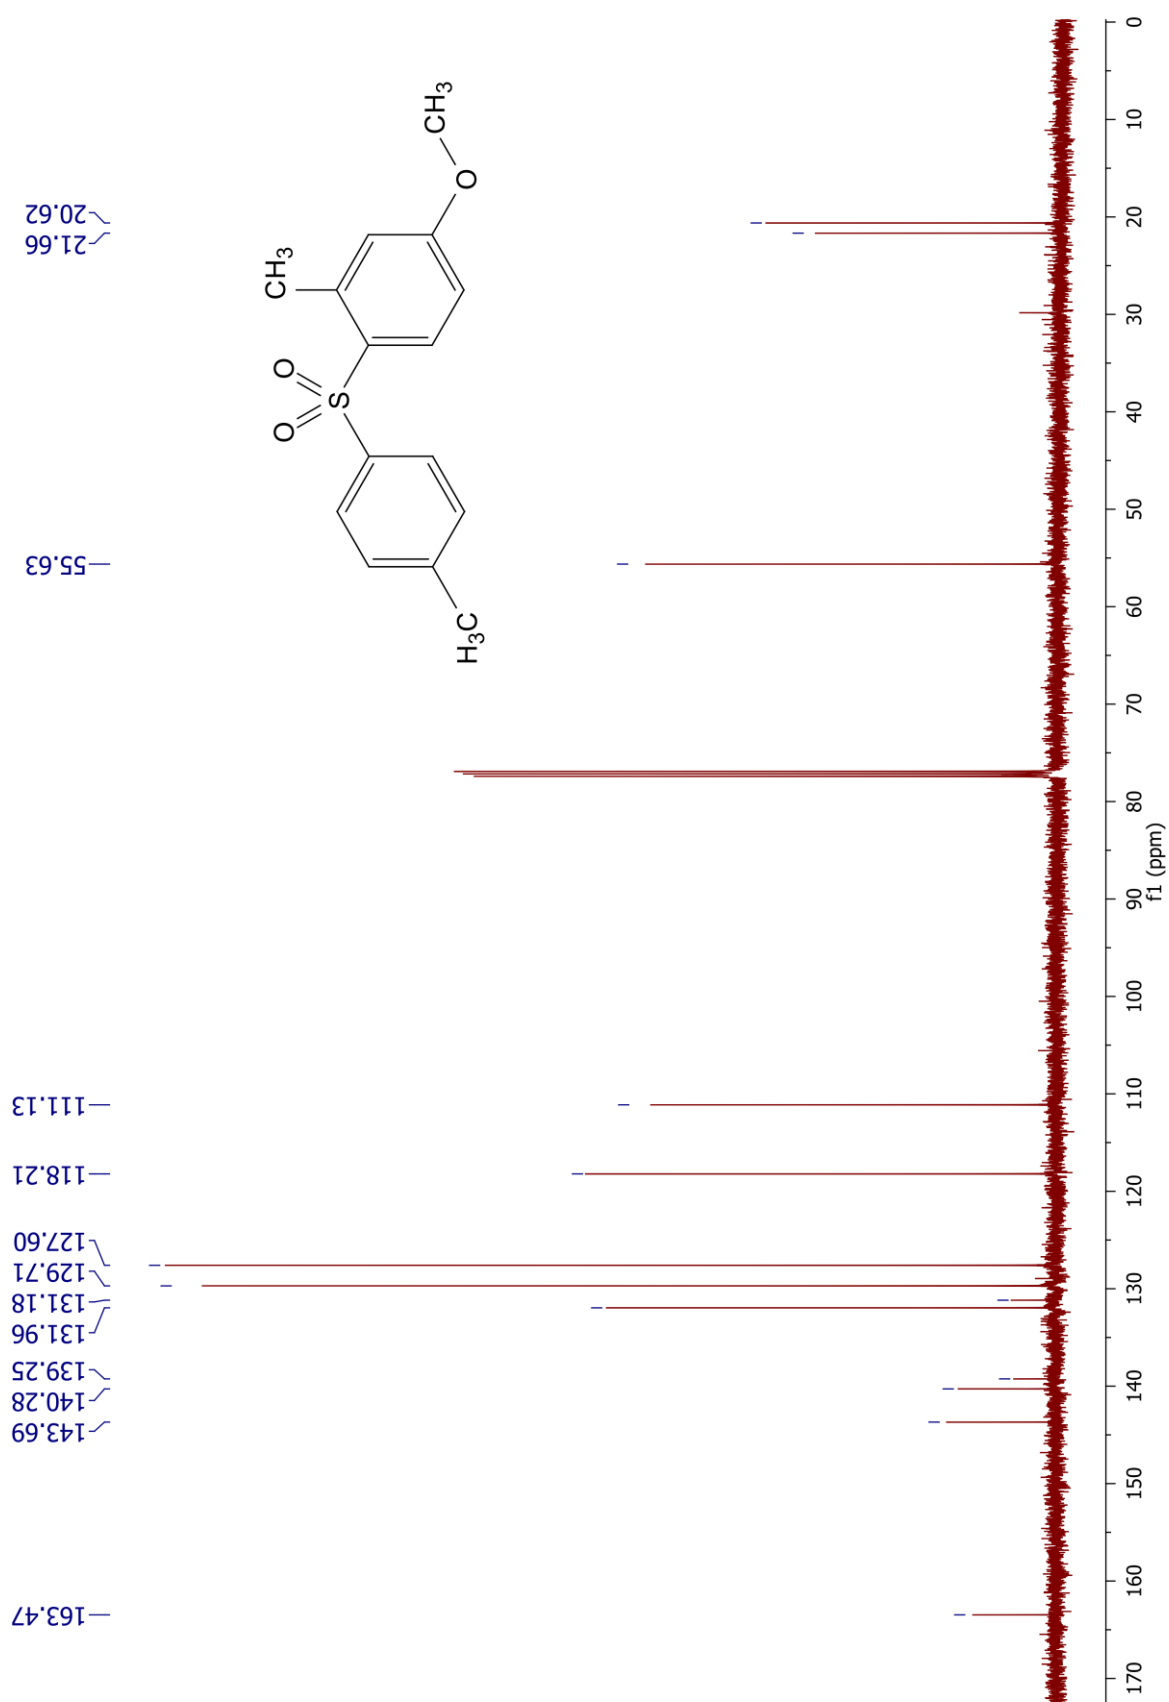

**Figure S57.**  $^{13}\text{C}$ -NMR of 4-methoxy-2-methyl-1-tosylbenzene (3v)

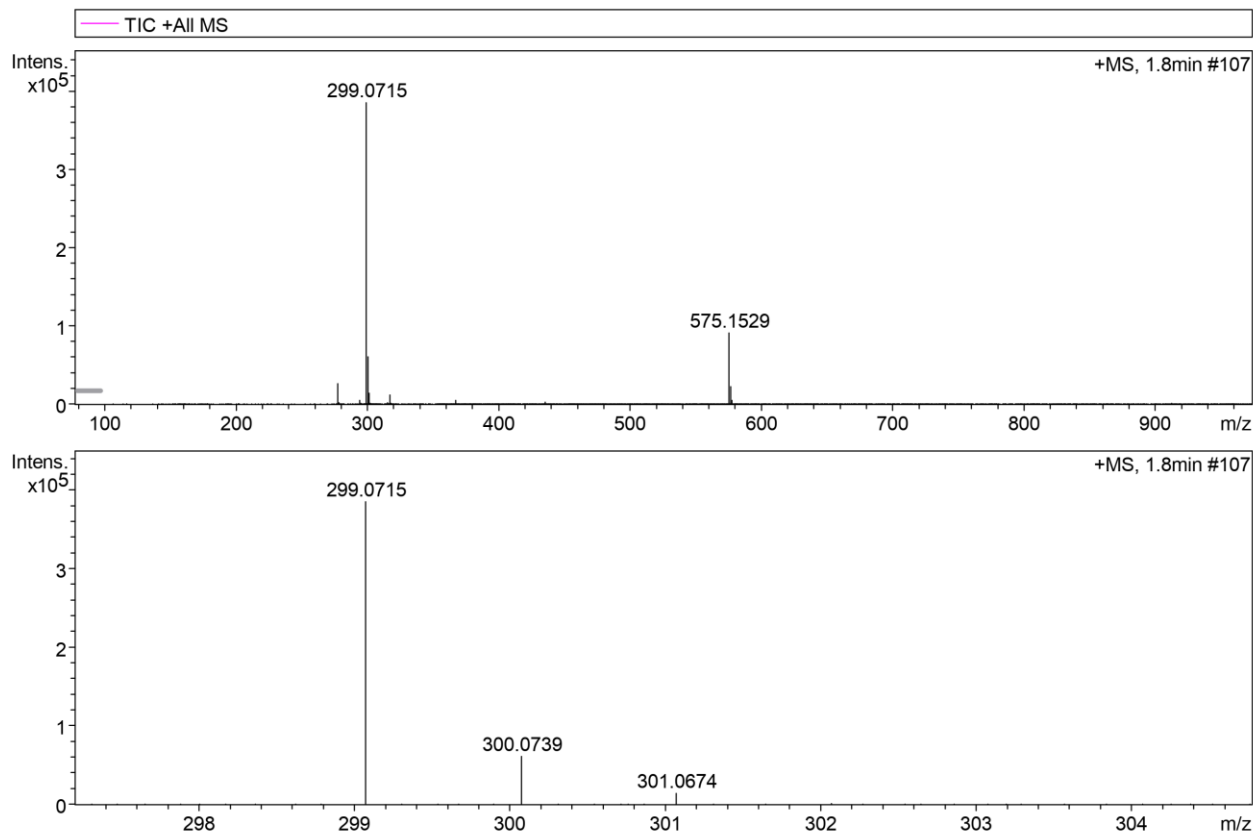

**Figure S58.** HRMS of 4-methoxy-2-methyl-1-tosylbenzene (**3v**)



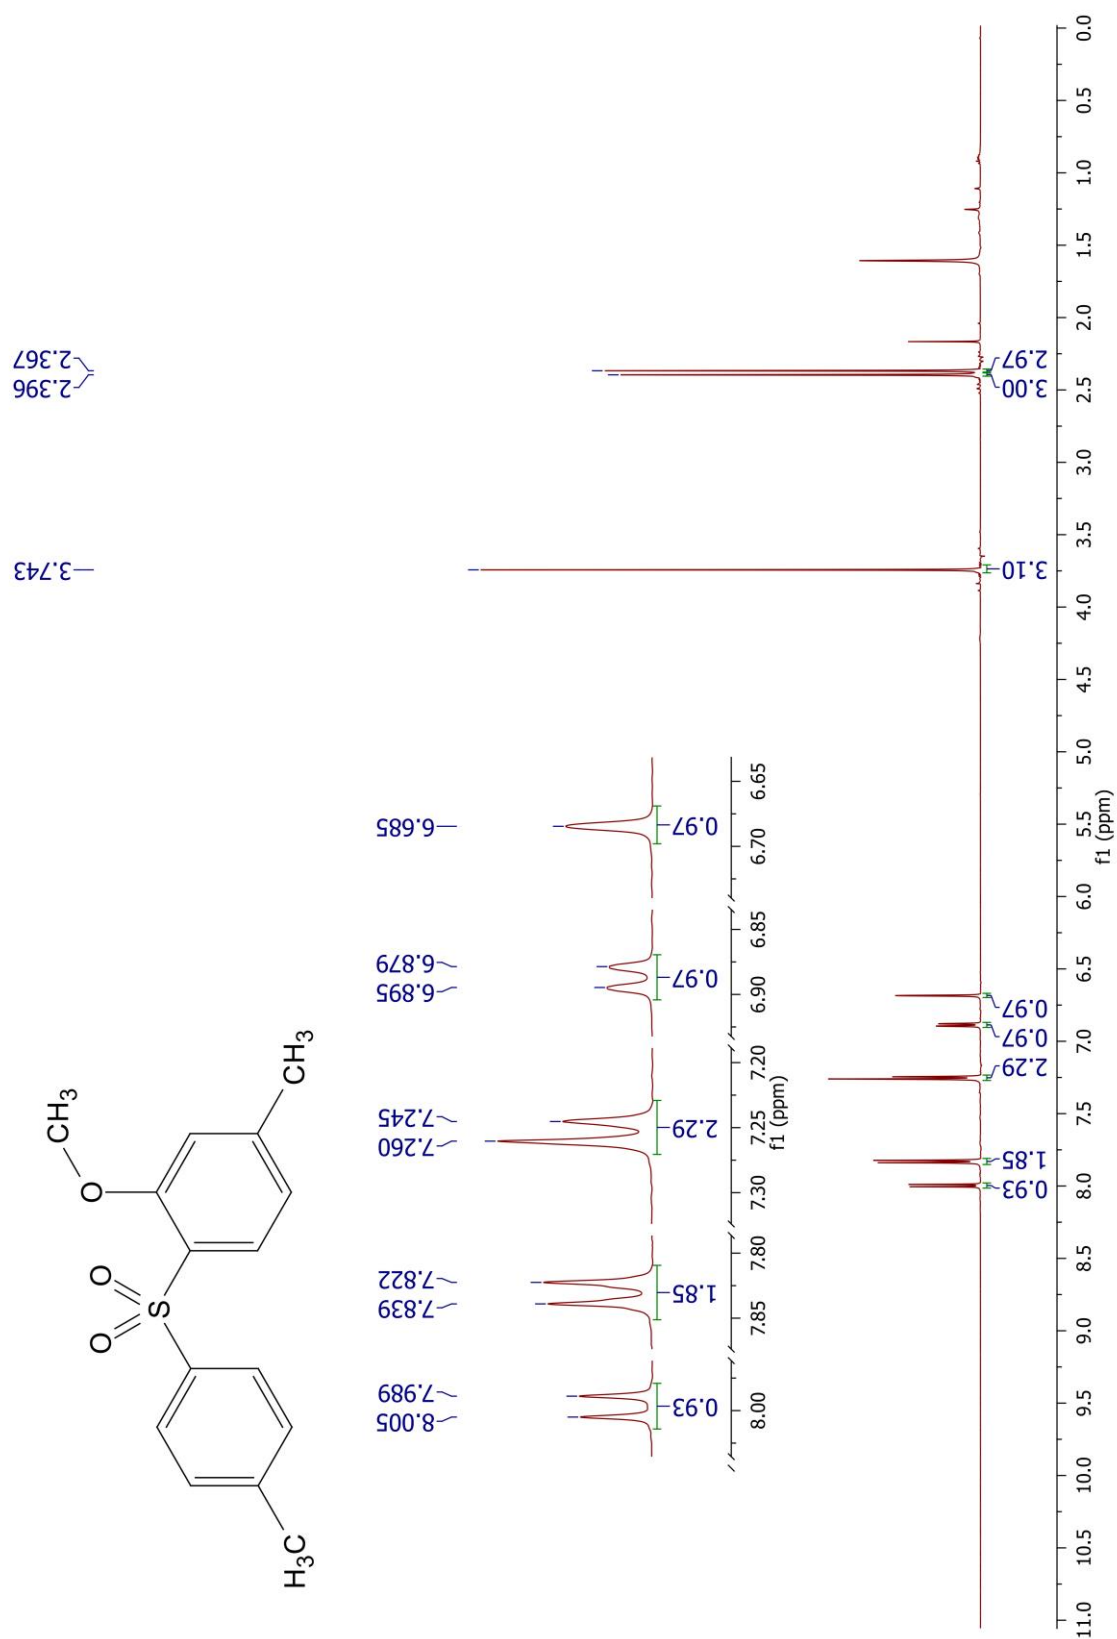

**Figure S59.** <sup>1</sup>H-NMR of 2-methoxy-4-methyl-1-tosylbenzene (**3v'**)

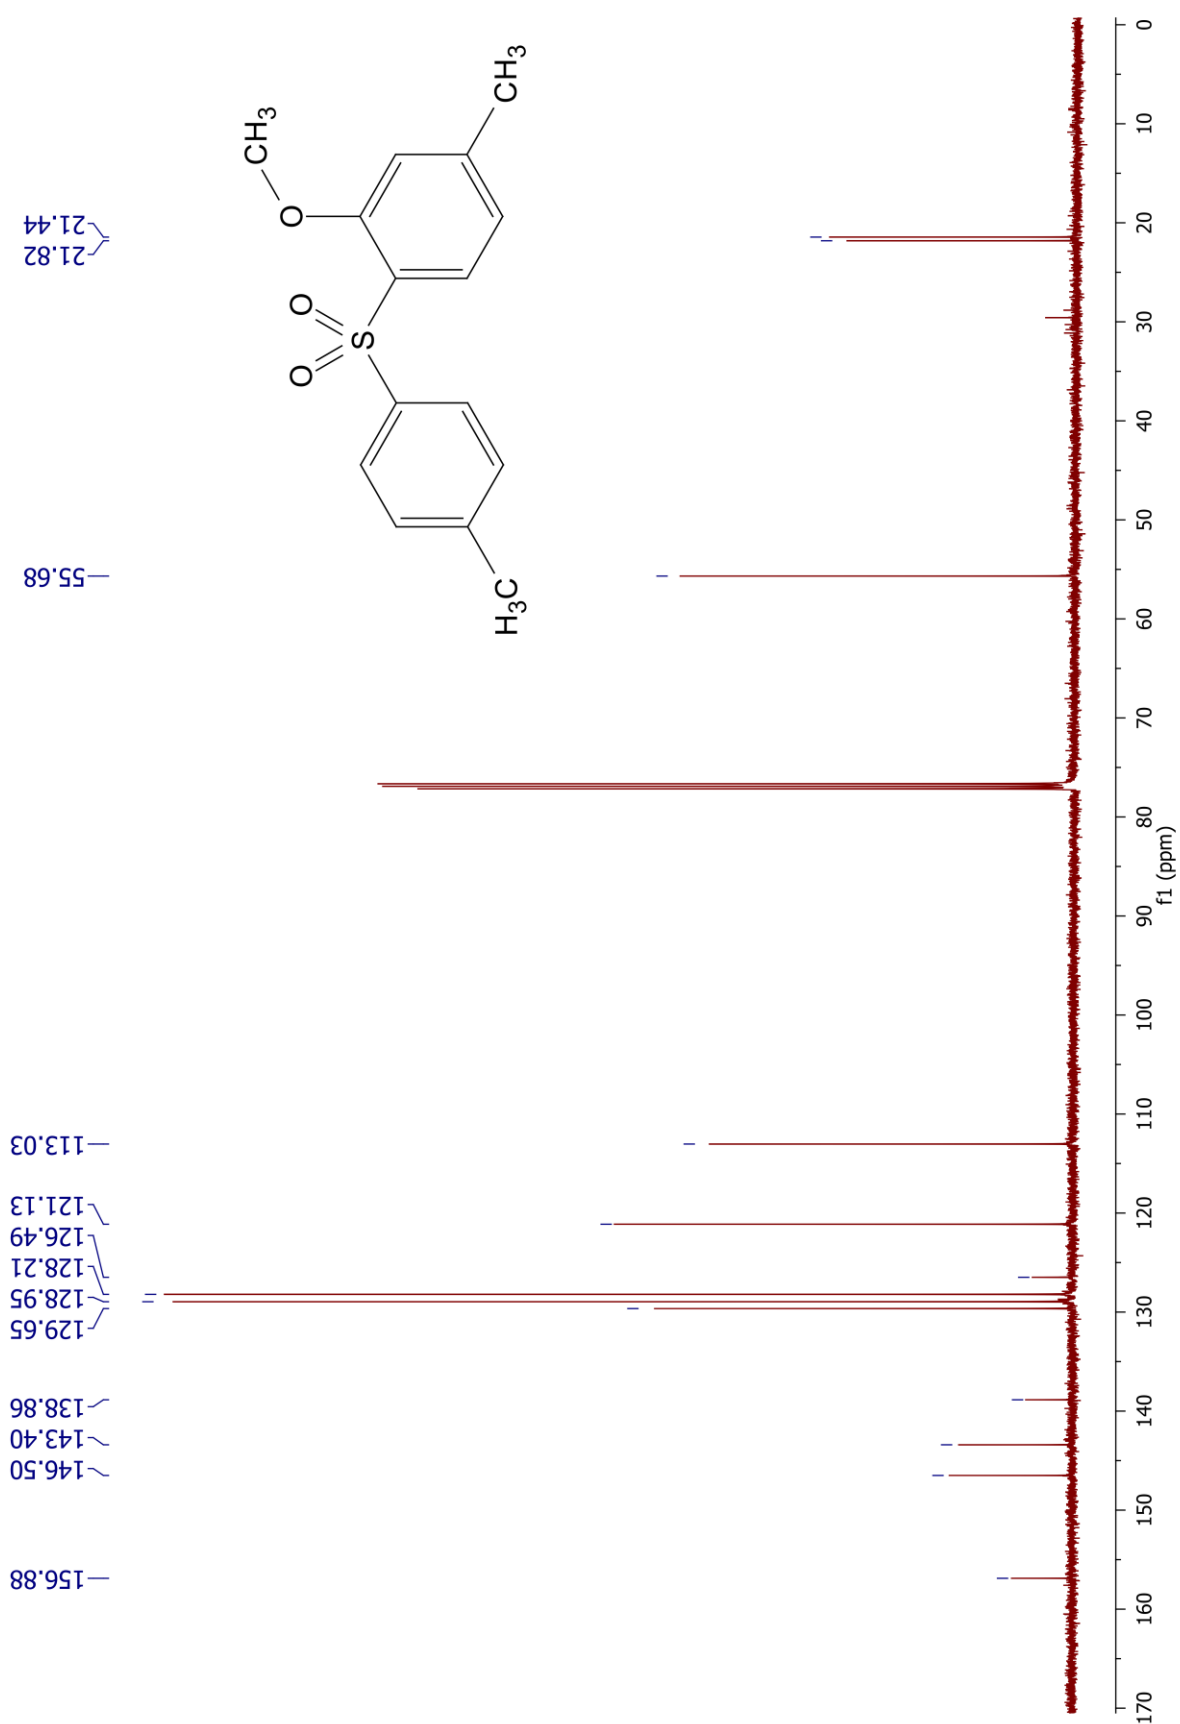

**Figure S60.**  $^{13}\text{C}$ -NMR of 2-methoxy-4-methyl-1-tosylbenzene (3v')

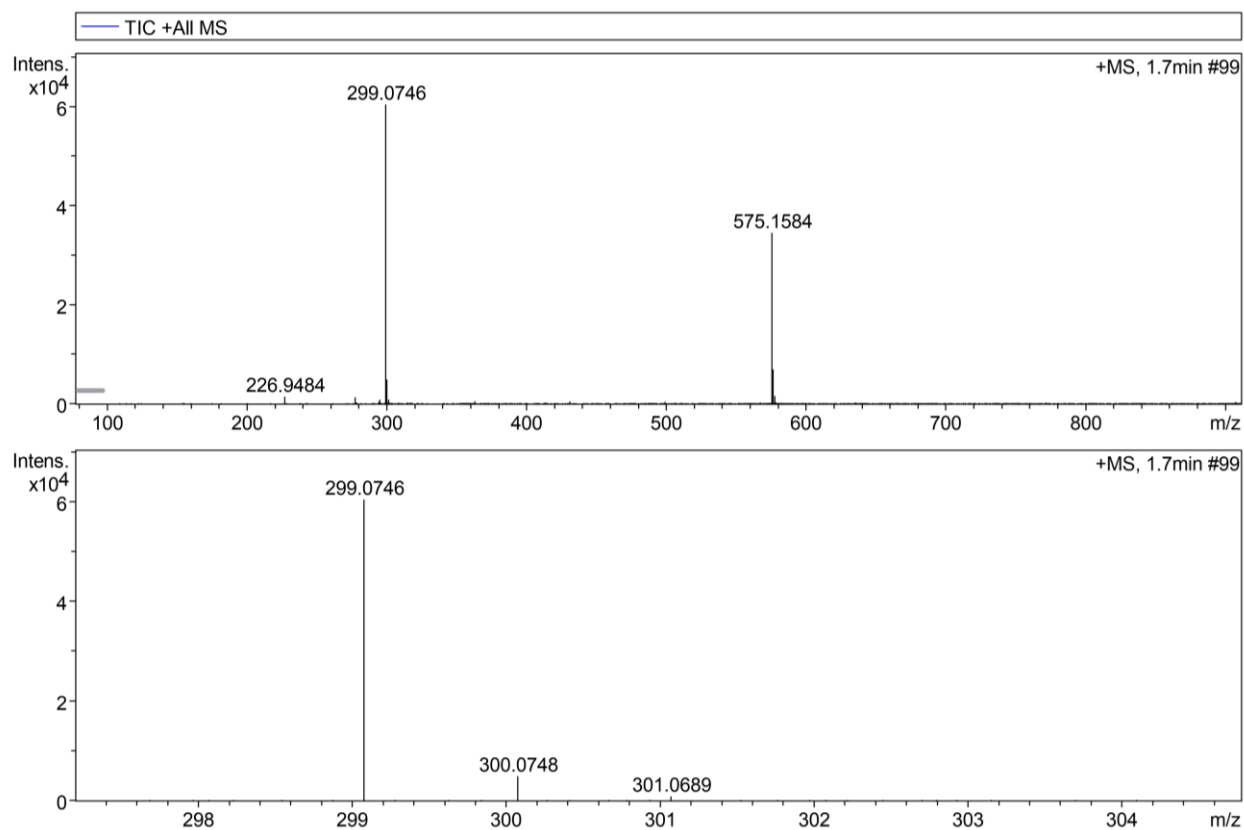

**Figure S61.** HRMS of 2-methoxy-4-methyl-1-tosylbenzene (**3v'**)

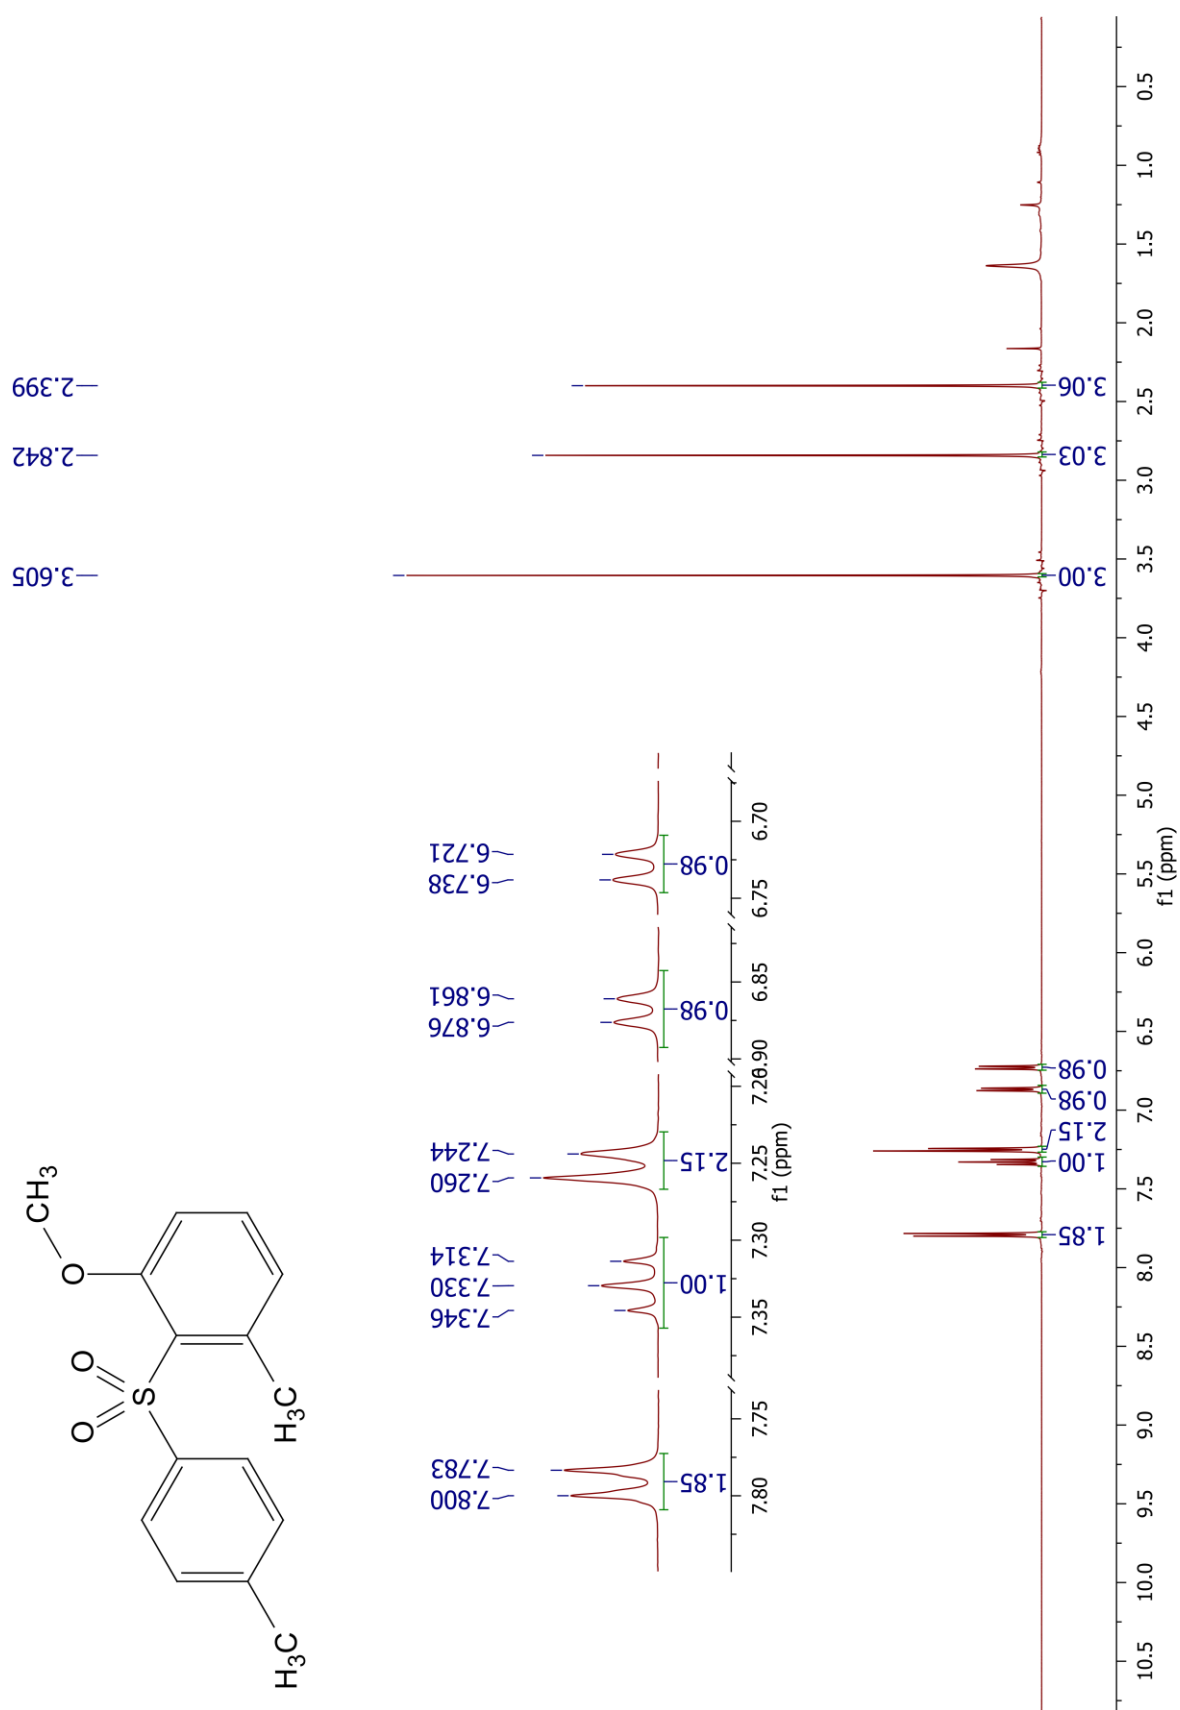

**Figure S62.** <sup>1</sup>H-NMR of 1-methoxy-3-methyl-1-tosylbenzene (3v'')

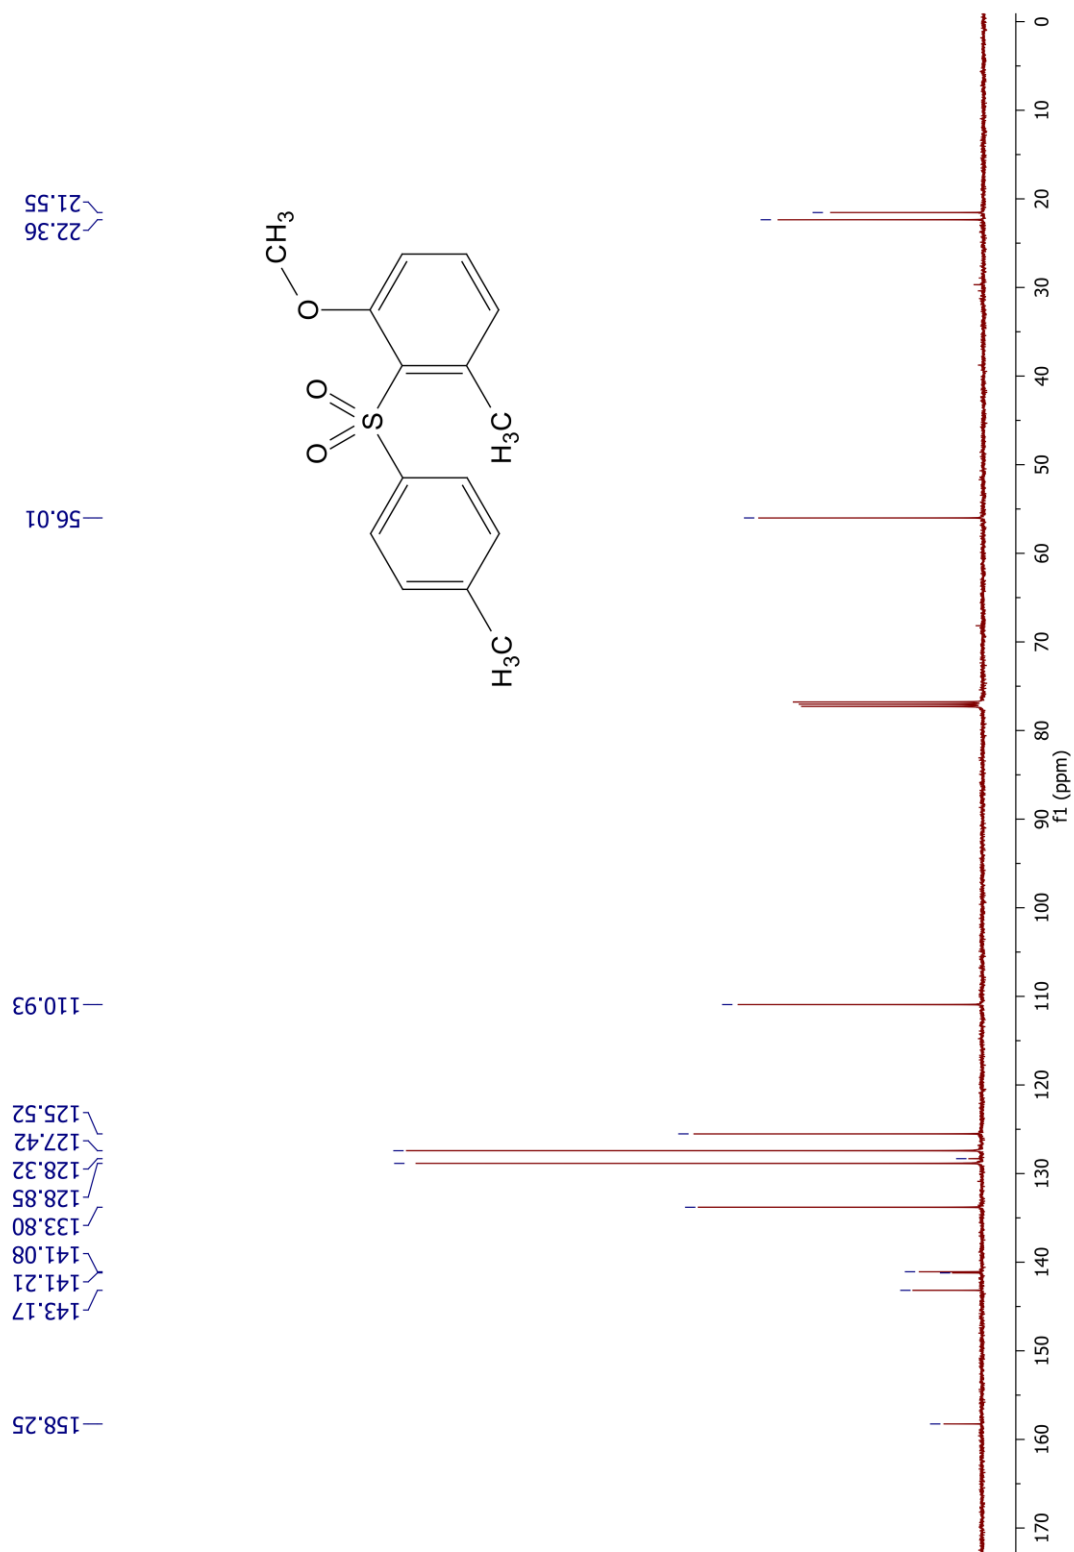

**Figure S63.** <sup>13</sup>C-NMR of 1-methoxy-3-methyl-1-tosylbenzene (**3v''**)

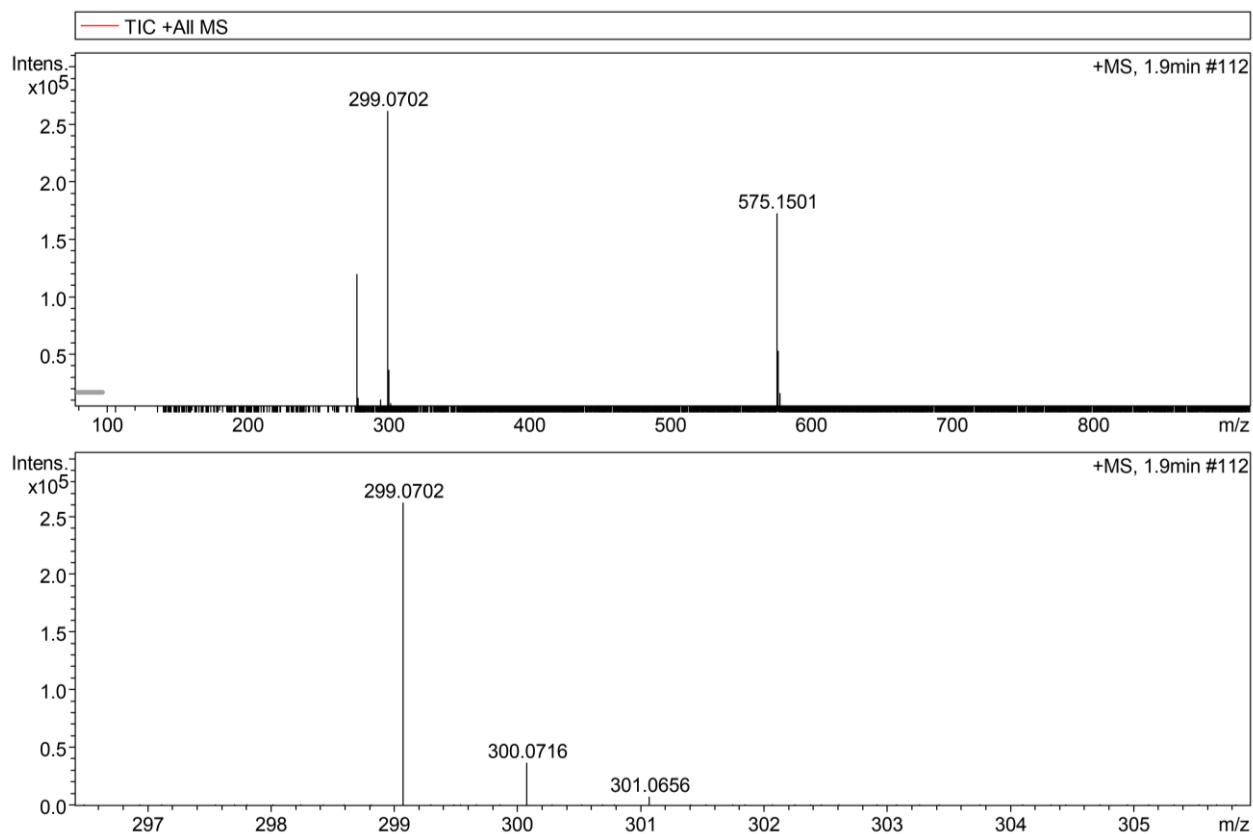

**Figure S64.** HRMS of 1-methoxy-3-methyl-1-tosylbenzene (**3v''**)

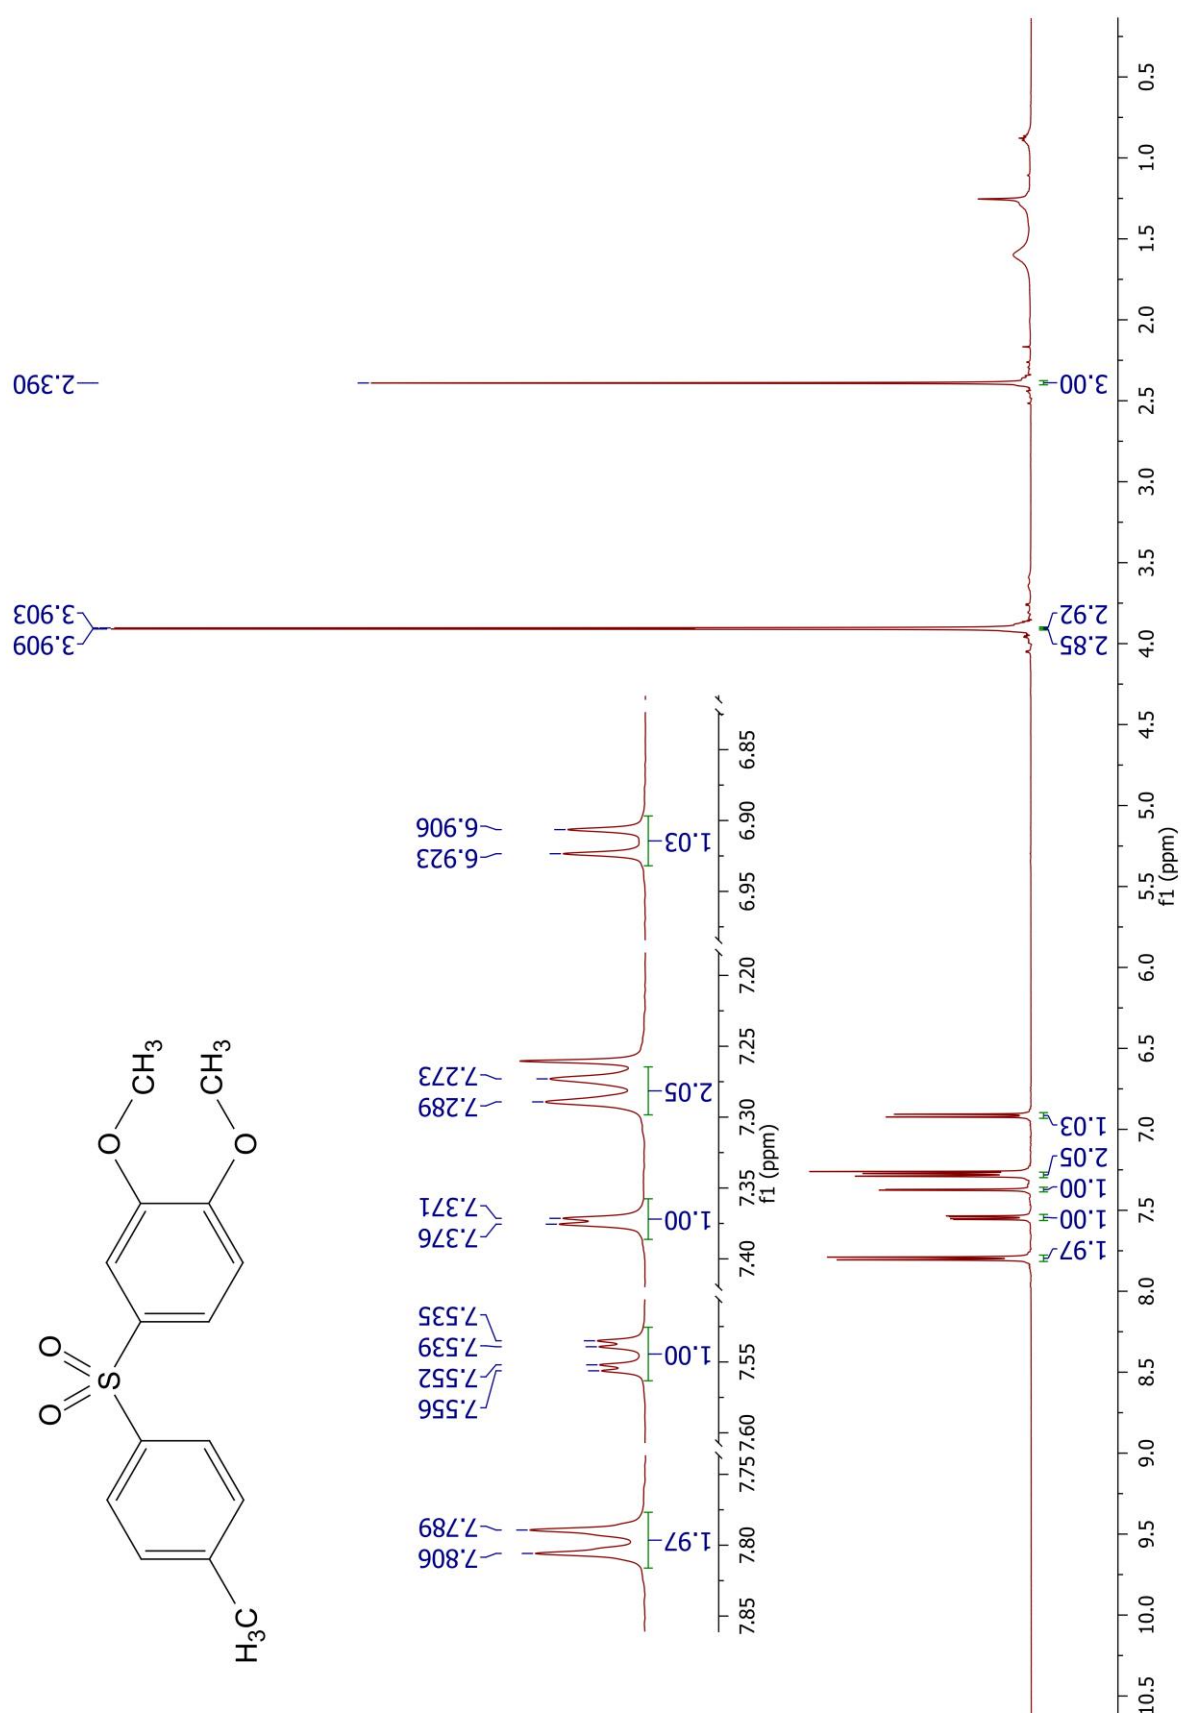

**Figure S65.** <sup>1</sup>H-NMR of 1,2-dimethoxy-4-tosylbenzene (**3w**)

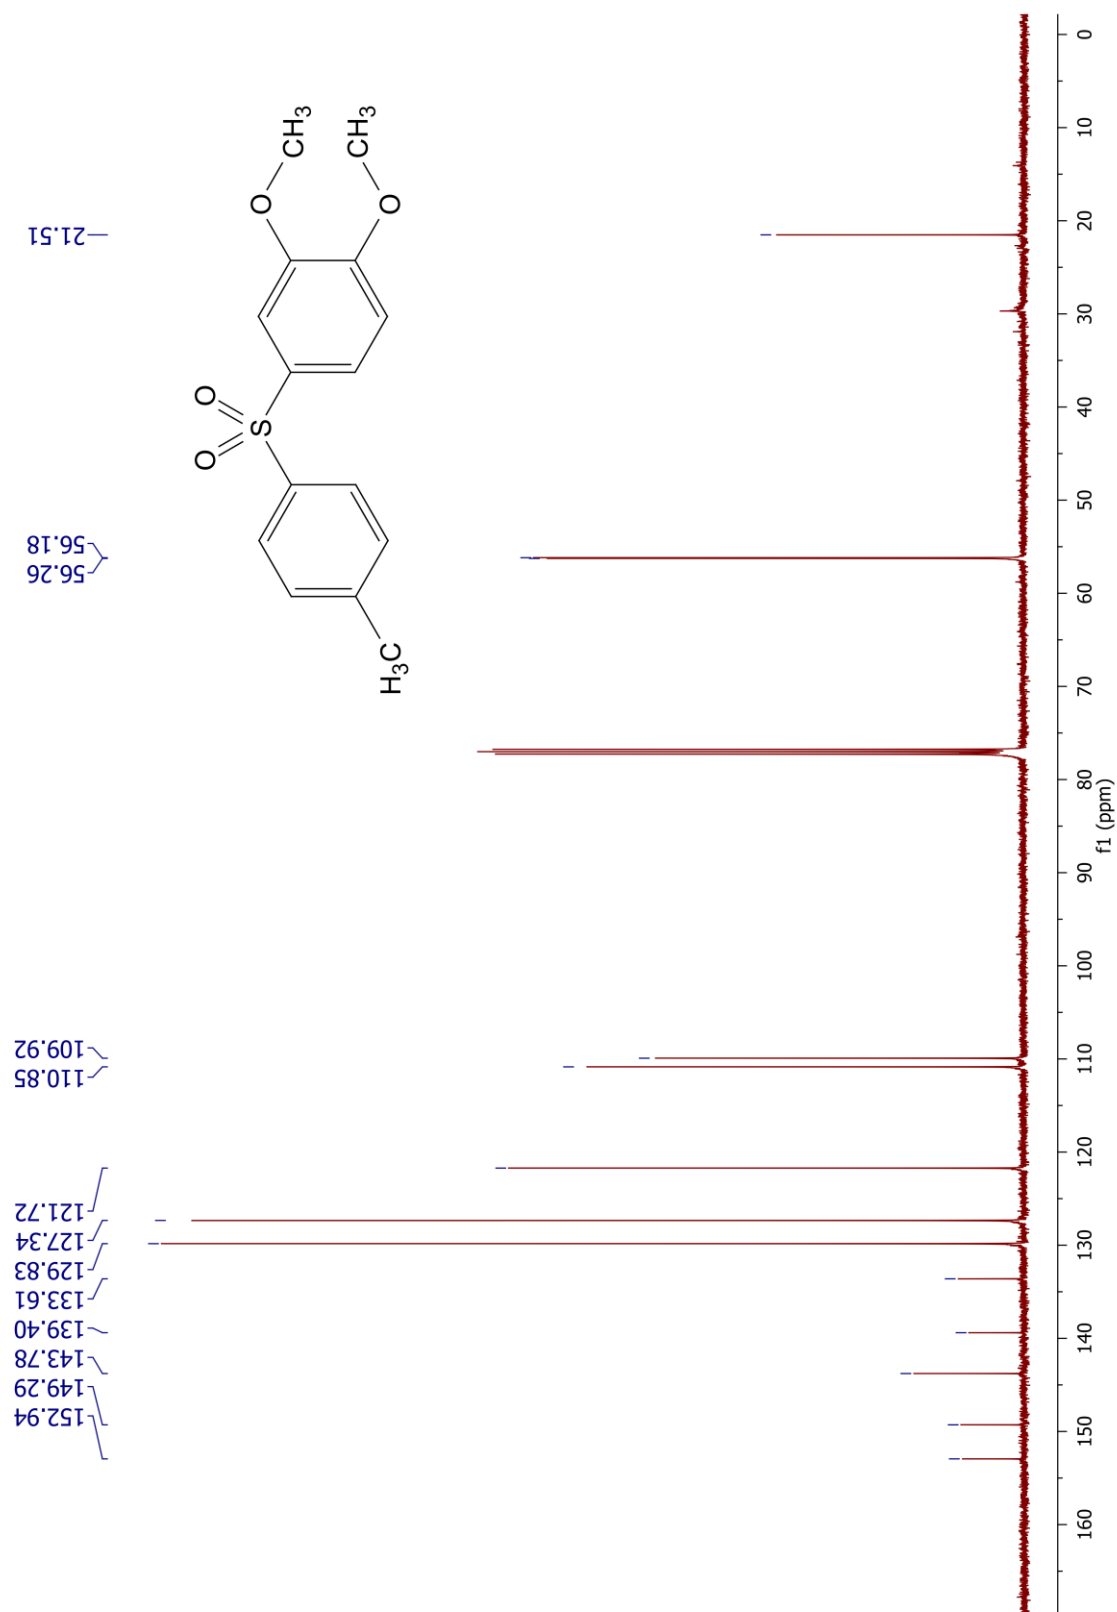

**Figure S66.** <sup>13</sup>C-NMR of 1,2-dimethoxy-4-tosylbenzene (3w)



### Full mass spectrum

Spectrum from TD12-D\_(+)ESI.wiff2 (sample 1) - TD12-D\_(+)ESI, +TOF MS (50 - 1500) from 0.148 min, noise filtered (noise multiplier = 1.5), Gaussian smoothed (0.5 points)

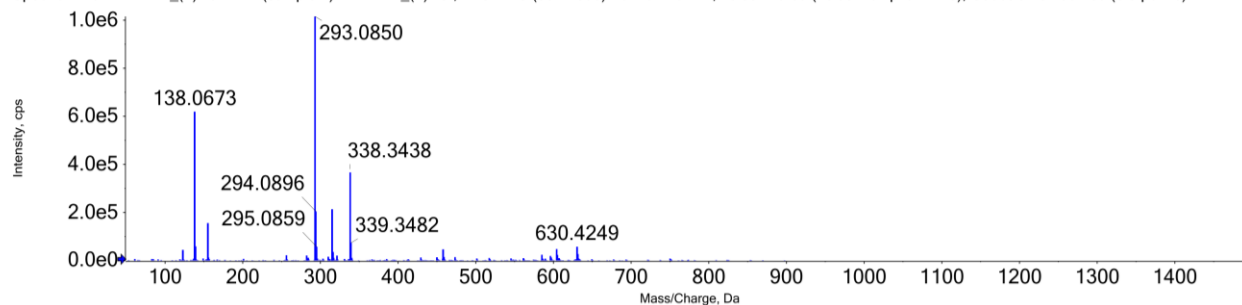

### Expanded spectrum

Spectrum from TD12-D\_(+)ESI.wiff2 (sample 1) - TD12-D\_(+)ESI, +TOF MS (50 - 1500) from 0.148 min, noise filtered (noise multiplier = 1.5), Gaussian smoothed (0.5 points)

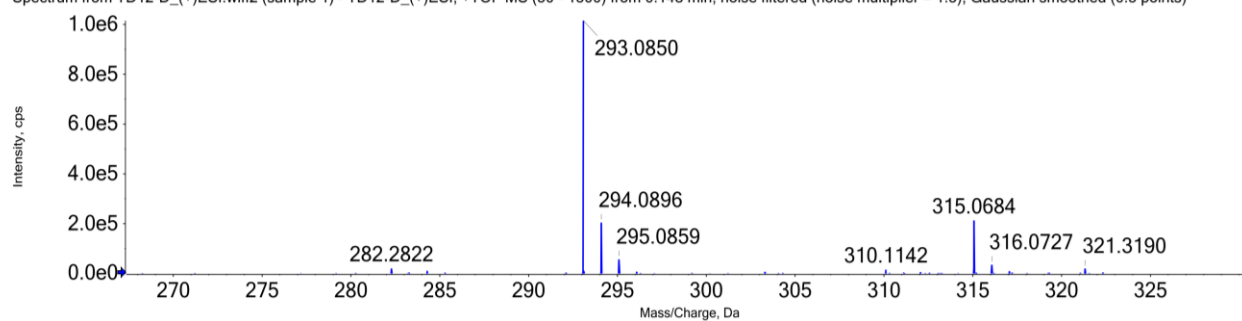

**Figure S67.** HRMS of 1,2-dimethoxy-4-tosylbenzene (**3w**)

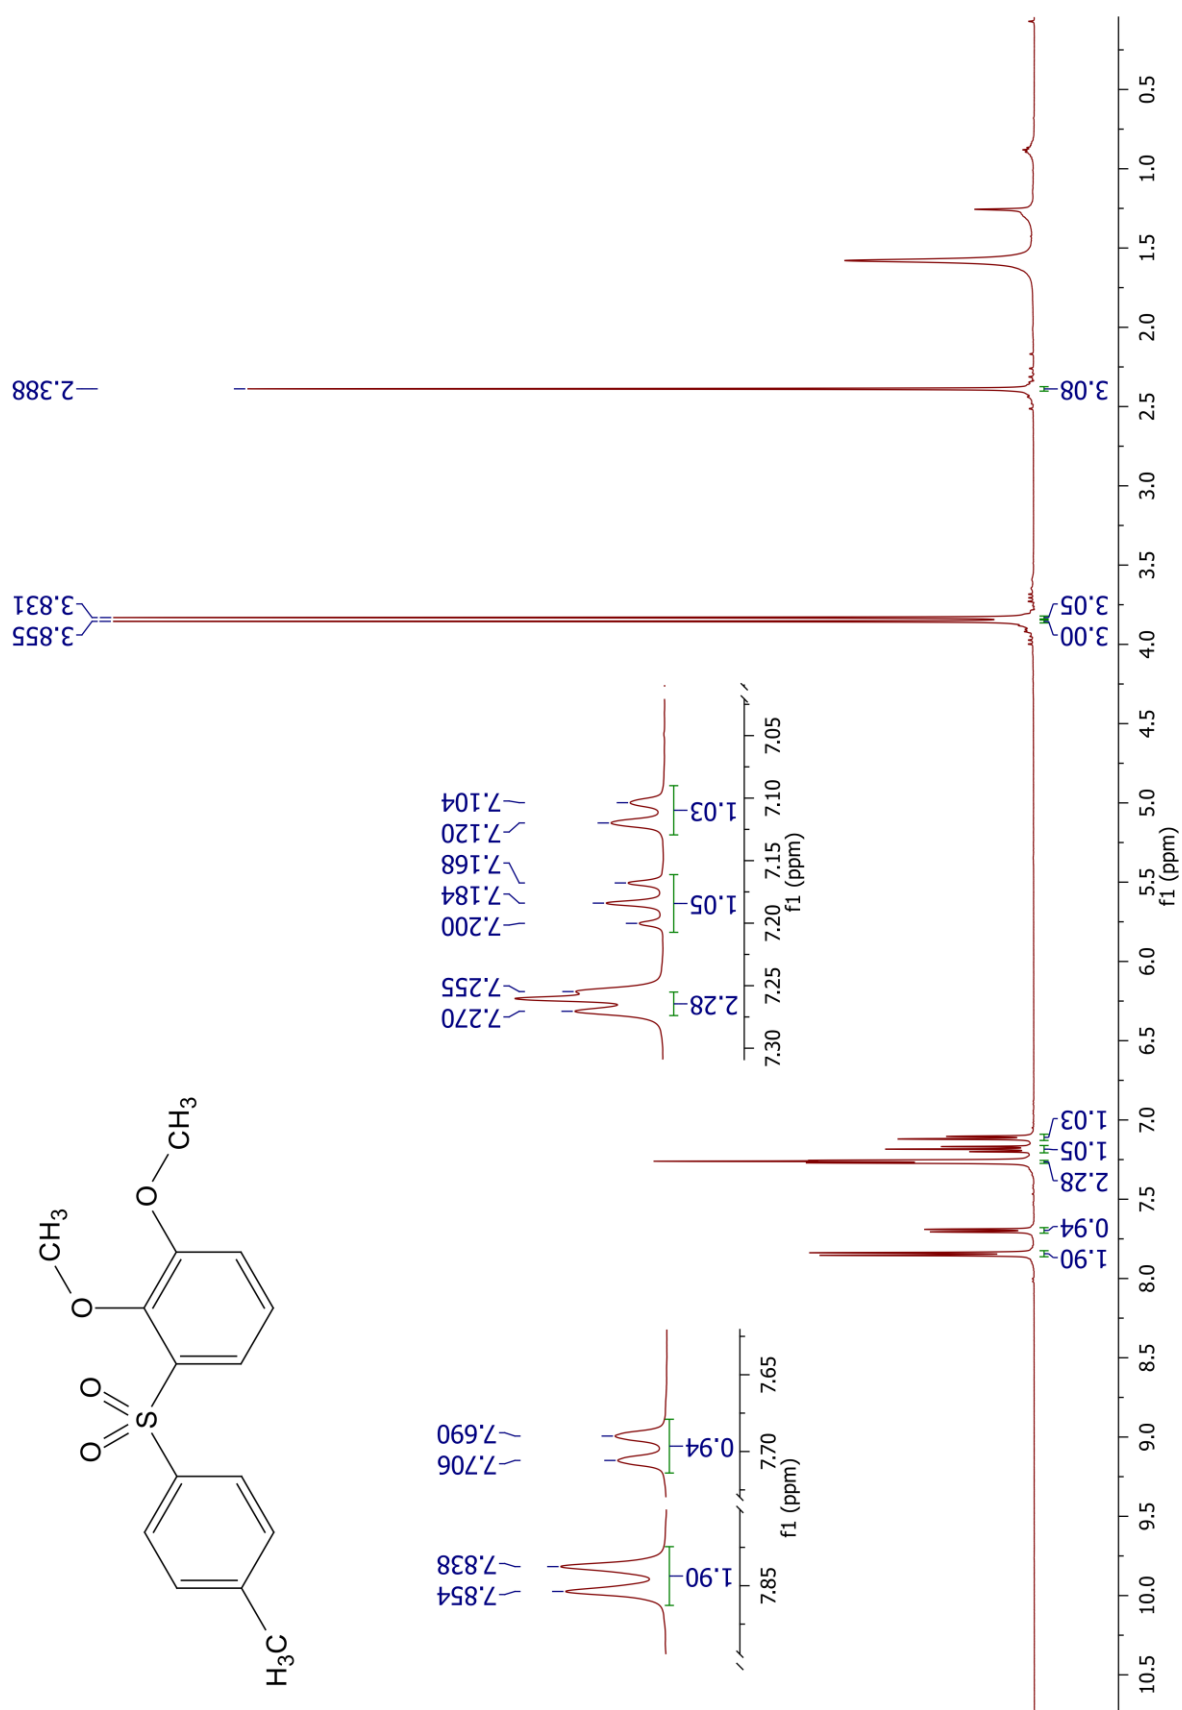

**Figure S68.** <sup>1</sup>H-NMR of 1,2-dimethoxy-3-tosylbenzene (**3w'**)

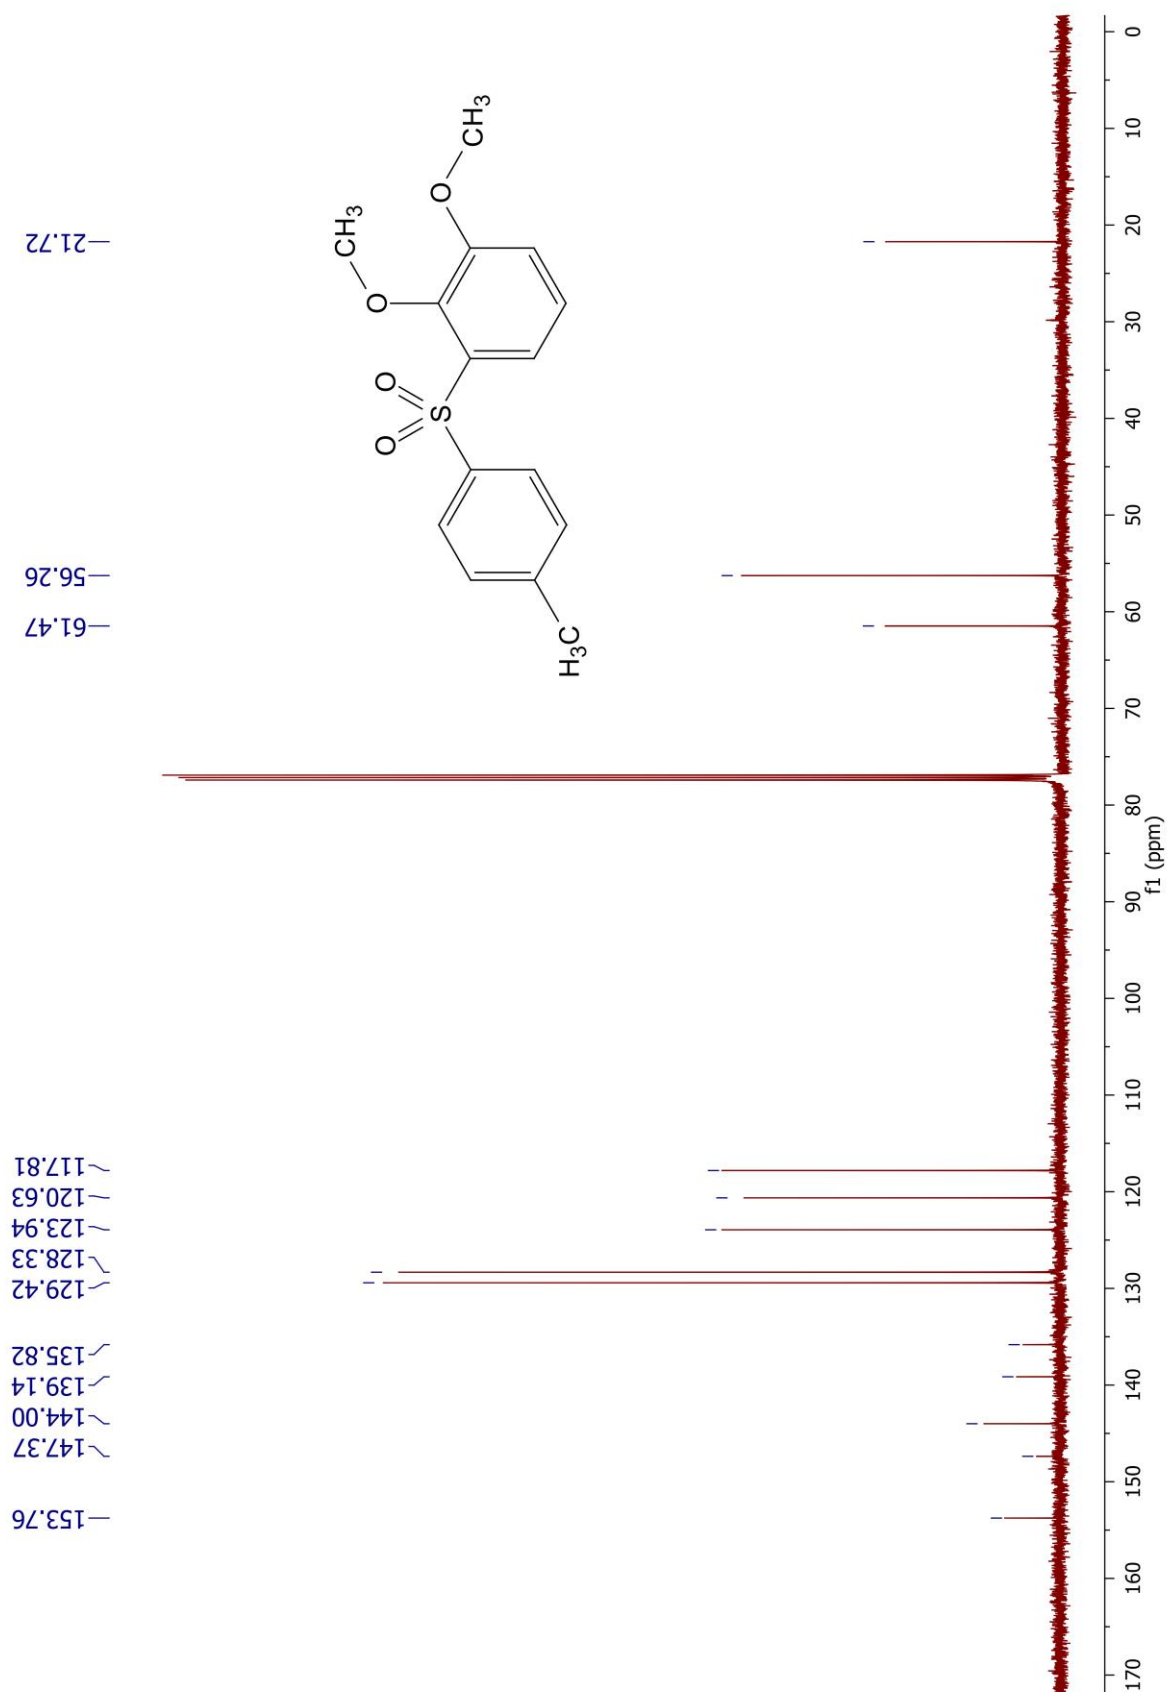

**Figure S69.** <sup>13</sup>C-NMR of 1,2-dimethoxy-3-tosylbenzene (**3w'**)

### Full mass spectrum

Spectrum from TD12-T\_(+).ESI.wiff2 (sample 1) - TD12-T\_(+).ESI, +TOF MS (50 - 1500) from 0.148 min, noise filtered (noise multiplier = 1.5), Gaussian smoothed (0.5 points)

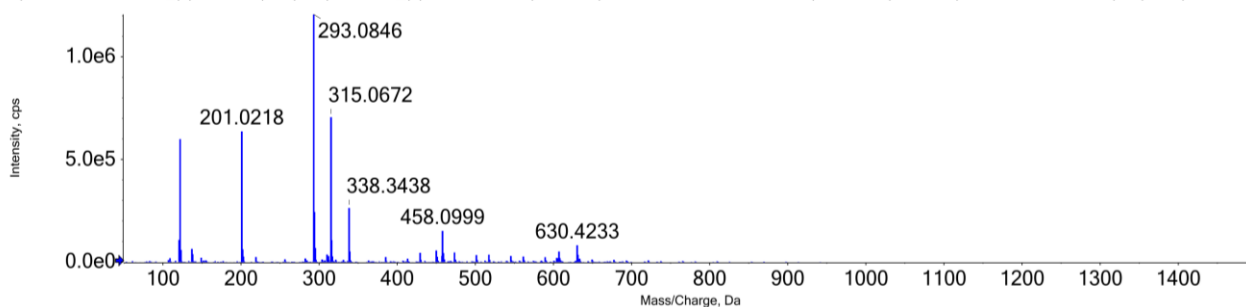

### Expanded spectrum

Spectrum from TD12-T\_(+).ESI.wiff2 (sample 1) - TD12-T\_(+).ESI, +TOF MS (50 - 1500) from 0.148 min, noise filtered (noise multiplier = 1.5), Gaussian smoothed (0.5 points)

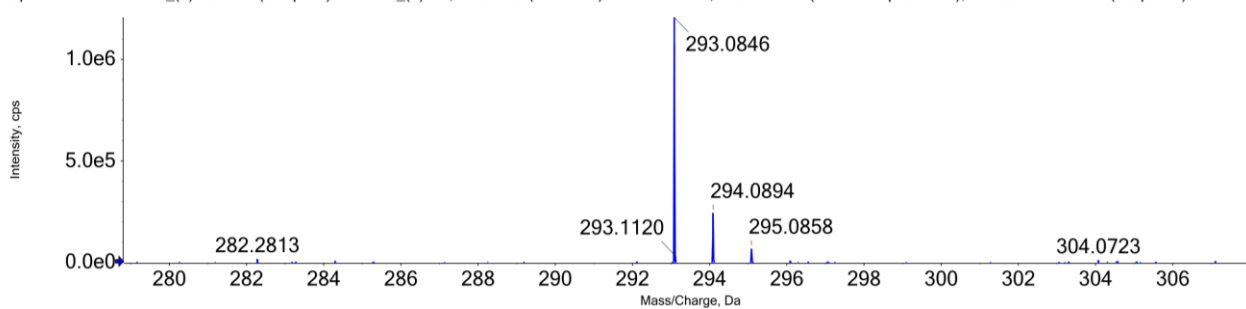

**Figure S70.** HRMS of 1,2-dimethoxy-3-tosylbenzene (**3w'**)
